# Supplementary material
Source: PubMed Central journal article supplement (PMC9381762)
Supplement: 41416_2022_1821_MOESM1_ESM.pdf [file 41416_2022_1821_MOESM1_ESM.pdf]

Supplementary Figure 1

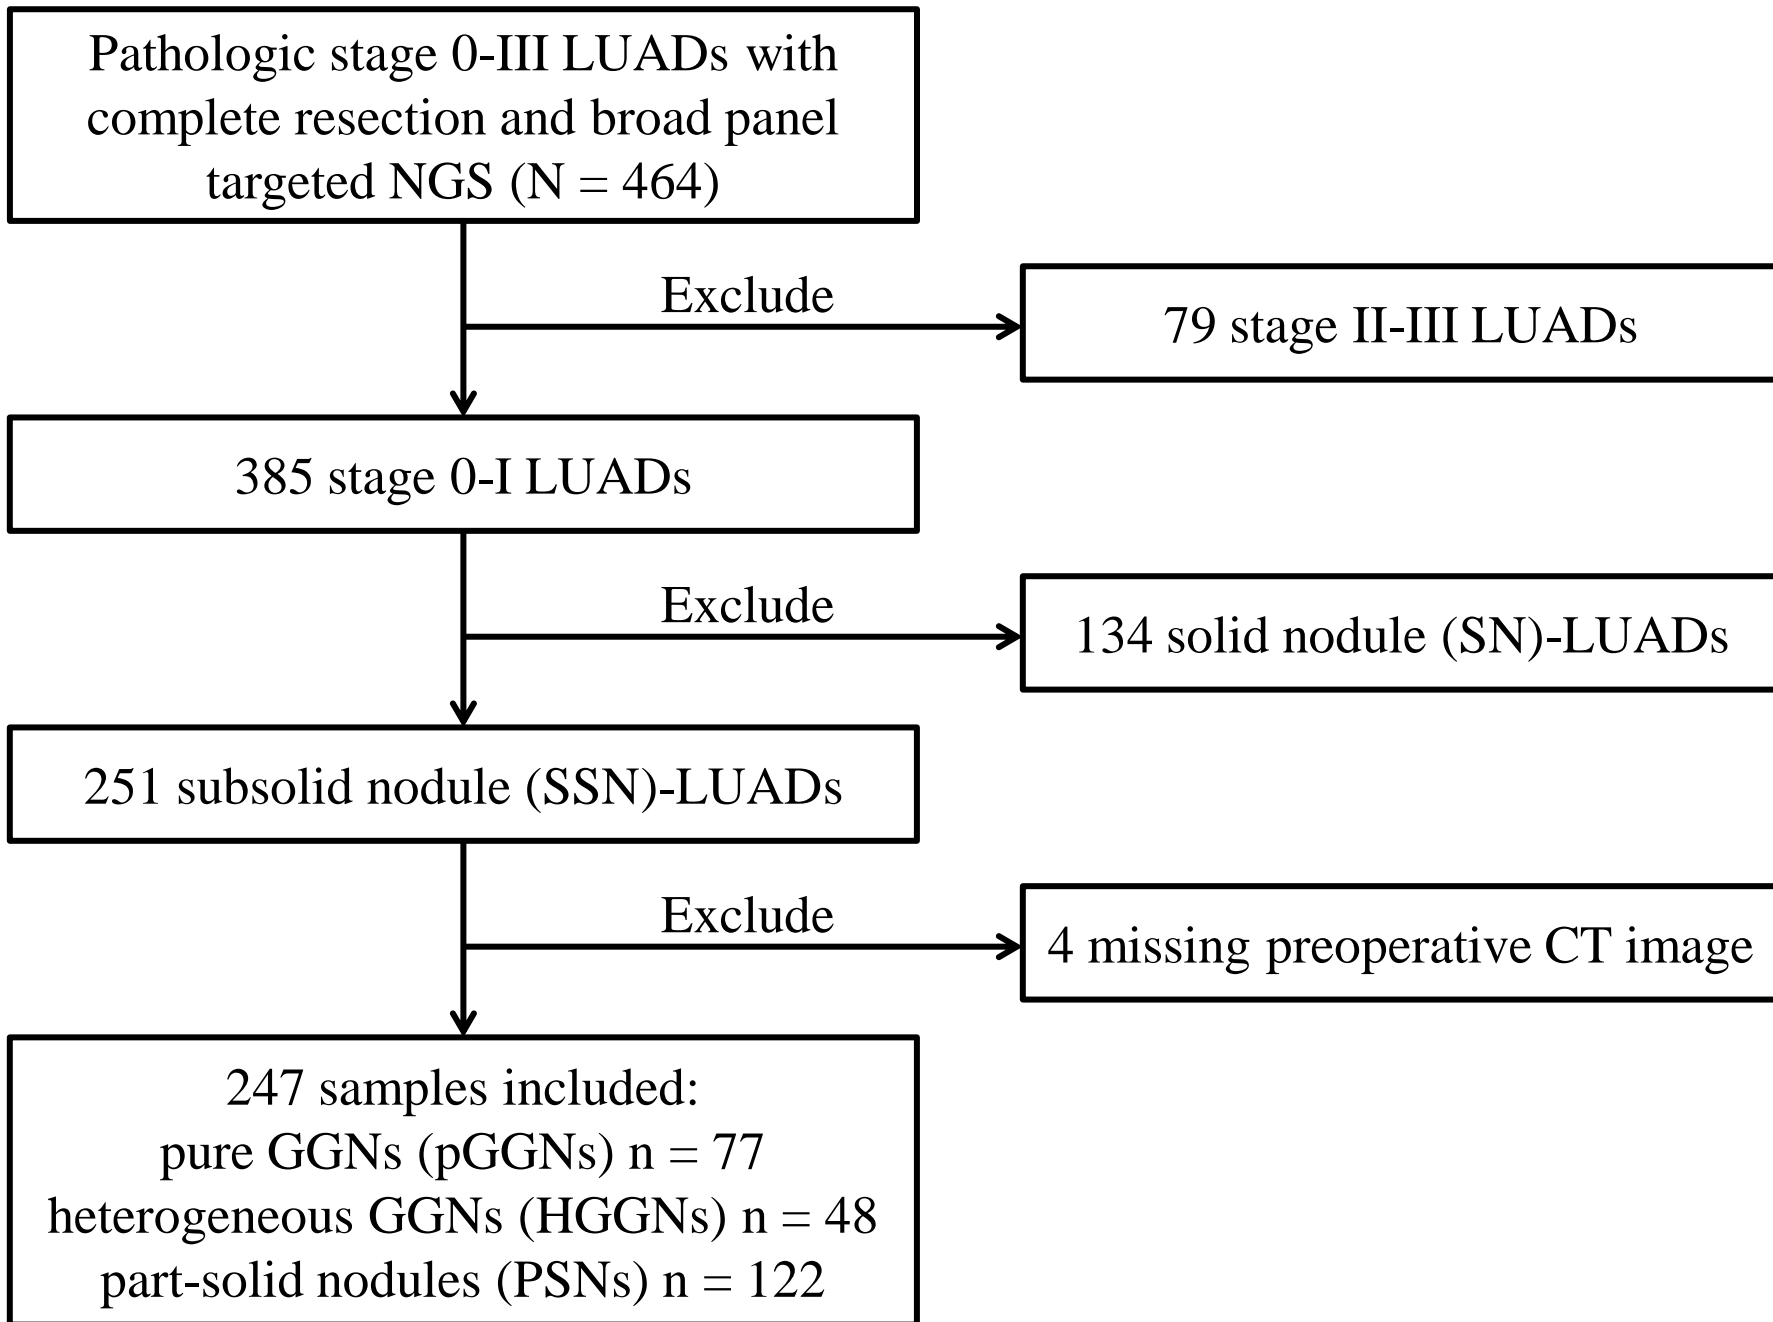

Supplementary Figure 2

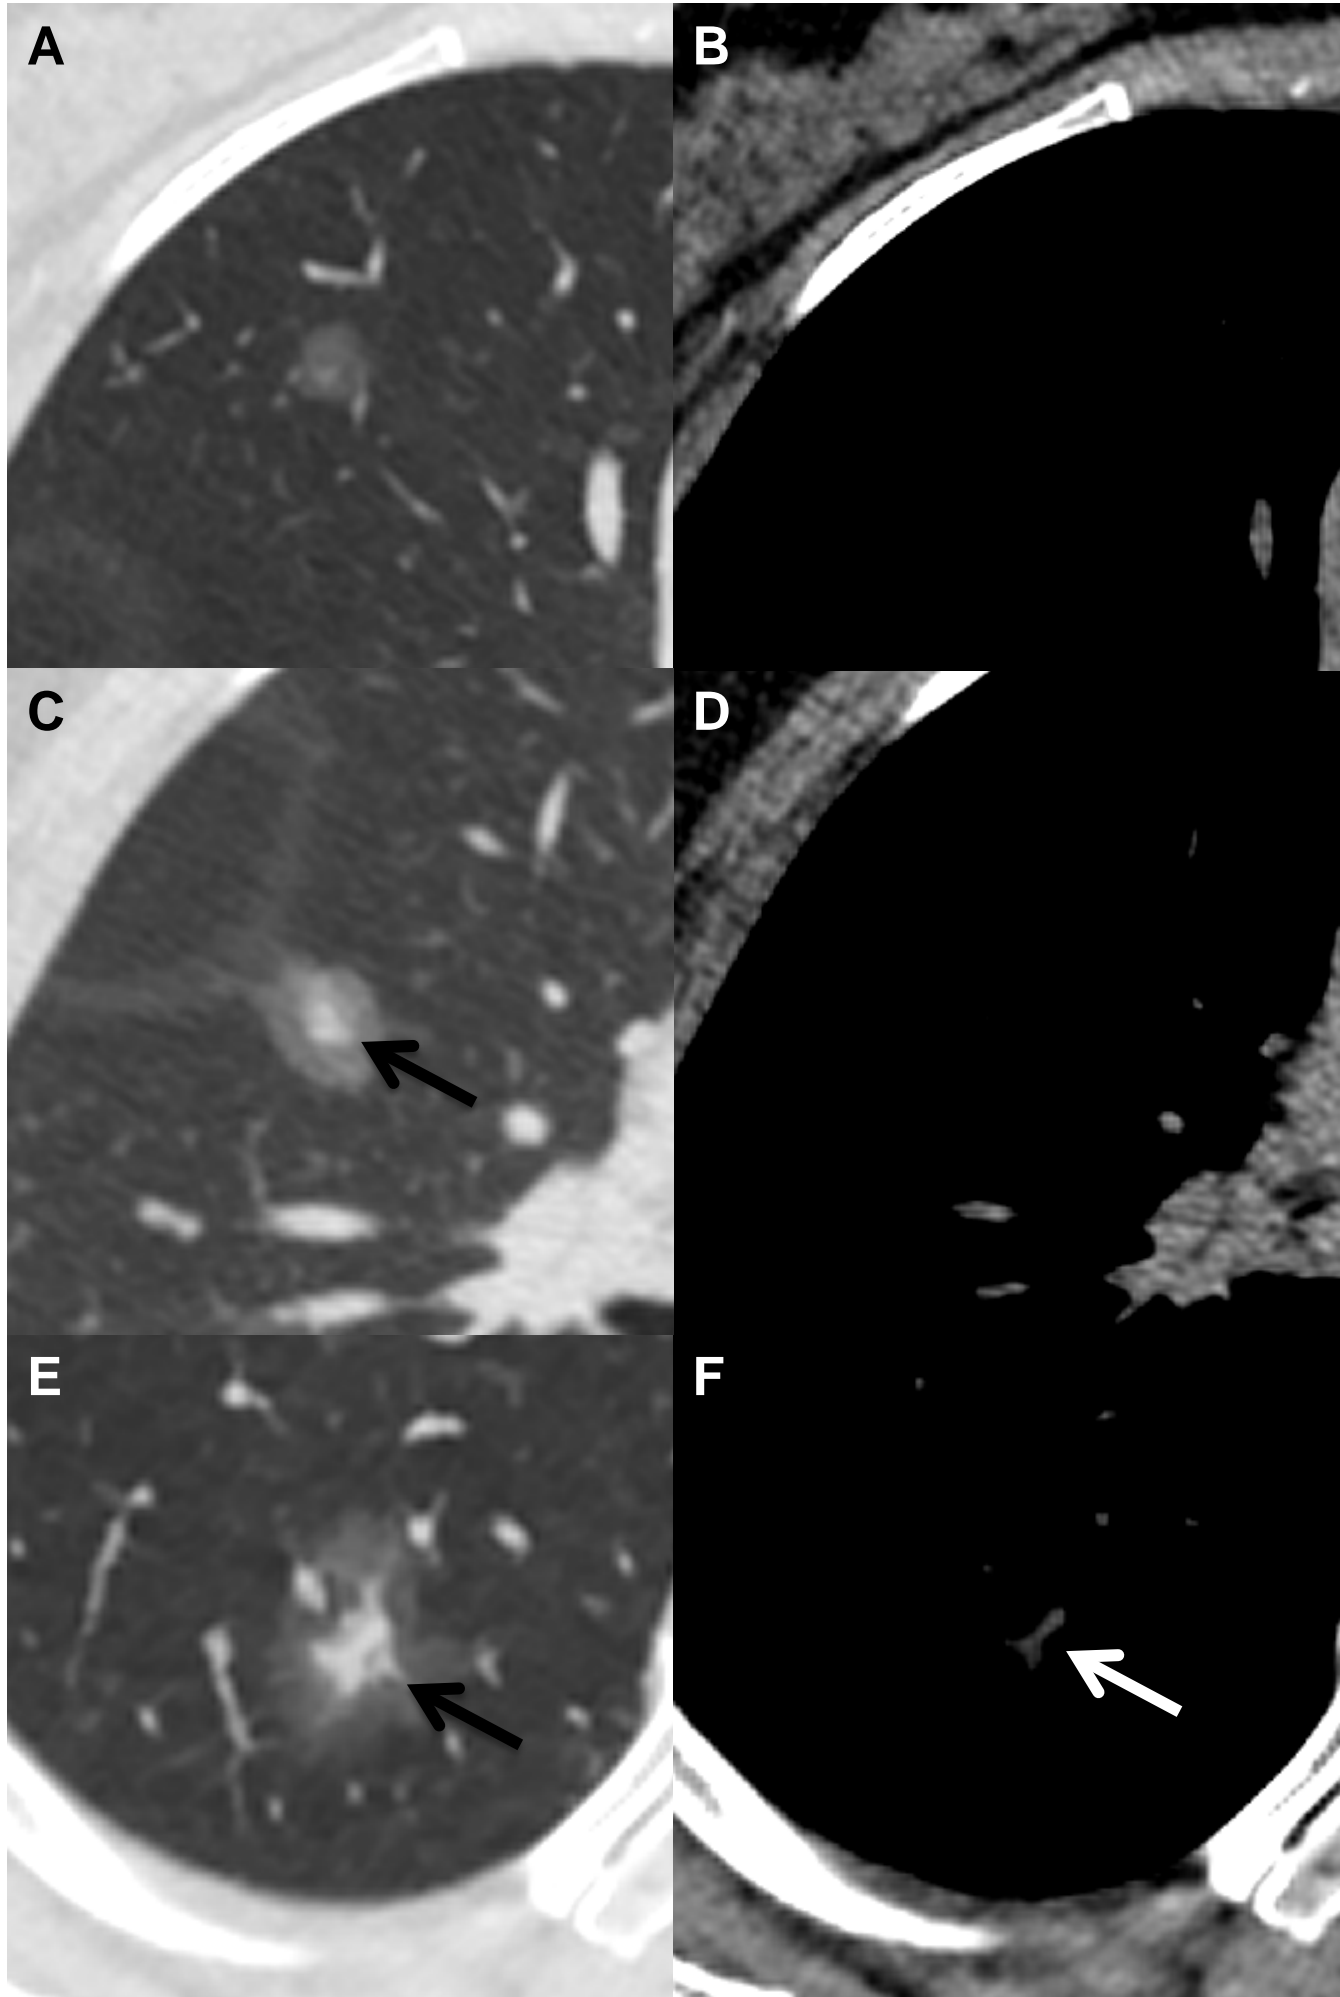

**A**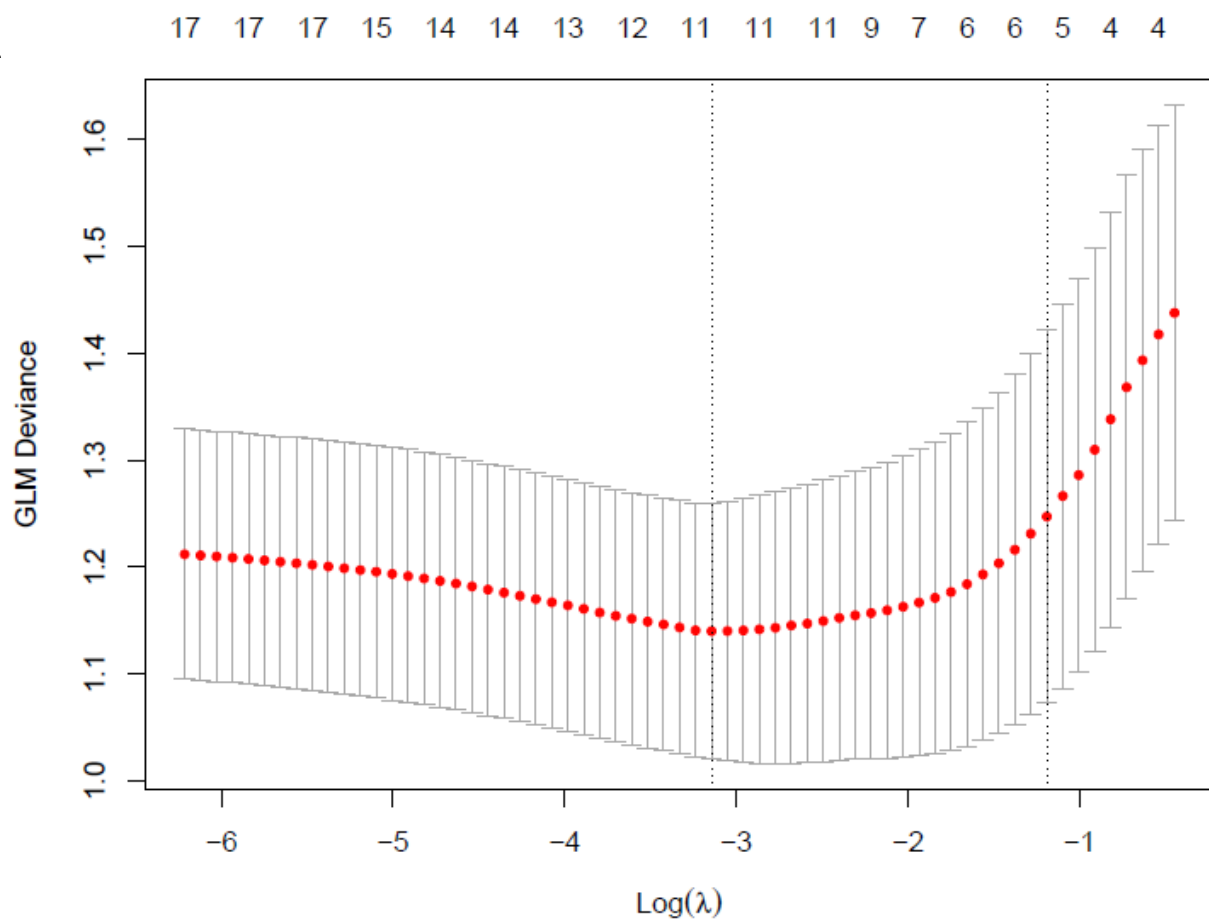**B**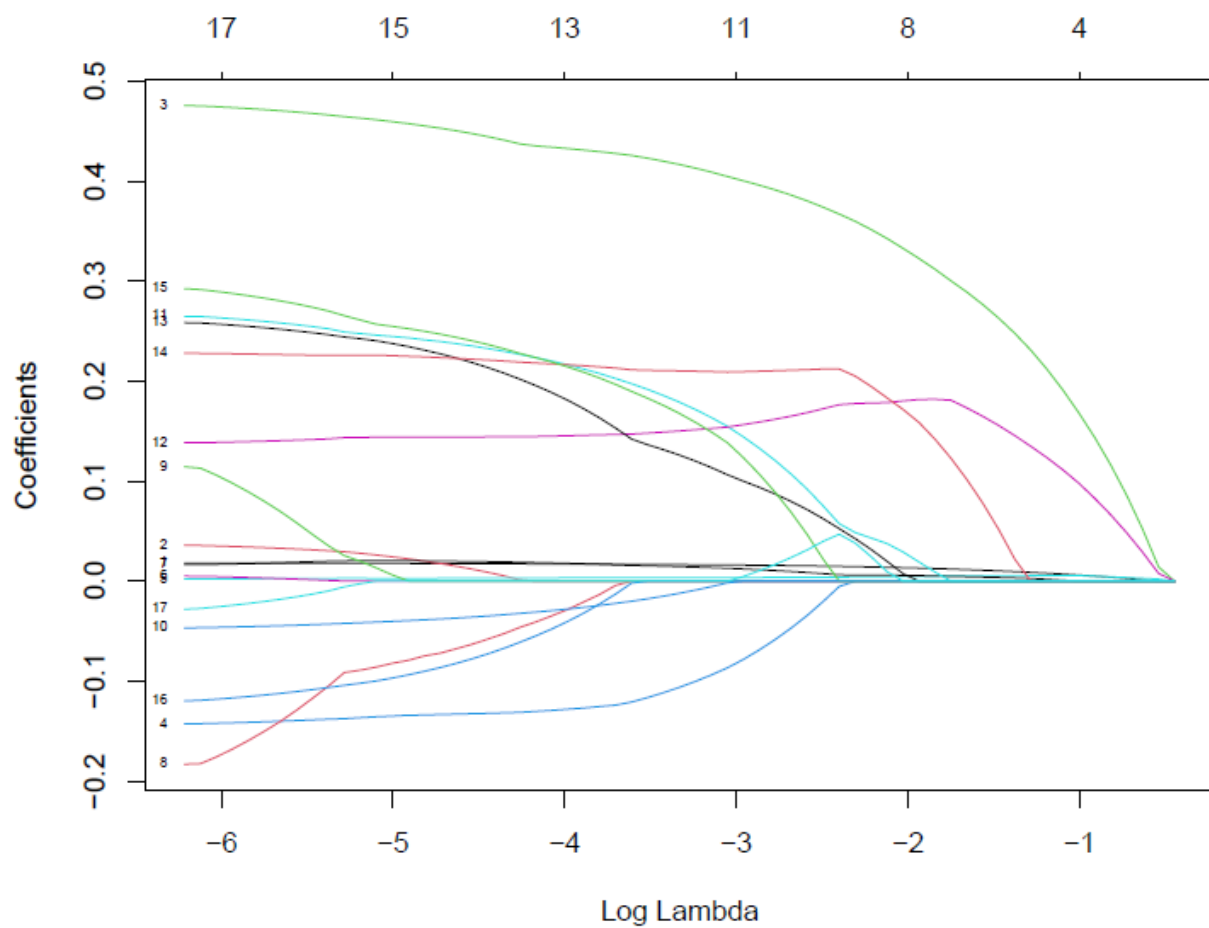

Supplementary Figure 4

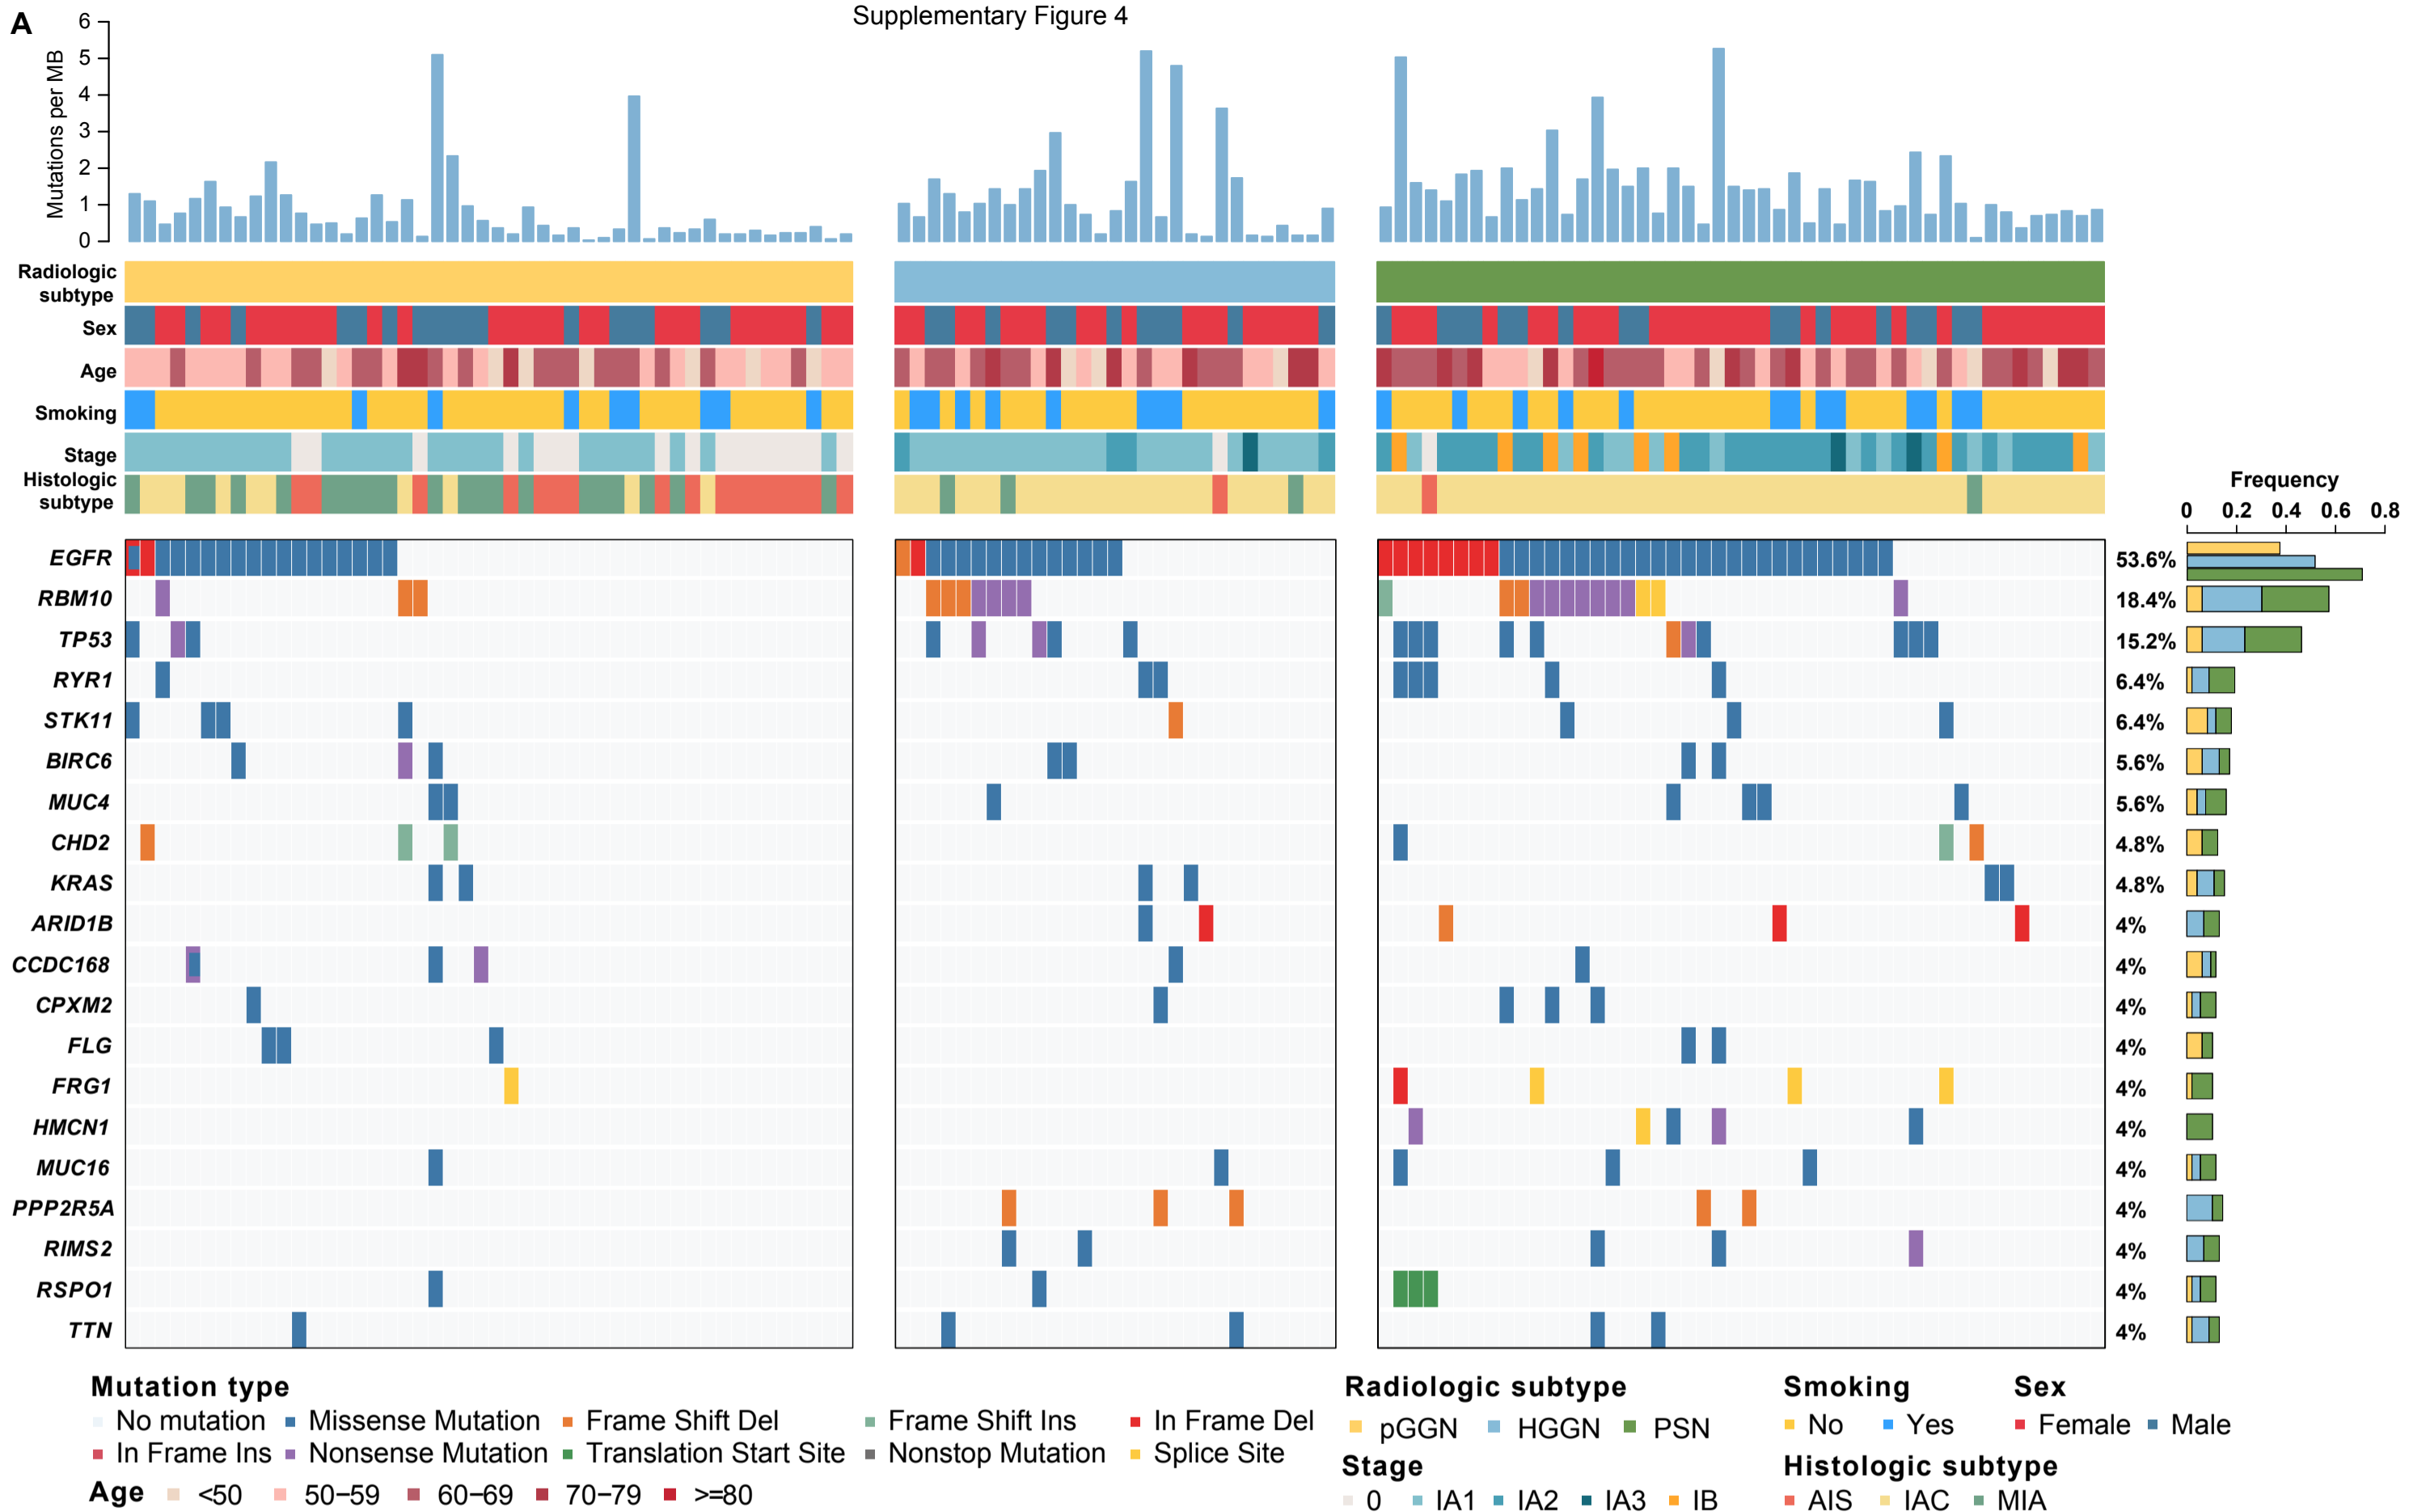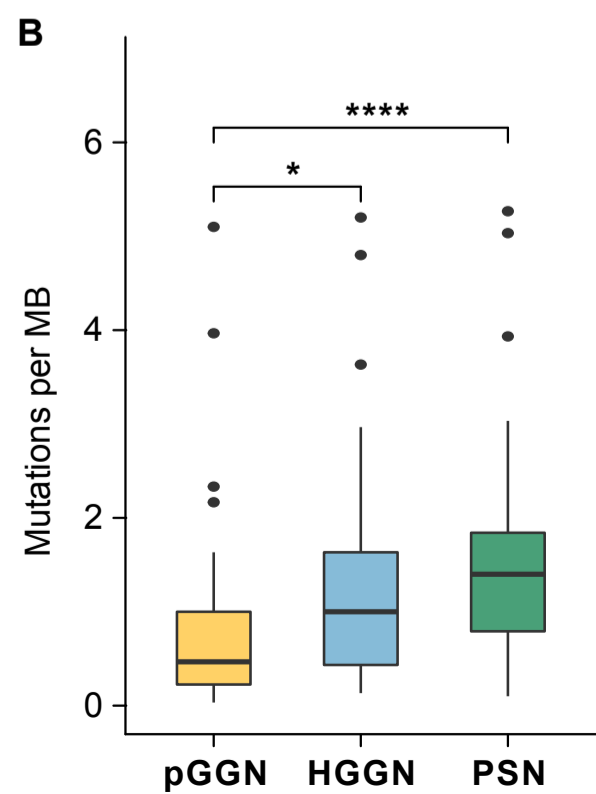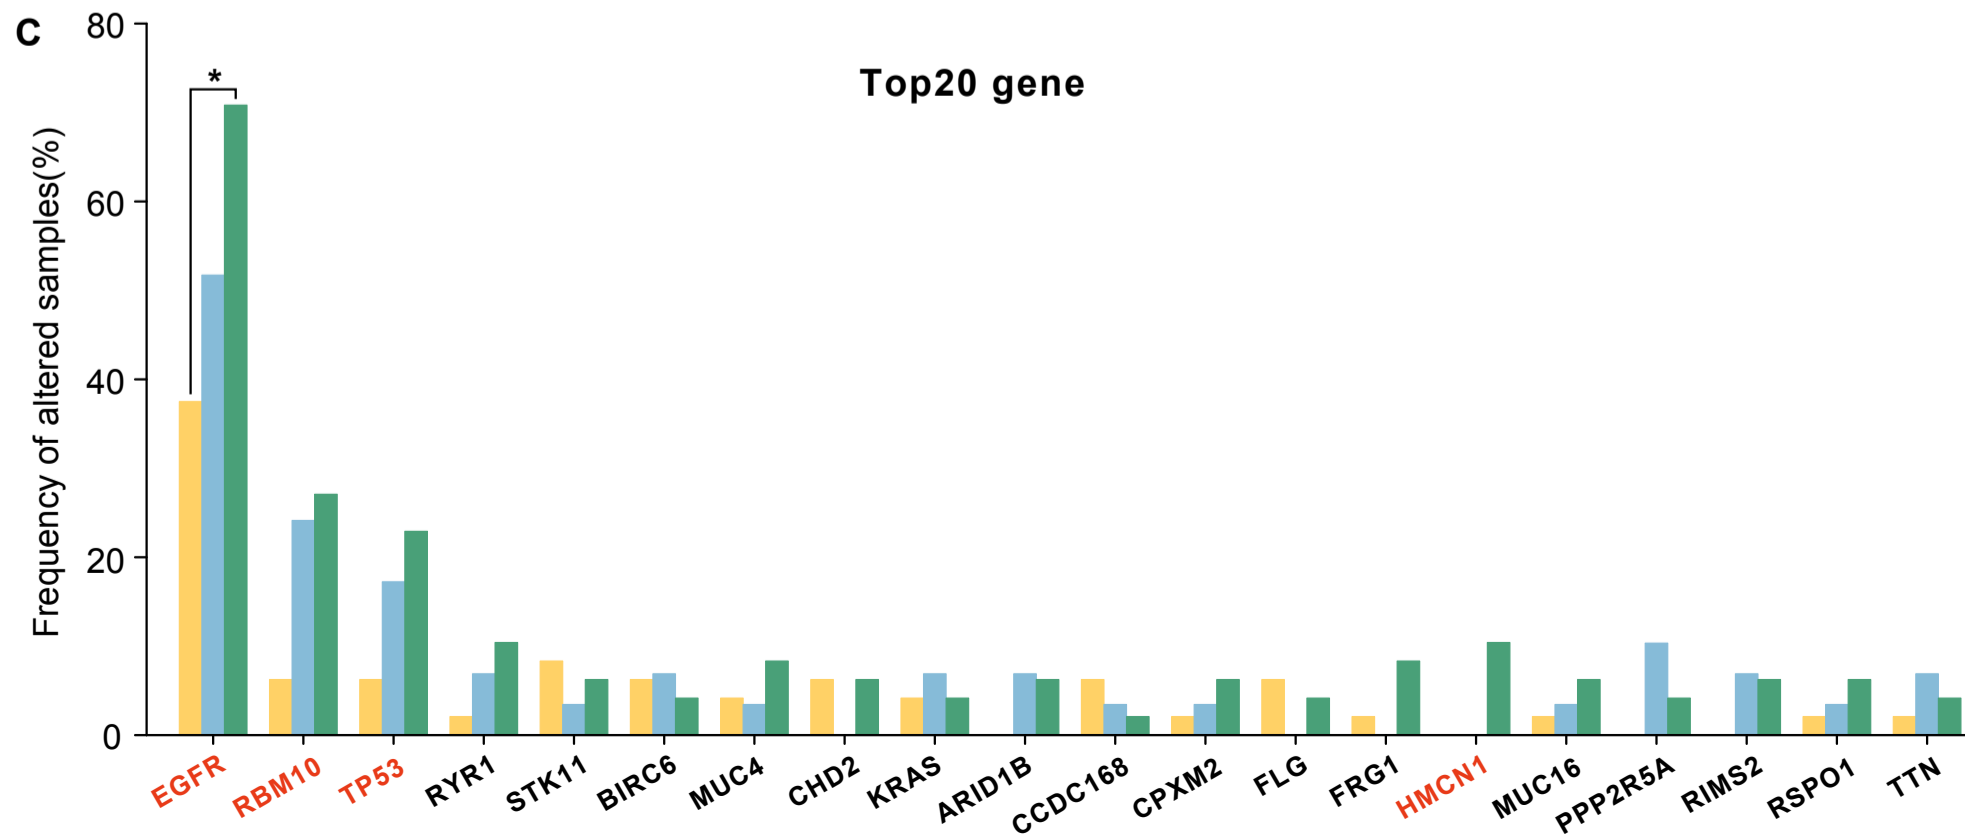

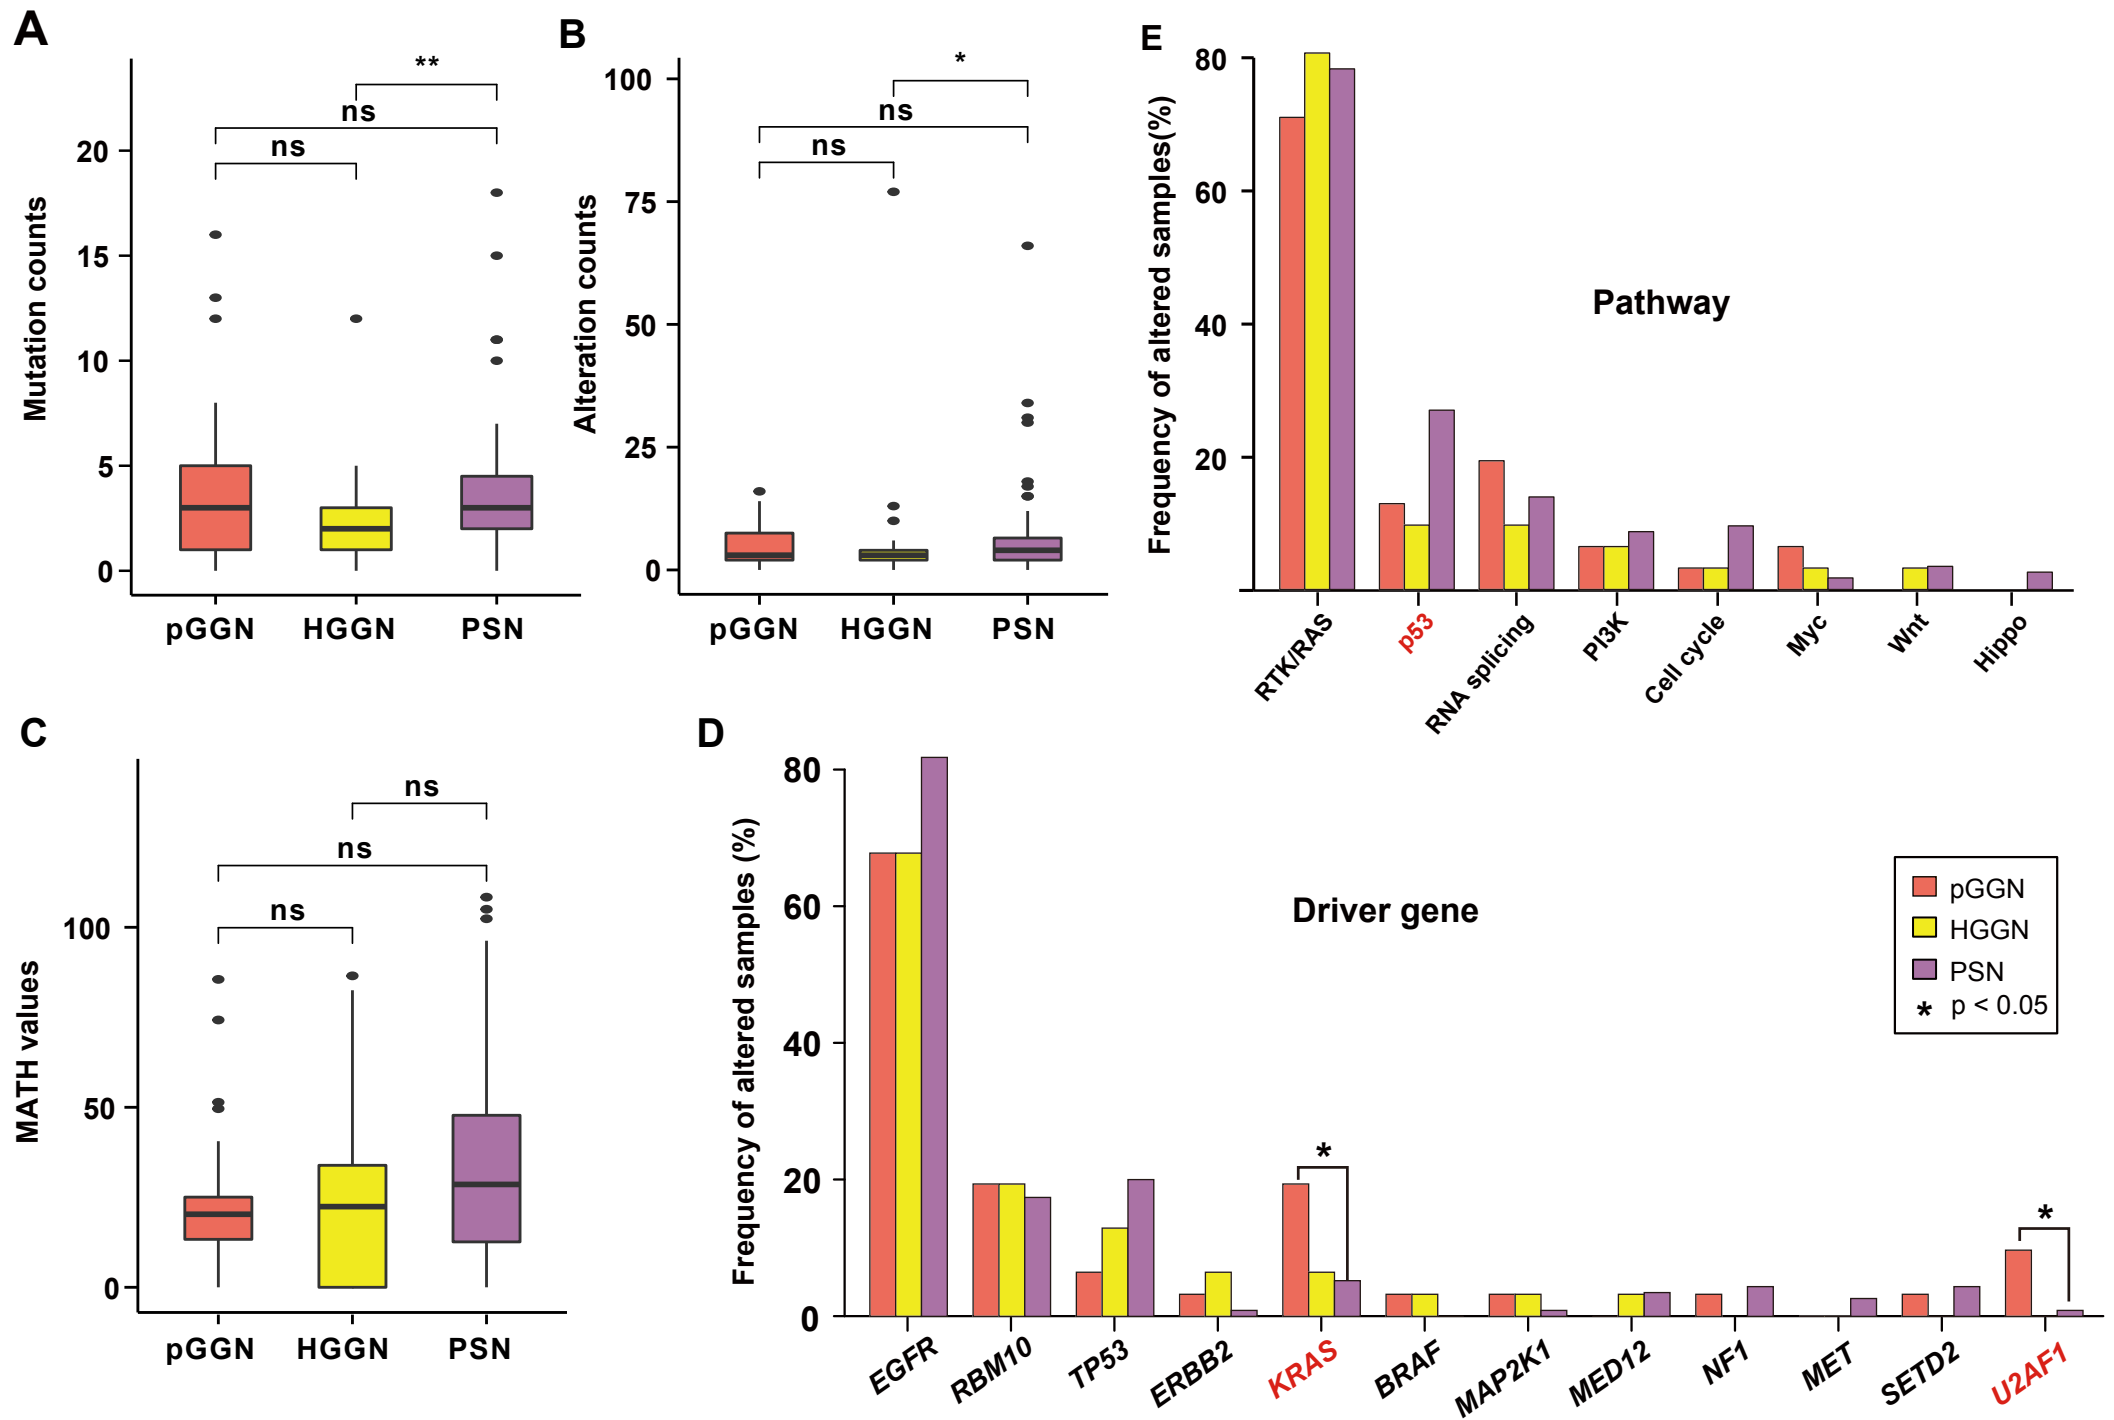

Supplementary Figure 6

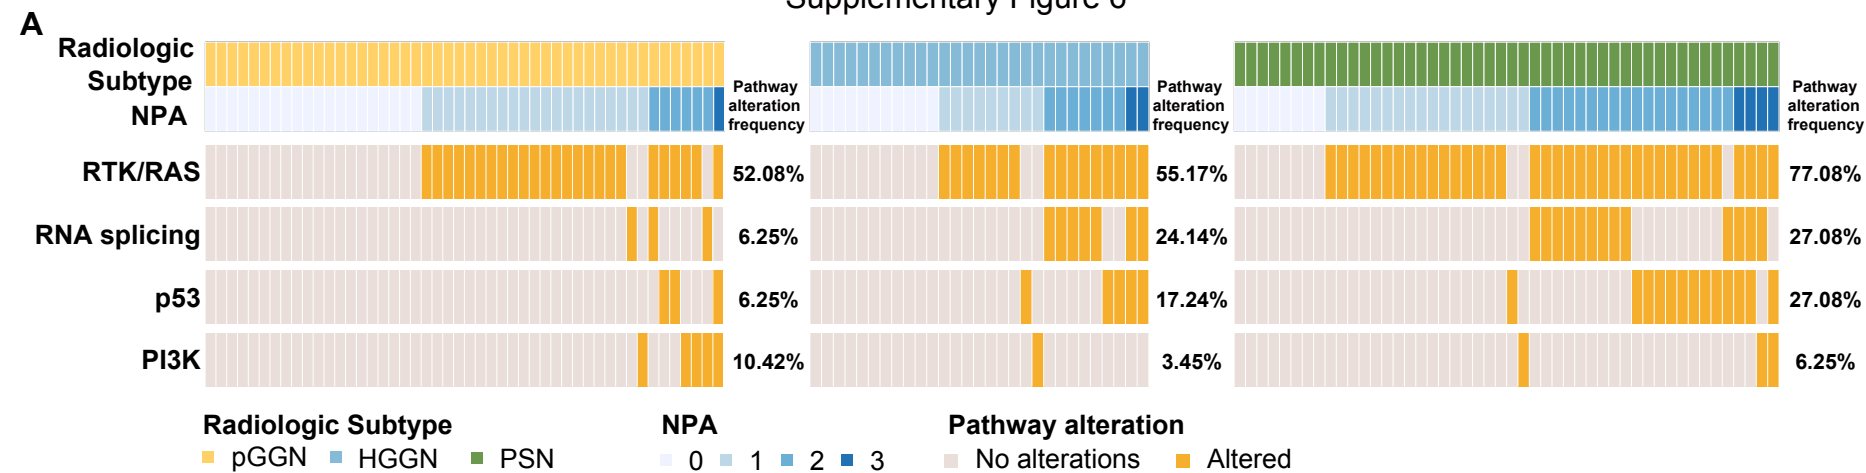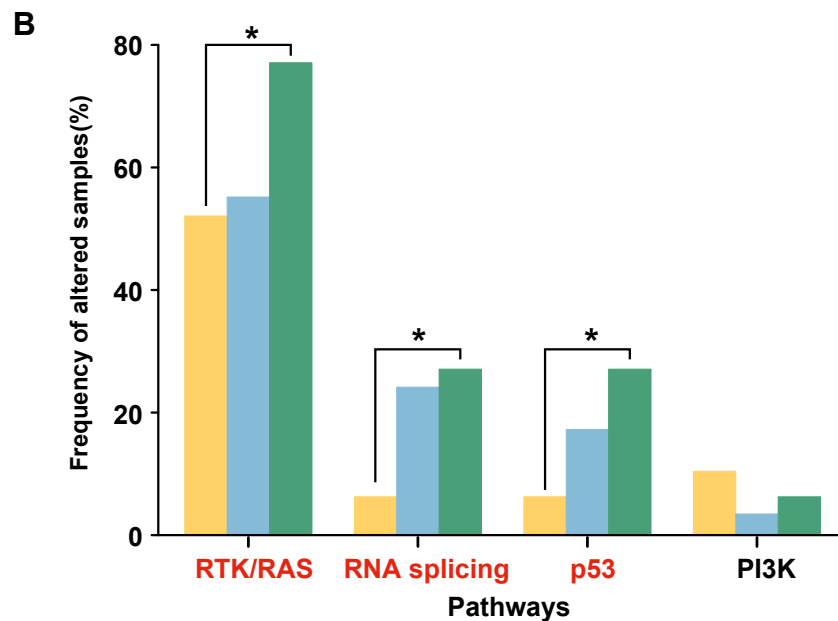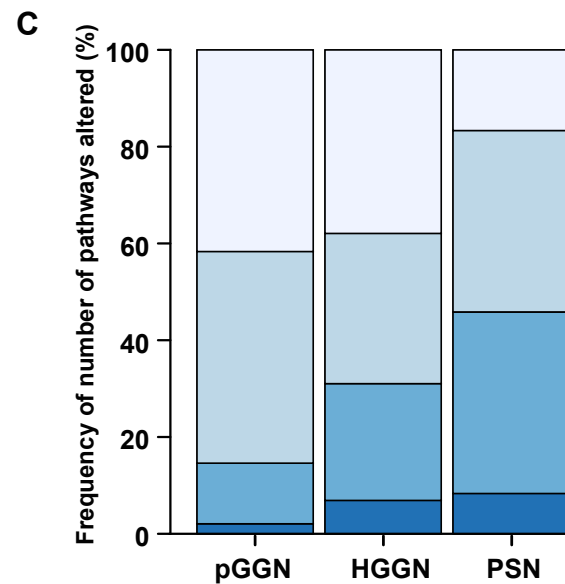



**A** CAPRI – Panel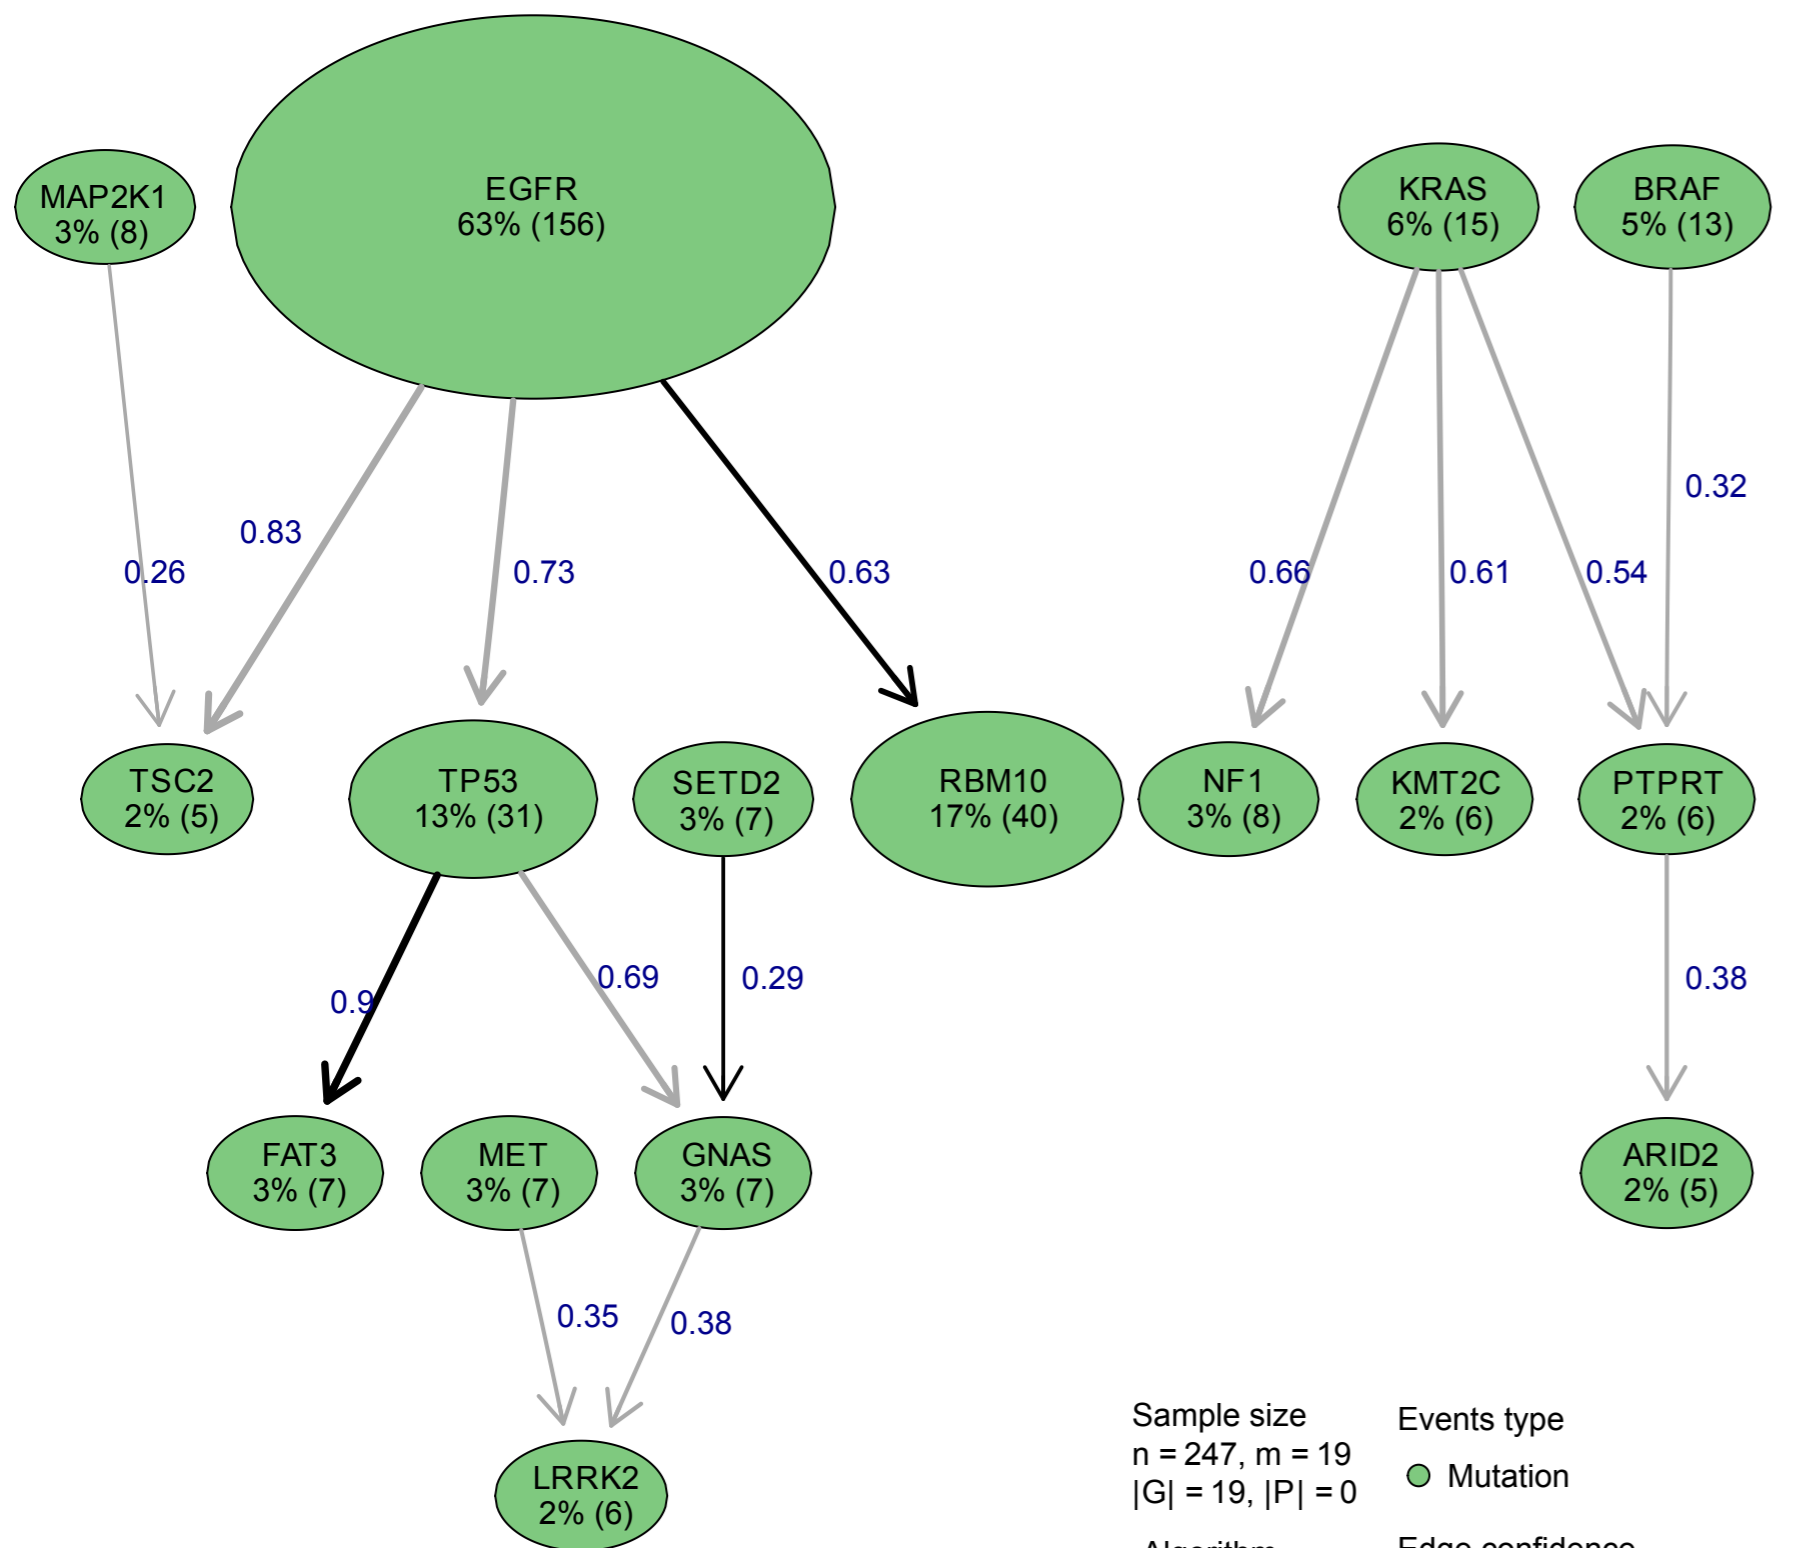**B** CAPRI – WES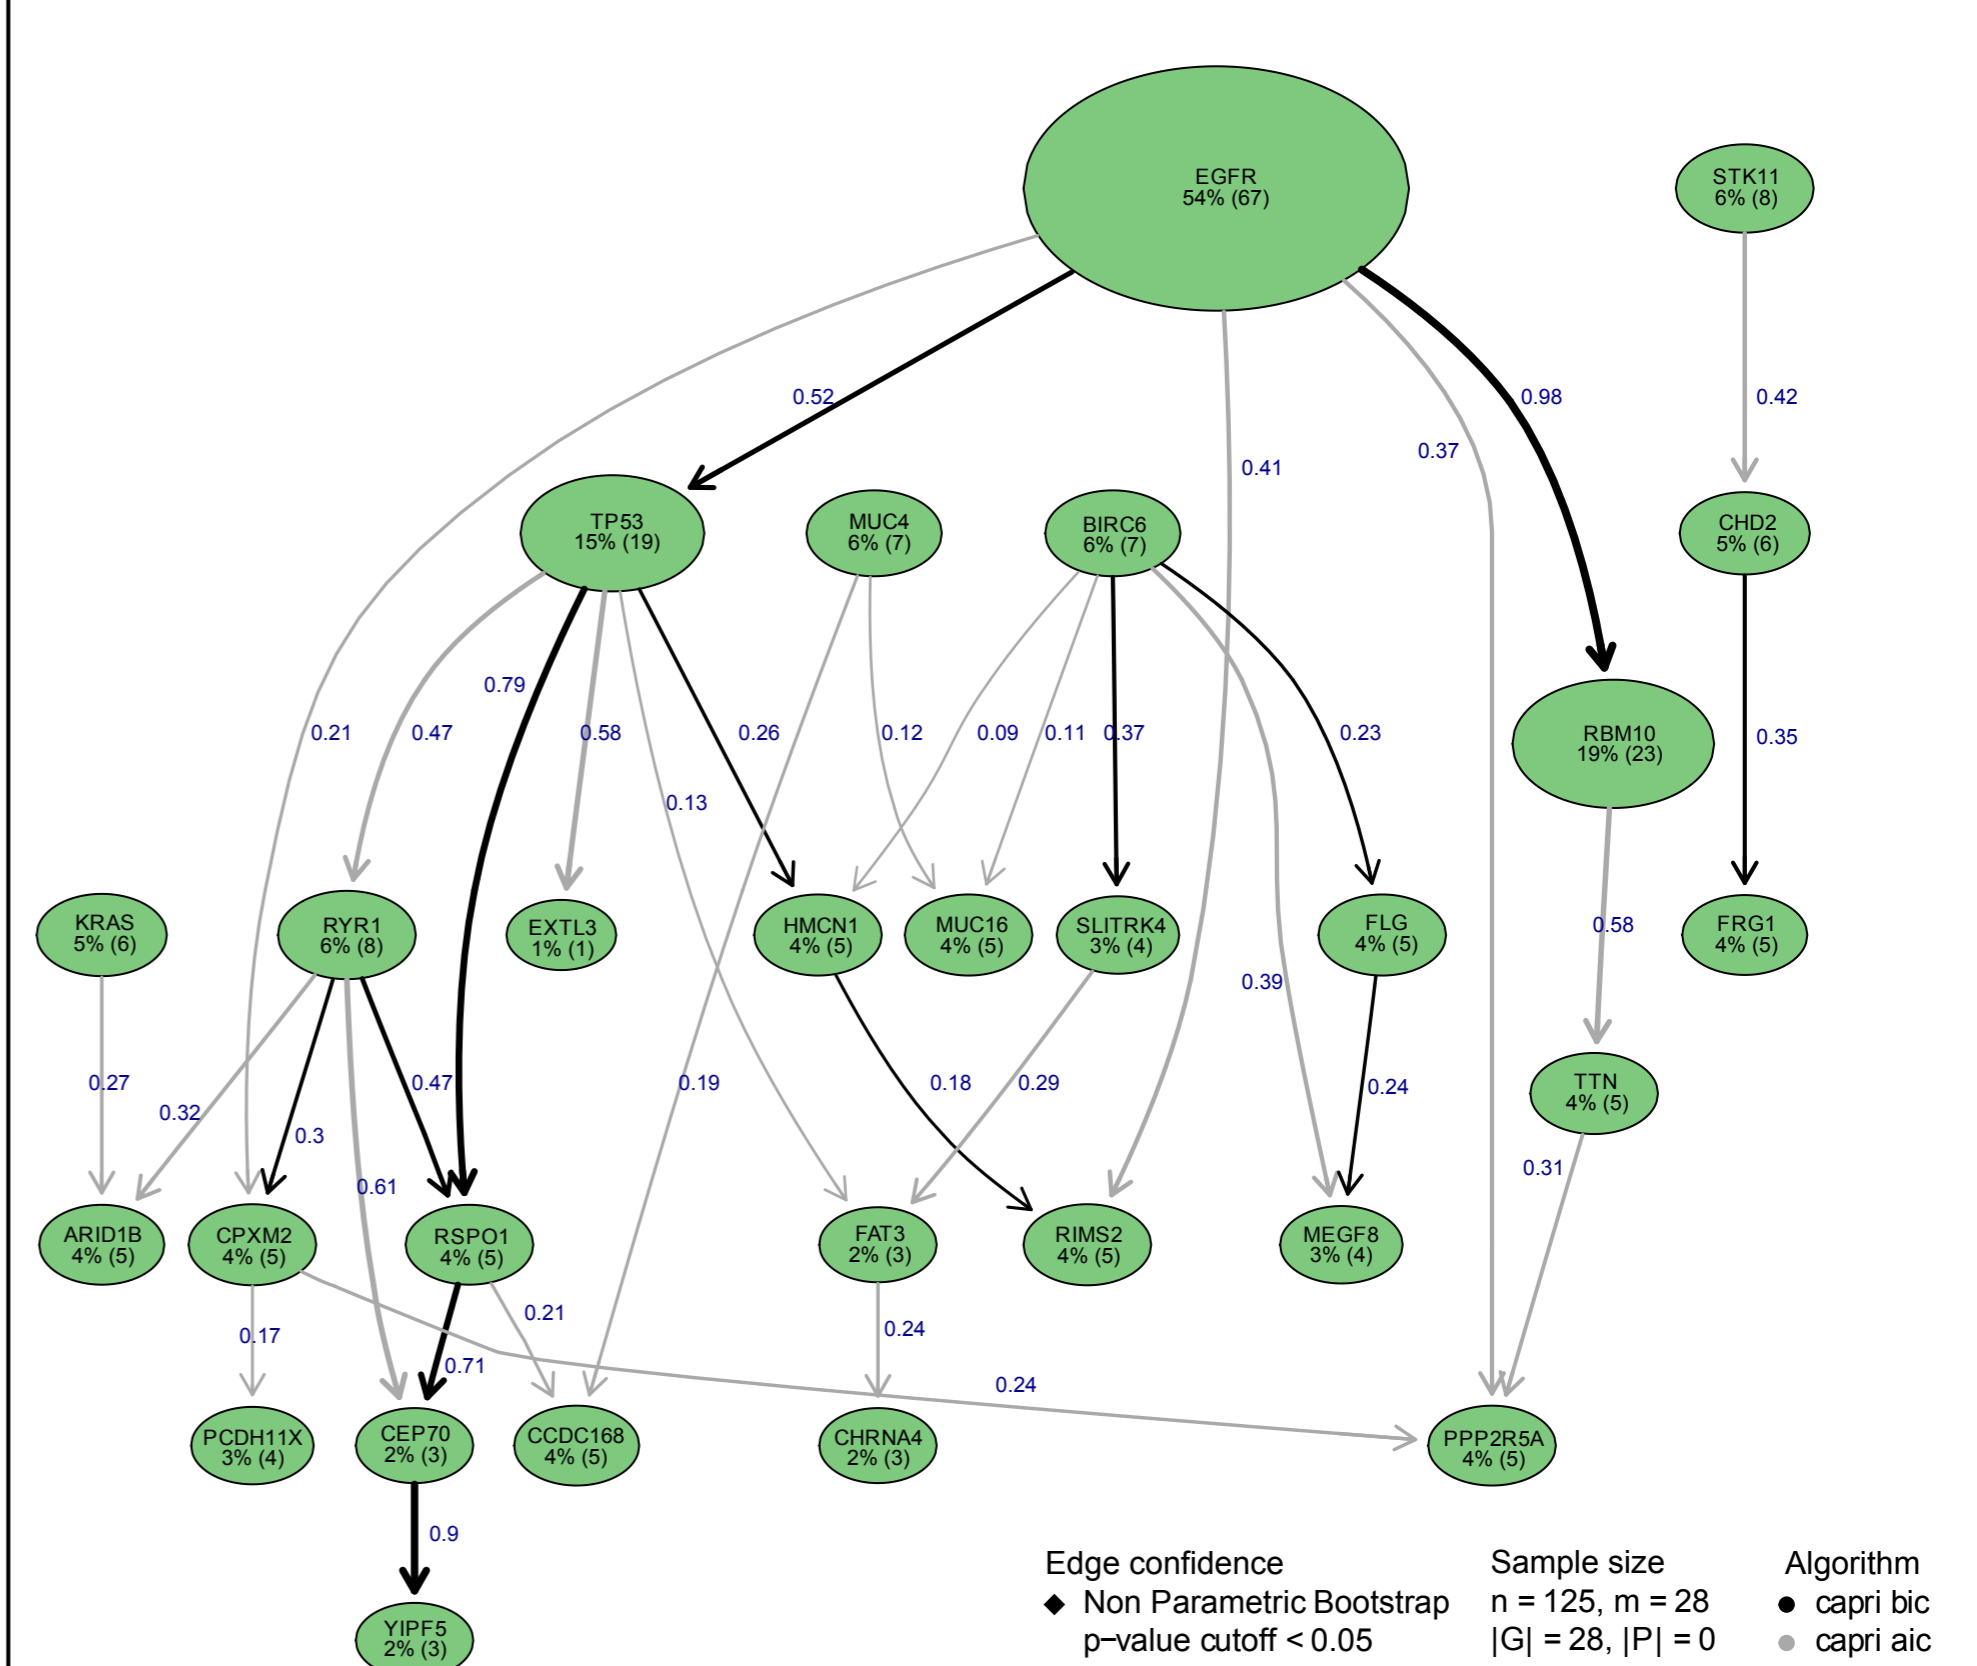



Supplementary Figure 9

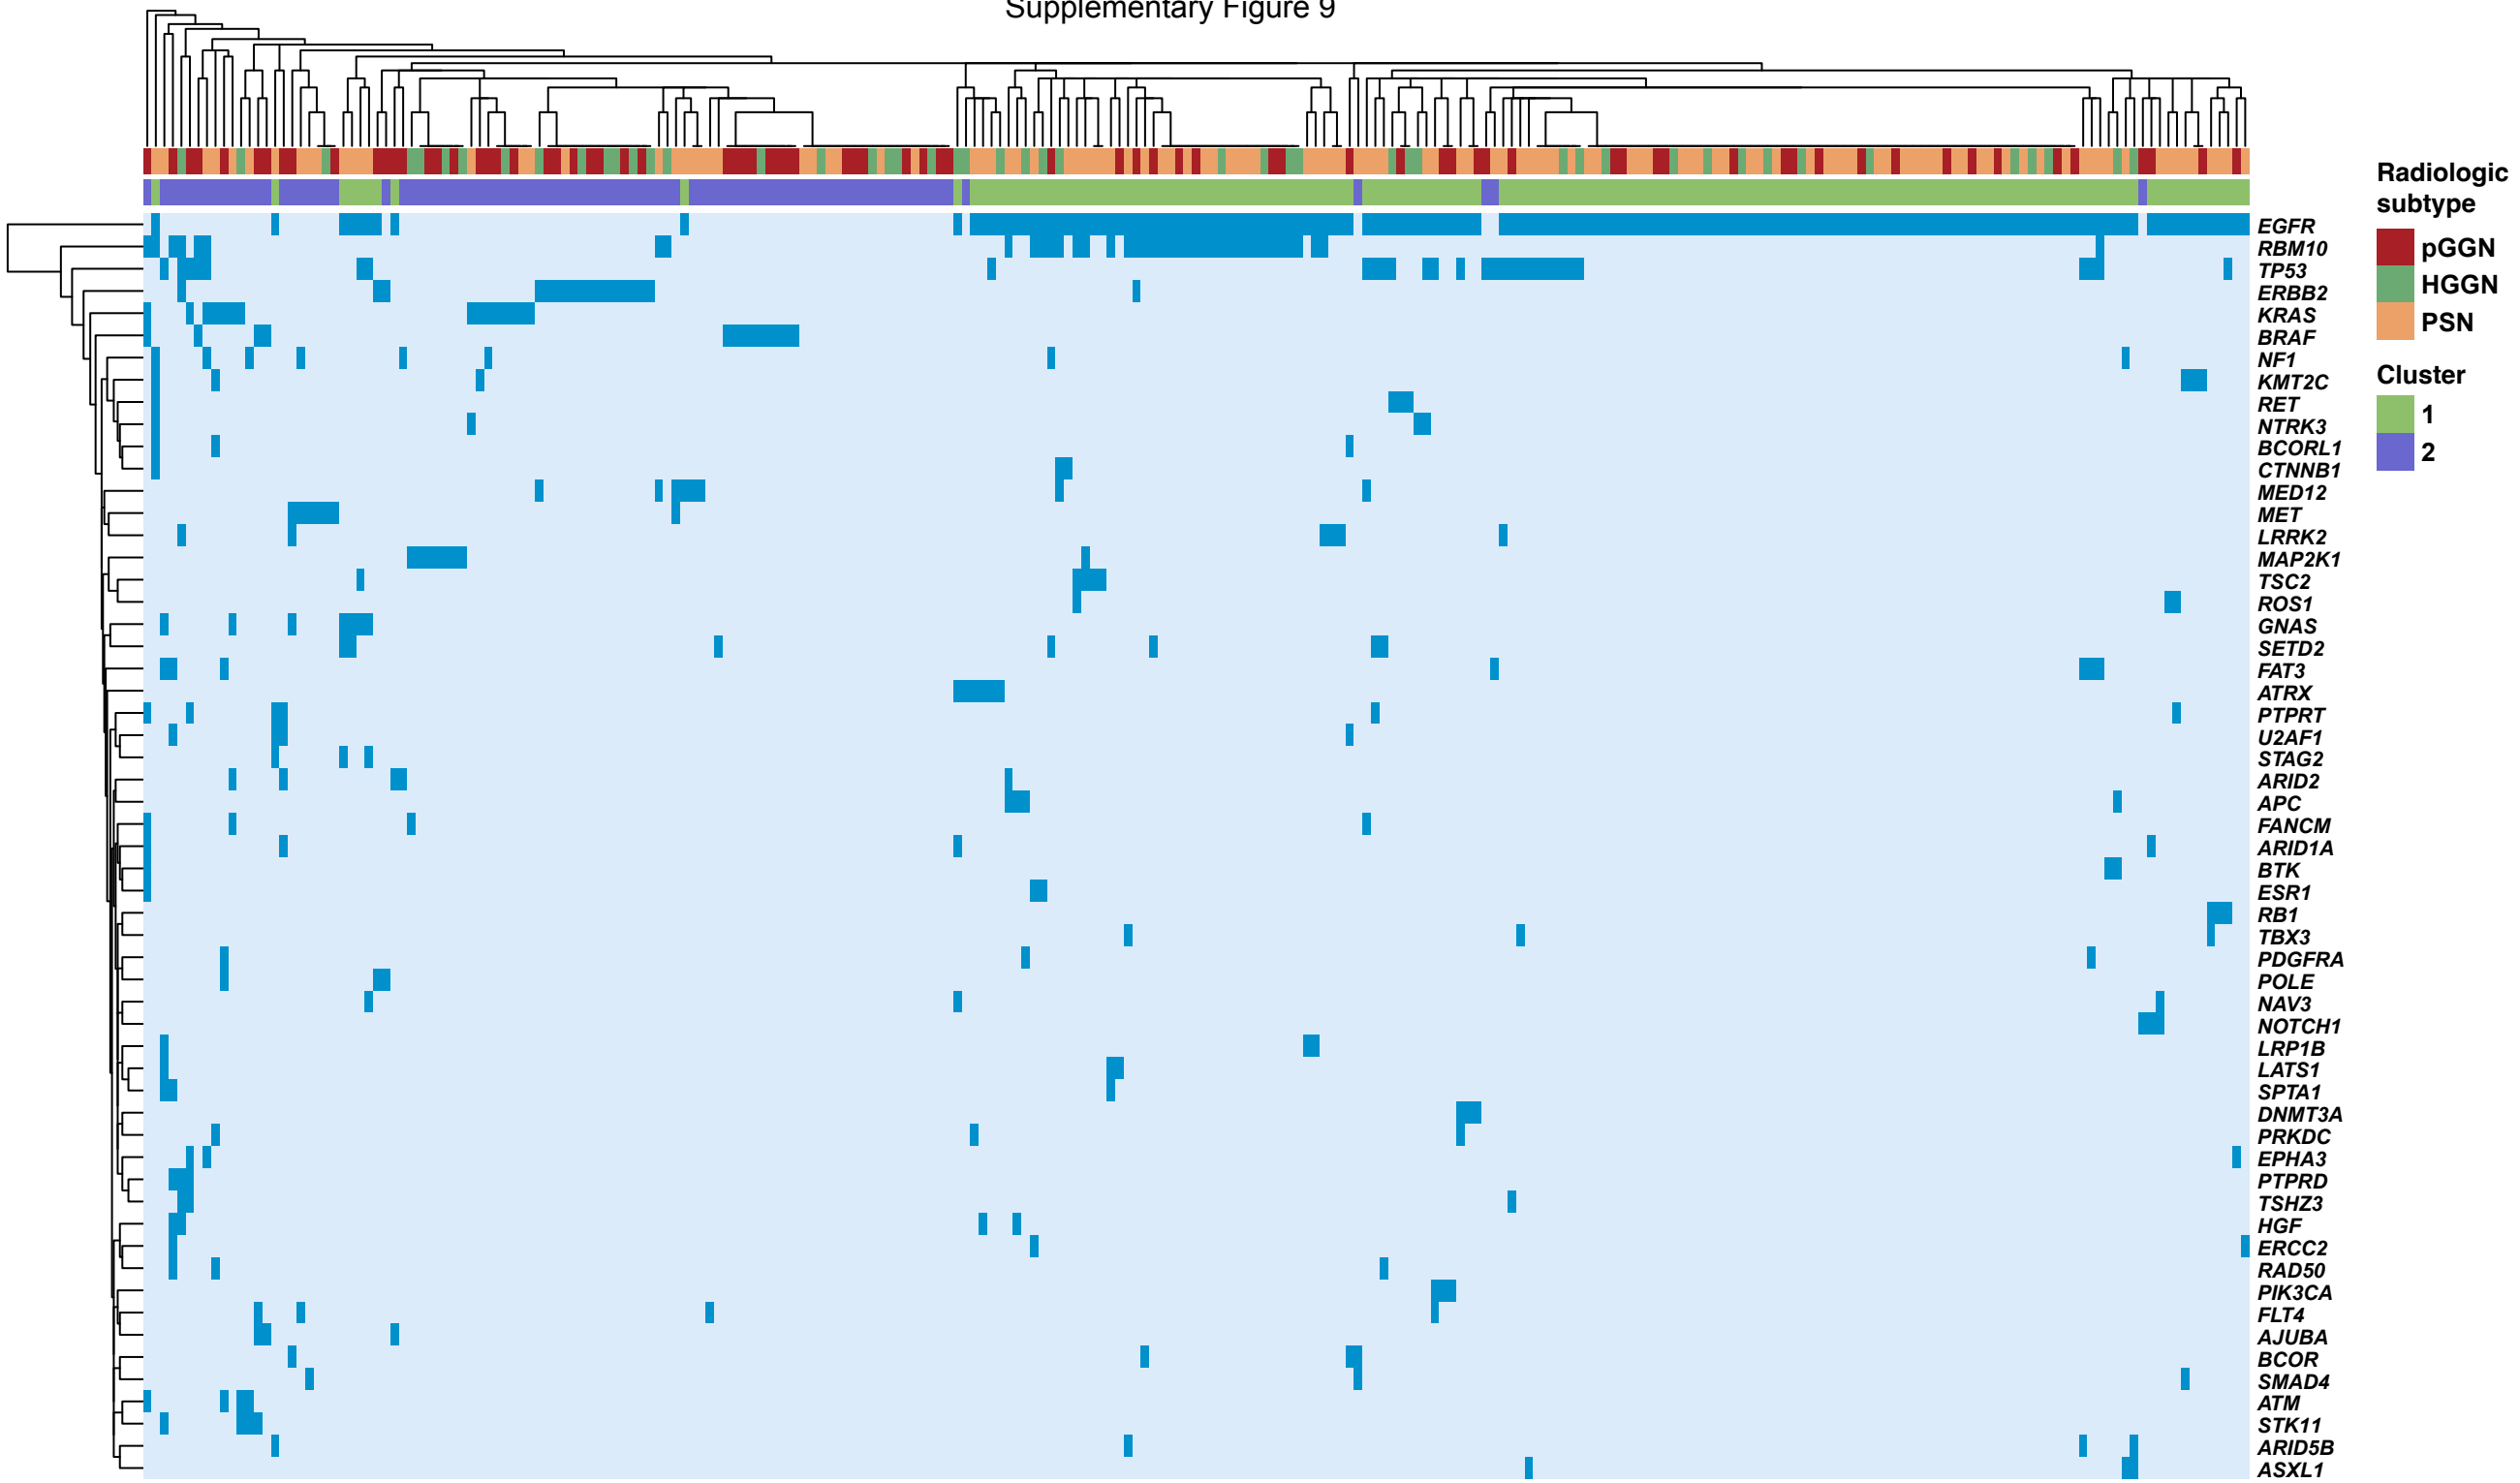

1 **SUPPLEMENTARY FIGURE LEGENDS**

2 **Supplementary Figure 1.** Flow diagram of the broad-panel NGS cohort.

3 **Supplementary Figure 2.** Classification of subsolid nodules. (A) and (B) showed pure ground-glass  
4 nodules, which consisted of homogeneous opacities in the lung window. No solid component was  
5 observed in the mediastinal window. (C) and (D) illustrated heterogeneous ground-glass nodules,  
6 which harbored a solid component (*black arrow*) in only the lung window but not in the mediastinal  
7 window. (E) and (F) exhibited part-solid nodules, which possessed a solid component both in the lung  
8 window (*black arrow*) and in the mediastinal window (*white arrow*).

9 **Supplementary Figure 3.** Feature selection with LASSO in the broad-panel NGS cohort. LASSO  
10 negative binomial regression model was built incorporating both clinicopathologic characteristics and  
11 radiological parameters. (A) Red dots indicated average deviance values for each model with a given  
12  $\lambda$ ; the dotted vertical lines were drawn at the optimal values using the minimum mean square error  
13 (MSE) criteria. The optimal  $\lambda$  value of 0.304 was selected. (B) The process of feature selection and  
14 resulting features with nonzero coefficients: smoking (0.212), predominant histology (0.124), age  
15 (0.008), total size in the lung window (0.005), and solid size in the mediastinal window (0.002).  
16 LASSO, least absolute shrinkage and selection operator.

17 **Supplementary Figure 4.** Association between radiological subtype and genomic features in the WES  
18 cohort. (A) Oncoprint of the most frequently mutated genes (top 20) by radiological subtype. (B) Box  
19 plot of TMB versus radiological subtype. (C) Comparison of mutation frequency of top 20 genes  
20 among radiological subtypes. Genes with significant differences using Fisher's exact test were labeled  
21 with *asterisks* (FDR  $q < 0.100$ ), while those with significant differences in Cochran-Armitage test for  
22 trend were highlighted in *red* ( $P < 0.050$ ). TMB, tumor mutational burden.

23 **Supplementary Figure 5.** Figure legend: Association between radiological subtype and genomic  
24 features in the IAC cohort. (A) Box plot of tumor mutation count versus radiological subtype. (B) Box  
25 plot of genomic alteration count versus radiological subtype. (C) Box plot of the MATH score versus  
26 radiological subtype. Significant differences were labeled with asterisks ( $P < 0.050$ ). (D) Comparison  
27 of mutation frequency of driver genes among radiological subtypes. (E) Comparison of alteration  
28 frequency of oncogenic pathways among radiological subtypes. Significant differences conducted by  
29 Fisher's exact test were labeled with *asterisks*, while those calculated by Cochran-Armitage test for  
30 trend were highlighted in *red* ( $P < 0.050$ ).

31 **Supplementary Figure 6.** Oncogenic pathway analyses in the WES cohort. (A) Oncoprint of altered

32 oncogenic pathways by radiological subtype. Pathway alterations were presented by increasing NPA.  
33 (B) Comparison of alteration frequency of oncogenic pathways among radiological subtypes.  
34 Pathways with significant differences using Fisher's exact test were labeled with *asterisks* (FDR  $q <$   
35  $0.100$ ), while those with significant differences in Cochran-Armitage test for trend were highlighted  
36 in *red* ( $P < 0.050$ ). (C) Frequency of NPA versus radiological subtype. Darker tones indicate higher  
37 alteration frequencies. NPA, number of pathway alteration.

38 **Supplementary Figure 7.** Co-occurrence (*red*) and mutual exclusivity (*blue*) analyses of oncogenic  
39 pathway in the broad-panel NGS cohort. (A), (B), (C), and (D) showed the results in SSN, pGGN,  
40 HGGN, and PSN cohorts respectively.

41 **Supplementary Figure 8.** Cancer evolution models in (A) the broad-panel NGS and (B) the WES  
42 cohorts detected by CAPRI algorithm. High-frequent somatic mutations were input in the models. The  
43 edge label represented relation confidence estimated with 100 non-parametric bootstrap (NPB score)  
44 iterations. Edges with  $P < 0.050$  were preserved. CAPRI, cancer progression inference.

45 **Supplementary Figure 9.** Gene-based somatic mutation clustering analyses in the broad-panel NGS  
46 cohort.

|                                 |                  |                                                                                |
|---------------------------------|------------------|--------------------------------------------------------------------------------|
| <b>Supplementary<br/>Tables</b> | <b>Table S1</b>  | Broad-Panel NGS Gene                                                           |
|                                 | <b>Table S2</b>  | Clinicopathologic Characteristics by Radiological Subtype (WES Cohort)         |
|                                 | <b>Table S3</b>  | Negative Binomial Regression Analysis on Association with TMB (WES Cohort)     |
|                                 | <b>Table S4</b>  | Driver Gene Identification by dNdScv Algorithm                                 |
|                                 | <b>Table S5</b>  | Driver Gene Frequency Comparison between Radiologic Subtypes                   |
|                                 | <b>Table S6</b>  | Top 20 Gene Frequency Comparison between Radiologic Subtypes (WES Cohort)      |
|                                 | <b>Table S7</b>  | Driver Gene Frequency Comparison between Radiologic Subtypes (IAC)             |
|                                 | <b>Table S8</b>  | Co-occurrence and Mutual Exclusivity of Driver Gene in the Entire Cohort       |
|                                 | <b>Table S9</b>  | Co-occurrence and Mutual Exclusivity of Driver Gene in pGGN Cohort             |
|                                 | <b>Table S10</b> | Co-occurrence and Mutual Exclusivity of Driver Gene in HGGN Cohort             |
|                                 | <b>Table S11</b> | Co-occurrence and Mutual Exclusivity of Driver Gene in PSN Cohort              |
|                                 | <b>Table S12</b> | Pathway Alteration Comparison between Radiologic Subtypes                      |
|                                 | <b>Table S13</b> | Pathway Alteration Comparison between Radiologic Subtypes (WES Cohort)         |
|                                 | <b>Table S14</b> | Pathway Alteration Comparison between Radiologic Subtypes (IAC)                |
|                                 | <b>Table S15</b> | Co-occurrence and Mutual Exclusivity of Oncogenic Pathway in the Entire Cohort |
|                                 | <b>Table S16</b> | Co-occurrence and Mutual Exclusivity of Oncogenic Pathway in pGGN Cohort       |
|                                 | <b>Table S17</b> | Co-occurrence and Mutual Exclusivity of Oncogenic Pathway in HGGN Cohort       |
|                                 | <b>Table S18</b> | Co-occurrence and Mutual Exclusivity of Oncogenic Pathway in PSN Cohort        |
|                                 | <b>Table S19</b> | Mutational Signature (WES Cohort)                                              |

47

48 Table S1. Broad-Panel NGS Gene

| <b>HR363</b> | <b>HR456</b> | <b>RS520</b> |
|--------------|--------------|--------------|
| ABL1         | ABL1         | ABL1         |
| ACVR1B       | ACVR1B       | ABL2         |
| ACVR2A       | ACVR2A       | ACVR1        |
| AJUBA        | AJUBA        | ACVR1B       |
| AKT1         | AKT1         | ADGRA2       |
| AKT2         | AKT2         | AKT1         |
| AKT3         | AKT3         | AKT2         |
| ALK          | ALK          | AKT3         |
| AMER1        | ALOX12B      | ALK          |
| APC          | AMER1        | ALOX12B      |
| AR           | APC          | ANKRD11      |
| ARHGAP35     | AR           | APC          |

|          |          |              |
|----------|----------|--------------|
| ARHGEF12 | ARAF     | AR           |
| ARID1A   | ARFRP1   | ARAF         |
| ARID2    | ARHGAP35 | ARID1A       |
| ARID5B   | ARHGEF12 | ARID1B       |
| ASXL1    | ARID1A   | ARID2        |
| ATM      | ARID2    | ARID5B       |
| ATR      | ARID5B   | ASXL1        |
| ATRX     | ASXL1    | ASXL2        |
| AURKA    | ATM      | ATF1         |
| AURKB    | ATR      | ATM          |
| AXIN2    | ATRX     | ATR          |
| AXL      | AURKA    | ATRX         |
| B2M      | AURKB    | AURKA        |
| B4GALT3  | AXIN1    | AURKB        |
| BAGE     | AXIN2    | AXIN1        |
| BAP1     | AXL      | AXIN2        |
| BARD1    | B2M      | AXL          |
| BCL2     | B4GALT3  | B2M          |
| BCL2L1   | BAGE     | BAP1         |
| BCL6     | BAP1     | BARD1        |
| BLM      | BARD1    | BCL2         |
| BMPR1A   | BCL2     | BCL2L1       |
| BRAF     | BCL2L1   | BCL6         |
| BRCA1    | BCL2L2   | BCOR         |
| BRCA2    | BCL6     | BCORL1       |
| BRIP1    | BCOR     | BCR          |
| BTK      | BCORL1   | BIRC3        |
| BTLA     | BLM      | BLM          |
| CARD11   | BMPR1A   | BMPR1A       |
| CBFB     | BRAF     | BRAF         |
| CBL      | BRCA1    | BRCA1        |
| CCND1    | BRCA2    | BRCA2        |
| CCND2    | BRD4     | BRD4         |
| CCNE1    | BRIP1    | BRIP1        |
| CD160    | BTG1     | BTK          |
| CD244    | BTG2     | CARD11       |
| CD274    | BTK      | CASP8        |
| CD276    | BTLA     | CBFB         |
| CD28     | CALR     | CBL          |
| CD38     | CARD11   | <i>CCND1</i> |
| CD48     | CASP8    | CCND2        |
| CD69     | CBFB     | CCND3        |
| CD79B    | CBL      | CCNE1        |

|        |        |             |
|--------|--------|-------------|
| CD80   | CCND1  | CD274       |
| CD86   | CCND2  | CD79A       |
| CDC73  | CCND3  | CD79B       |
| CDH1   | CCNE1  | CDC73       |
| CDK12  | CD160  | CDH1        |
| CDK4   | CD22   | CDK12       |
| CDK6   | CD244  | <i>CDK4</i> |
| CDK8   | CD274  | <i>CDK6</i> |
| CDKN1A | CD276  | CDK8        |
| CDKN1B | CD28   | CDKN1A      |
| CDKN2A | CD38   | CDKN1B      |
| CDKN2B | CD48   | CDKN1C      |
| CDKN2C | CD69   | CDKN2A      |
| CEBPA  | CD70   | CDKN2B      |
| CHEK1  | CD79A  | CDKN2C      |
| CHEK2  | CD79B  | CEBPA       |
| CIC    | CD80   | CHD1        |
| CREBBP | CD86   | CHD2        |
| CRIPAK | CDC73  | CHD4        |
| CRKL   | CDH1   | CHEK1       |
| CSF1R  | CDK12  | CHEK2       |
| CTAG2  | CDK4   | CHUK        |
| CTCF   | CDK6   | CIC         |
| CTLA4  | CDK8   | CREBBP      |
| CTNNA1 | CDKN1A | CRKL        |
| CTNNB1 | CDKN1B | CRLF2       |
| DAXX   | CDKN2A | CSF1R       |
| DDR2   | CDKN2B | CSF3R       |
| DICER1 | CDKN2C | CTCF        |
| DNMT3A | CEBPA  | CTNNB1      |
| EGFR   | CHEK1  | CUL3        |
| EGR3   | CHEK2  | CUL4A       |
| EIF4A2 | CIC    | CUL4B       |
| ELF3   | CREBBP | CYLD        |
| EOMES  | CRIPAK | DAXX        |
| EP300  | CRKL   | DDR2        |
| EPCAM  | CSF1R  | DICER1      |
| EPHA1  | CSF3R  | DNMT1       |
| EPHA2  | CTAG2  | DNMT3A      |
| EPHA3  | CTCF   | DNMT3B      |
| EPHB1  | CTLA4  | DOT1L       |
| EPHB6  | CTNNA1 | <i>EGFR</i> |
| EPPK1  | CTNNB1 | EIF4E       |

|         |         |              |
|---------|---------|--------------|
| ERBB2   | CUL3    | ELOC         |
| ERBB3   | CUL4A   | EMSY         |
| ERBB4   | CXCR4   | EP300        |
| ERCC2   | CYP17A1 | EPCAM        |
| ERCC3   | DAXX    | EPHA2        |
| ERCC4   | DDR1    | EPHA3        |
| ERCC5   | DDR2    | EPHA5        |
| ERG     | DICER1  | EPHA7        |
| ESR1    | DIS3    | EPHB1        |
| ETV1    | DNMT3A  | <i>ERBB2</i> |
| EZH2    | DOT1L   | ERBB3        |
| FANCA   | EED     | ERBB4        |
| FANCC   | EGFR    | ERCC1        |
| FANCM   | EGR3    | ERCC2        |
| FBXW7   | EIF4A2  | ERG          |
| FGF19   | ELF3    | ERRFI1       |
| FGF3    | EMSY    | ESR1         |
| FGF4    | EOMES   | EWSR1        |
| FGFR1   | EP300   | EZH2         |
| FGFR2   | EPCAM   | FAM175A      |
| FGFR3   | EPHA1   | FANCA        |
| FGFR4   | EPHA2   | FANCC        |
| FH      | EPHA3   | FANCD2       |
| FLCN    | EPHB1   | FANCE        |
| FLT1    | EPHB4   | FANCG        |
| FLT3    | EPHB6   | FANCI        |
| FLT4    | EPPK1   | FANCL        |
| FOXA1   | ERBB2   | FAT1         |
| FOXA2   | ERBB3   | FAT3         |
| FOXL2   | ERBB4   | FBXW7        |
| FOXO3   | ERCC2   | FCGR2B       |
| FOXP1   | ERCC3   | FGF12        |
| FRK     | ERCC4   | FGF14        |
| GAGE1   | ERCC5   | <i>FGF19</i> |
| GALNT12 | ERG     | <i>FGF3</i>  |
| GATA1   | ERRFI1  | <i>FGF4</i>  |
| GATA2   | ESR1    | FGFR1        |
| GATA3   | ETV1    | FGFR2        |
| GNA11   | EZH2    | FGFR3        |
| GNAQ    | FAM46C  | FGFR4        |
| GNAS    | FANCA   | FH           |
| GREM1   | FANCC   | FLCN         |
| H3F3C   | FANCG   | FLT1         |

|           |         |          |
|-----------|---------|----------|
| HAVCR2    | FANCL   | FLT3     |
| HDAC1     | FANCM   | FLT4     |
| HDAC2     | FAS     | FOXO1    |
| HDAC3     | FBXW7   | FOXP1    |
| HDAC6     | FGF10   | FRS2     |
| HGF       | FGF12   | FUBP1    |
| HIST1H1C  | FGF14   | FYN      |
| HIST1H2BD | FGF19   | GABRA6   |
| HNF1A     | FGF23   | GALNT12  |
| HRAS      | FGF3    | GATA1    |
| ICOS      | FGF4    | GATA2    |
| ICOSLG    | FGF6    | GATA3    |
| IDH1      | FGFR1   | GATA6    |
| IDH2      | FGFR2   | GLI1     |
| IGF1R     | FGFR3   | GNA11    |
| IGF2      | FGFR4   | GNAQ     |
| IKBKE     | FH      | GNAS     |
| IKZF1     | FLCN    | GRIN2A   |
| IL7R      | FLT1    | GRM3     |
| INSR      | FLT3    | GSK3B    |
| IRF4      | FLT4    | GSTM1    |
| IRS2      | FOXA1   | GSTT1    |
| ITK       | FOXA2   | H3F3A    |
| JAK1      | FOXL2   | HDAC1    |
| JAK2      | FOXO3   | HDAC2    |
| JAK3      | FOXP1   | HDAC4    |
| JUN       | FRK     | HGF      |
| KDM5C     | FUBP1   | HIST1H3F |
| KDM6A     | GABRA6  | HLA-A    |
| KDR       | GAGE1   | HNF1A    |
| KEAP1     | GALNT12 | HNF1B    |
| KIT       | GATA1   | HRAS     |
| KITLG     | GATA2   | HSP90AA1 |
| KMT2B     | GATA3   | IDH1     |
| KMT2C     | GATA4   | IDH2     |
| KMT2D     | GATA6   | IGF1     |
| KRAS      | GID4    | IGF1R    |
| LAG3      | GNA11   | IGF2     |
| LCK       | GNA13   | IKBKE    |
| LEF1      | GNAQ    | IKZF1    |
| LIFR      | GNAS    | IL7R     |
| LIMK1     | GREM1   | INHBA    |
| LRRK2     | GRM3    | INPP4A   |



|          |           |             |
|----------|-----------|-------------|
| LYN      | GSK3B     | INPP4B      |
| MAGEA1   | H3F3A     | INSR        |
| MAGEA12  | H3F3C     | IRF2        |
| MAGEA3   | HAVCR2    | IRF4        |
| MAGEA4   | HDAC1     | IRS2        |
| MAGEC2   | HDAC2     | JAK1        |
| MAP2K1   | HDAC3     | JAK2        |
| MAP2K2   | HDAC6     | JAK3        |
| MAP2K4   | HGF       | KAT6A       |
| MAP3K1   | HIST1H1C  | KDM5A       |
| MAPK1    | HIST1H2BD | KDM5C       |
| MAPK11   | HNF1A     | KDM6A       |
| MAPK8IP1 | HRAS      | KDR         |
| MCL1     | HSD3B1    | KEAP1       |
| MDM2     | ICOS      | KEL         |
| MDM4     | ICOSLG    | KIT         |
| MECOM    | ID3       | KMT2A       |
| MEN1     | IDH1      | KMT2C       |
| MERTK    | IDH2      | KMT2D       |
| MET      | IGF1R     | <i>KRAS</i> |
| MGMT     | IGF2      | LATS1       |
| MITF     | IKBKE     | LATS2       |
| MLH1     | IKZF1     | LMO1        |
| MLH3     | IL7R      | LRP1B       |
| MPL      | INPP4B    | MAGI2       |
| MRE11    | INSR      | MAP2K1      |
| MSH2     | IRF2      | MAP2K2      |
| MSH3     | IRF4      | MAP2K4      |
| MSH6     | IRS2      | MAP3K1      |
| MST1R    | ITK       | MAP3K13     |
| MTOR     | JAK1      | MAPK3       |
| MUTYH    | JAK2      | MAX         |
| MYC      | JAK3      | MCL1        |
| MYCL     | JUN       | MDC1        |
| MYCN     | KDM5A     | MDM2        |
| MYD88    | KDM5C     | MDM4        |
| NAV3     | KDM6A     | MED12       |
| NBN      | KDR       | MEF2B       |
| NCOA4    | KEAP1     | MEN1        |
| NCOR1    | KEL       | <i>MET</i>  |
| NEK11    | KIT       | MITF        |
| NF1      | KITLG     | MLH1        |
| NF2      | KLHL6     | MLH3        |

|          |          |        |
|----------|----------|--------|
| NFE2L2   | KMT2A    | MPL    |
| NFE2L3   | KMT2B    | MRE11A |
| NKX2-1   | KMT2C    | MSH2   |
| NOTCH1   | KMT2D    | MSH3   |
| NOTCH2   | KRAS     | MSH6   |
| NOTCH4   | LAG3     | MST1   |
| NPM1     | LCK      | MST1R  |
| NRAS     | LEF1     | MTOR   |
| NSD1     | LIFR     | MUTYH  |
| NT5E     | LIMK1    | MYC    |
| NTRK1    | LRRK2    | MYCL   |
| NTRK2    | LTK      | MYCN   |
| NTRK3    | LYN      | MYD88  |
| PALB2    | MAF      | NBN    |
| PARP1    | MAGEA1   | NCOR1  |
| PARP2    | MAGEA12  | NEB    |
| PARP3    | MAGEA3   | NF1    |
| PAX5     | MAGEA4   | NF2    |
| PBRM1    | MAGEC2   | NFE2L2 |
| PCBP1    | MAP2K1   | NFKBIA |
| PCNA     | MAP2K2   | NKX2-1 |
| PDCD1    | MAP2K4   | NOTCH1 |
| PDCD1LG2 | MAP3K1   | NOTCH2 |
| PDGFRA   | MAP3K13  | NOTCH3 |
| PDGFRB   | MAPK1    | NOTCH4 |
| PHF6     | MAPK11   | NPM1   |
| PHOX2B   | MAPK8IP1 | NR4A3  |
| PIGF     | MCL1     | NRAS   |
| PIK3CA   | MDM2     | NRG1   |
| PIK3CB   | MDM4     | NSD1   |
| PIK3CD   | MECOM    | NTHL1  |
| PIK3CG   | MED12    | NTRK1  |
| PIK3R1   | MEF2B    | NTRK2  |
| PIK3R2   | MEN1     | NTRK3  |
| PIM1     | MERTK    | NUP93  |
| PMS1     | MET      | PAK1   |
| PMS2     | MGMT     | PAK3   |
| POLD1    | MITF     | PAK7   |
| POLE     | MKKN1    | PALB2  |
| POLQ     | MLH1     | PARK2  |
| PPM1D    | MLH3     | PARP2  |
| PPP2R1A  | MPL      | PARP3  |
| PRDM1    | MRE11A   | PARP4  |

|         |        |         |
|---------|--------|---------|
| PRF1    | MSH2   | PAX5    |
| PRKAR1A | MSH3   | PBRM1   |
| PRX     | MSH6   | PDGFRA  |
| PTCH1   | MST1R  | PDGFRB  |
| PTEN    | MTAP   | PGR     |
| PTK6    | MTOR   | PIK3C2G |
| PTPN11  | MUTYH  | PIK3CA  |
| PTPRD   | MYC    | PIK3CB  |
| PTPRK   | MYCL   | PIK3CD  |
| PTPRT   | MYCN   | PIK3CG  |
| RAD21   | MYD88  | PIK3R1  |
| RAD50   | NAV3   | PIK3R2  |
| RAD51C  | NBN    | PIM1    |
| RAD51D  | NCOA4  | PLCG2   |
| RAF1    | NCOR1  | PMS1    |
| RARA    | NEK11  | PMS2    |
| RB1     | NF1    | POLD1   |
| RECQL   | NF2    | POLE    |
| RECQL4  | NFE2L2 | PPP2R1A |
| REL     | NFE2L3 | PPP2R2A |
| RET     | NFKBIA | PPP6C   |
| ROS1    | NKX2-1 | PRDM1   |
| RPA1    | NOTCH1 | PREX2   |
| RPA2    | NOTCH2 | PRKAR1A |
| RPA3    | NOTCH3 | PRKDC   |
| RPL22   | NOTCH4 | PTCH1   |
| RPL5    | NPM1   | PTEN    |
| RUNX1   | NRAS   | PTK2    |
| SDHA    | NSD1   | PTPN11  |
| SDHB    | NT5C2  | PTPRD   |
| SDHC    | NT5E   | PTPRS   |
| SDHD    | NTRK1  | PTPRT   |
| SETBP1  | NTRK2  | QKI     |
| SETD2   | NTRK3  | RAC1    |
| SF3B1   | P2RY8  | RAD50   |
| SH2D1A  | PALB2  | RAD51   |
| SIK1    | PARK2  | RAD51B  |
| SIN3A   | PARP1  | RAD51C  |
| SLAMF7  | PARP2  | RAD51D  |
| SMAD2   | PARP3  | RAD52   |
| SMAD4   | PAX5   | RAD54L  |
| SMARCA4 | PBRM1  | RAF1    |
| SMARCB1 | PCBP1  | RARA    |

|          |          |         |
|----------|----------|---------|
| SMC1A    | PCNA     | RASA1   |
| SMC3     | PDCD1    | RB1     |
| SMO      | PDCD1LG2 | RBM10   |
| SOCS1    | PDGFRA   | RECQL4  |
| SOX17    | PDGFRB   | RET     |
| SOX2     | PDK1     | RHOA    |
| SOX9     | PHF6     | RICTOR  |
| SPATA2   | PHOX2B   | RNF43   |
| SPOP     | PIGF     | ROS1    |
| SRC      | PIK3C2B  | RPS6KA4 |
| STAG2    | PIK3C2G  | RPS6KB2 |
| STK11    | PIK3CA   | RPTOR   |
| SUFU     | PIK3CB   | RUNX1   |
| SYK      | PIK3CD   | RUNX1T1 |
| TAF1     | PIK3CG   | SDHA    |
| TAS2R38  | PIK3R1   | SDHB    |
| TBL1XR1  | PIK3R2   | SDHC    |
| TBX3     | PIM1     | SDHD    |
| TEK      | PMS1     | SETD2   |
| TET1     | PMS2     | SF3B1   |
| TET2     | POLD1    | SH2B3   |
| TGFB1    | POLE     | SLIT2   |
| TGFBR2   | POLQ     | SLX4    |
| TLR4     | PPARG    | SMAD2   |
| TNF      | PPM1D    | SMAD3   |
| TNFAIP3  | PPP2R1A  | SMAD4   |
| TNFRSF14 | PPP2R2A  | SMARCA4 |
| TNFRSF18 | PRDM1    | SMARCB1 |
| TNFRSF4  | PRF1     | SMARCD1 |
| TNFSF11  | PRKAR1A  | SMO     |
| TNFSF14  | PRKCI    | SNCAIP  |
| TNFSF18  | PRX      | SOX9    |
| TNFSF4   | PTCH1    | SPEN    |
| TOP1     | PTEN     | SPOP    |
| TP53     | PTK6     | SPTA1   |
| TSC1     | PTPN11   | SRC     |
| TSC2     | PTPRD    | SRSF2   |
| TSHR     | PTPRK    | STAG2   |
| TSHZ2    | PTPRO    | STAT3   |
| TSHZ3    | PTPRT    | STAT5A  |
| TYRO3    | QKI      | STAT5B  |
| U2AF1    | RAC1     | STK11   |
| USP9X    | RAD21    | STK40   |

|       |         |          |
|-------|---------|----------|
| VEGFA | RAD50   | SUFU     |
| VEGFB | RAD51   | SYK      |
| VEZF1 | RAD51B  | TAF1     |
| VHL   | RAD51C  | TBX3     |
| VTCN1 | RAD51D  | TCF3     |
| WT1   | RAD52   | TCF7L2   |
| XPO1  | RAD54L  | TERT     |
| XRCC2 | RAF1    | TET2     |
| NA    | RARA    | TGFBR2   |
| NA    | RB1     | TMPRSS2  |
| NA    | RBM10   | TNFAIP3  |
| NA    | RECQL   | TNFRSF14 |
| NA    | RECQL4  | TNFSF11  |
| NA    | REL     | TOP1     |
| NA    | RET     | TP53     |
| NA    | RICTOR  | TP63     |
| NA    | RNF43   | TRAF2    |
| NA    | ROS1    | TRAF7    |
| NA    | RPA1    | TRRAP    |
| NA    | RPA2    | TSC1     |
| NA    | RPA3    | TSC2     |
| NA    | RPL22   | TSHR     |
| NA    | RPL5    | U2AF1    |
| NA    | RPTOR   | VEGFA    |
| NA    | RUNX1   | VHL      |
| NA    | SDHA    | WRN      |
| NA    | SDHB    | WT1      |
| NA    | SDHC    | XPO1     |
| NA    | SDHD    | XRCC2    |
| NA    | SETBP1  | YES1     |
| NA    | SETD2   | ZFHX3    |
| NA    | SF3B1   | ZNF217   |
| NA    | SGK1    | ZNF703   |
| NA    | SH2D1A  | ZNRF3    |
| NA    | SIK1    | AMER1    |
| NA    | SIN3A   | APCDD1   |
| NA    | SLAMF7  | ARFRP1   |
| NA    | SMAD2   | BACH1    |
| NA    | SMAD4   | BBC3     |
| NA    | SMARCA4 | BCL10    |
| NA    | SMARCB1 | BCL2L11  |
| NA    | SMC1A   | BCL2L2   |
| NA    | SMC3    | BTG1     |

|    |          |           |
|----|----------|-----------|
| NA | SMO      | CALR      |
| NA | SNCAIP   | CD276     |
| NA | SOCS1    | CENPA     |
| NA | SOX17    | CRBN      |
| NA | SOX2     | CTLA4     |
| NA | SOX9     | CTNNA1    |
| NA | SPATA2   | CXCR4     |
| NA | SPEN     | CYP17A1   |
| NA | SPOP     | DCUN1D1   |
| NA | SRC      | DIS3      |
| NA | STAG2    | DNAJB1    |
| NA | STAT3    | E2F3      |
| NA | STK11    | EED       |
| NA | SUFU     | EGFL7     |
| NA | SYK      | EIF1AX    |
| NA | TAF1     | EIF4A2    |
| NA | TAS2R38  | ERCC3     |
| NA | TBL1XR1  | ERCC4     |
| NA | TBX3     | ERCC5     |
| NA | TEK      | FAM46C    |
| NA | TET1     | FANCF     |
| NA | TET2     | FANCM     |
| NA | TGFB1    | FAS       |
| NA | TGFBR2   | FGF10     |
| NA | TIPARP   | FGF23     |
| NA | TLR4     | FGF6      |
| NA | TNF      | FGF7      |
| NA | TNFAIP3  | FOXA1     |
| NA | TNFRSF14 | FOXL2     |
| NA | TNFRSF18 | GATA4     |
| NA | TNFRSF4  | GID4      |
| NA | TNFSF11  | GNA13     |
| NA | TNFSF14  | GPS2      |
| NA | TNFSF18  | GREM1     |
| NA | TNFSF4   | H3F3B     |
| NA | TOP1     | H3F3C     |
| NA | TP53     | HIST1H1C  |
| NA | TSC1     | HIST1H2BD |
| NA | TSC2     | HIST1H3A  |
| NA | TSHR     | HIST1H3B  |
| NA | TSHZ2    | HIST1H3C  |
| NA | TSHZ3    | HIST1H3D  |
| NA | TYRO3    | HIST1H3E  |

|    |         |           |
|----|---------|-----------|
| NA | U2AF1   | HIST1H3G  |
| NA | USP9X   | HIST1H3H  |
| NA | VEGFA   | HIST1H3I  |
| NA | VEGFB   | HIST1H3J  |
| NA | VEZF1   | HIST2H3C  |
| NA | VHL     | HIST2H3D  |
| NA | VTCN1   | HIST3H3   |
| NA | WHSC1   | HOXB13    |
| NA | WHSC1L1 | HSD3B1    |
| NA | WT1     | ICOSLG    |
| NA | XPO1    | ID3       |
| NA | XRCC2   | IFNGR1    |
| NA | ZNF217  | IL10      |
| NA | ZNF703  | INHA      |
| NA | NA      | IRS1      |
| NA | NA      | JUN       |
| NA | NA      | KLF4      |
| NA | NA      | KLHL6     |
| NA | NA      | LYN       |
| NA | NA      | LZTR1     |
| NA | NA      | MALT1     |
| NA | NA      | MAP3K14   |
| NA | NA      | MAPK1     |
| NA | NA      | MGA       |
| NA | NA      | MYOD1     |
| NA | NA      | NCOA3     |
| NA | NA      | NEGR1     |
| NA | NA      | NKX3-1    |
| NA | NA      | PARP1     |
| NA | NA      | PDCD1     |
| NA | NA      | PDCD1LG2  |
| NA | NA      | PDK1      |
| NA | NA      | PDPK1     |
| NA | NA      | PHOX2B    |
| NA | NA      | PIK3C2B   |
| NA | NA      | PIK3C3    |
| NA | NA      | PIK3R3    |
| NA | NA      | PLK2      |
| NA | NA      | PMAIP1    |
| NA | NA      | PNRC1     |
| NA | NA      | POM121L12 |
| NA | NA      | PPM1D     |
| NA | NA      | PRKCI     |

|    |    |         |
|----|----|---------|
| NA | NA | PRSS8   |
| NA | NA | RAB35   |
| NA | NA | RAD21   |
| NA | NA | RANBP2  |
| NA | NA | REL     |
| NA | NA | RFWD2   |
| NA | NA | RHEB    |
| NA | NA | RIT1    |
| NA | NA | RPA1    |
| NA | NA | RYBP    |
| NA | NA | SDHAF2  |
| NA | NA | SH2D1A  |
| NA | NA | SHQ1    |
| NA | NA | SOCS1   |
| NA | NA | SOX10   |
| NA | NA | SOX17   |
| NA | NA | SOX2    |
| NA | NA | STAT4   |
| NA | NA | SUZ12   |
| NA | NA | TACC3   |
| NA | NA | TERC    |
| NA | NA | TET1    |
| NA | NA | TGFBR1  |
| NA | NA | TIPARP  |
| NA | NA | TMEM127 |
| NA | NA | TOP2A   |
| NA | NA | VEGFB   |
| NA | NA | VEGFC   |
| NA | NA | VTCN1   |
| NA | NA | WISP3   |
| NA | NA | XIAP    |
| NA | NA | XRCC3   |
| NA | NA | YAP1    |
| NA | NA | ZBTB2   |
| NA | NA | ZRSR2   |

---



Table S2. Clinicopathologic Characteristics by Radiological Subtype (WES Cohort)

| Characteristic        | Total (N=125)        | pGGN (n=48<br>[38%]) | HGGN (n=29<br>[24%]) | PSN (n=48<br>[38%])  | <i>P</i><br>value |
|-----------------------|----------------------|----------------------|----------------------|----------------------|-------------------|
| Age at resection, y   | 60.0 (54.0-<br>65.0) | 58.5 (53.5-<br>64.0) | 60.0 (54.0-<br>66.0) | 61.0 (56.5-<br>68.5) | <b>0.043</b>      |
| Sex                   |                      |                      |                      |                      |                   |
| Male                  | 47 (38)              | 19 (40)              | 11 (38)              | 17 (35)              | 0.914             |
| Female                | 78 (62)              | 29 (60)              | 18 (62)              | 31 (65)              |                   |
| Smoking status        |                      |                      |                      |                      |                   |
| Nonsmoker             | 93 (74)              | 38 (80)              | 20 (69)              | 35 (73)              | 0.583             |
| Smoker                | 32 (26)              | 10 (20)              | 9 (31)               | 13 (27)              |                   |
| Total size on CT, mm  | 15.8 (10.9-<br>24.7) | 10.8 (7.6-13.9)      | 17.4 (13.4-<br>21.9) | 24.8 (15.7-<br>29.4) | <b>&lt;0.001</b>  |
| Procedure type        |                      |                      |                      |                      |                   |
| Wedge resection       | 51 (41)              | 29 (60)              | 8 (28)               | 14 (29)              | <b>0.003</b>      |
| Segmentectomy         | 9 (7)                | 4 (9)                | 3 (10)               | 2 (4)                |                   |
| Lobectomy             | 65 (52)              | 15 (31)              | 18 (62)              | 32 (67)              |                   |
| Pathological subtype  |                      |                      |                      |                      |                   |
| AIS                   | 19 (15)              | 17 (35)              | 1 (4)                | 1 (2)                | <b>&lt;0.001</b>  |
| MIA                   | 25 (20)              | 21 (45)              | 3 (10)               | 1 (2)                |                   |
| IAC                   | 81 (65)              | 10 (20)              | 25 (86)              | 46 (96)              |                   |
| Predominant histology |                      |                      |                      |                      |                   |
| LEP                   | 69 (55)              | 42 (88)              | 15 (52)              | 12 (25)              | <b>&lt;0.001</b>  |
| ACI/PAP               | 56 (45)              | 6 (12)               | 14 (48)              | 36 (75)              |                   |
| Pathological stage    |                      |                      |                      |                      |                   |
| 0                     | 19 (15)              | 17 (35)              | 1 (4)                | 1 (2)                | <b>&lt;0.001</b>  |
| IA                    | 98 (78)              | 31 (65)              | 28 (96)              | 39 (81)              |                   |
| IB                    | 8 (7)                | 0 (0)                | 0 (0)                | 8 (17)               |                   |

51 ACI, acinar; AIS, adenocarcinoma in situ; CT, computed tomography; IAC, invasive adenocarcinoma;  
52 LEP, lepidic; MIA, minimally invasive adenocarcinoma; PAP, papillary; WES, whole exome  
53 sequencing.

54 Table S3. Negative Binomial Regression Analysis on Association with TMB (WES Cohort)

| Variable                                | Univariate analysis |        |          | Multivariate analysis |       |        |          |           |
|-----------------------------------------|---------------------|--------|----------|-----------------------|-------|--------|----------|-----------|
|                                         | IRR                 | 95% CI |          | P value               | IRR   | 95% CI |          | P value   |
| Age at resection, per 1y increased      | 1.020               | 1.003  | to 1.039 | <b>0.025</b>          | 1.013 | 0.994  | to 1.033 | 0.191     |
| Sex                                     |                     |        |          |                       |       |        |          |           |
| Male                                    |                     |        |          | Reference             |       |        |          | Reference |
| Female                                  | 0.747               | 0.538  | to 1.040 | 0.082                 | 0.842 | 0.534  | to 1.350 | 0.467     |
| Smoking                                 |                     |        |          |                       |       |        |          |           |
| No                                      |                     |        |          | Reference             |       |        |          | Reference |
| Yes                                     | 1.418               | 0.994  | to 1.997 | <b>0.049</b>          | 1.216 | 0.756  | to 1.970 | 0.423     |
| Pathological subtype                    |                     |        |          |                       |       |        |          |           |
| AIS                                     |                     |        |          | Reference             |       |        |          | Reference |
| MIA                                     | 1.528               | 0.738  | to 3.375 | 0.268                 | 1.435 | 0.679  | to 3.220 | 0.357     |
| IAC                                     | 2.673               | 1.483  | to 5.408 | <b>0.003</b>          | 1.854 | 0.888  | to 4.165 | 0.114     |
| Predominant histology                   |                     |        |          |                       |       |        |          |           |
| LEP                                     |                     |        |          | Reference             |       |        |          | Reference |
| ACI/PAP                                 | 1.651               | 1.193  | to 2.296 | <b>0.003</b>          | 1.172 | 0.764  | to 1.834 | 0.475     |
| Total size on CT (L), per 1mm increased | 1.027               | 1.012  | to 1.042 | <b>&lt;0.001</b>      | 1.011 | 0.982  | to 1.039 | 0.461     |
| Solid size on CT (L), per 1mm increased | 1.030               | 1.013  | to 1.047 | <b>&lt;0.001</b>      | 0.991 | 0.939  | to 1.043 | 0.723     |
| Solid size on CT (M), per 1mm increased | 1.029               | 1.010  | to 1.047 | <b>0.001</b>          | 1.017 | 0.974  | to 1.066 | 0.478     |

55 ACI, acinar; AIS, adenocarcinoma in situ; CT, computed tomography; IAC, invasive adenocarcinoma;  
56 IRR, incidence rate ratio; L, Lung window; LEP, lepidic; M, Mediastinal (soft-tissue) window; MIA,  
57 minimally invasive adenocarcinoma; PAP, papillary; TMB, tumor mutation burden; WES, whole  
58 exome sequencing.

59

Table S4. Driver Gene Identification by dNdScv Algorithm

| Entire Cohort ( $q < 0.1$ and nonsilent mutations $n \geq 5$ ) |                  |                   |                  |                   |                  |                              |                               |                               |                               |                               |                                 |                                   |                               |                               |                                 |                                   |                                             |                                             |
|----------------------------------------------------------------|------------------|-------------------|------------------|-------------------|------------------|------------------------------|-------------------------------|-------------------------------|-------------------------------|-------------------------------|---------------------------------|-----------------------------------|-------------------------------|-------------------------------|---------------------------------|-----------------------------------|---------------------------------------------|---------------------------------------------|
| gene                                                           | n <sub>syn</sub> | n <sub>miss</sub> | n <sub>non</sub> | n <sub>stop</sub> | n <sub>ind</sub> | w <sub>mi<sub>sc</sub></sub> | wn <sub>on<sub>cv</sub></sub> | ws <sub>pl<sub>cv</sub></sub> | wi <sub>nd<sub>cv</sub></sub> | pm <sub>is<sub>cv</sub></sub> | ptr <sub>unc<sub>cv</sub></sub> | pall <sub>subs<sub>cv</sub></sub> | pin <sub>d<sub>cv</sub></sub> | qm <sub>is<sub>cv</sub></sub> | qtr <sub>unc<sub>cv</sub></sub> | qall <sub>subs<sub>cv</sub></sub> | pgl <sub>oba<sub>l<sub>cv</sub></sub></sub> | qgl <sub>oba<sub>l<sub>cv</sub></sub></sub> |
| EGFR                                                           | 1                | 97                | 0                | 0                 | 3                | 9.3                          | 0                             | 0                             | 2.8                           | 0                             | 0.8                             | 0                                 | 6.4                           | 0                             | 0.9                             | 0                                 | 0                                           | 0                                           |
|                                                                |                  |                   |                  |                   | 2                | 57                           |                               |                               | 48                            |                               | 164                             | 0                                 | 8E-18                         | 0                             | 976                             | 0                                 | 0                                           | 0                                           |
|                                                                |                  |                   |                  |                   |                  | 5                            |                               |                               | 3                             |                               | 05                              |                                   | 18                            |                               | 8                               |                                   |                                             |                                             |
| KRAS                                                           | 0                | 15                | 0                | 0                 | 0                | 34                           | 0                             | 0                             | 0                             | 0                             | 0.9                             | 0                                 | 1                             | 0                             | 0.9                             | 0                                 | 0                                           | 0                                           |
|                                                                |                  |                   |                  |                   |                  | 5.7                          |                               |                               |                               |                               | 857                             |                                   |                               |                               | 976                             |                                   |                                             | 0                                           |
|                                                                |                  |                   |                  |                   |                  | 9                            |                               |                               |                               |                               | 75                              |                                   |                               |                               | 8                               |                                   |                                             | 0                                           |
| RBM10                                                          | 0                | 0                 | 17               | 2                 | 2                | 0                            | 26                            | 26                            | 24                            | 0.9                           |                                 |                                   | 3.8                           | 0.9                           |                                 |                                   |                                             |                                             |
|                                                                |                  |                   |                  |                   | 1                |                              | 72                            | 72                            | 9.9                           | 12                            | 0                               | 0                                 | 6E-14                         | 91                            | 0                               | 0                                 | 0                                           | 0                                           |
|                                                                |                  |                   |                  |                   |                  |                              | 2.2                           | 2.2                           | 80                            | 15                            |                                 |                                   | 14                            | 02                            |                                 |                                   |                                             | 0                                           |
|                                                                |                  |                   |                  |                   |                  |                              | 1                             | 1                             | 7                             | 9                             |                                 |                                   | 8                             | 8                             |                                 |                                   |                                             | 0                                           |
| TP53                                                           | 2                | 22                | 2                | 1                 | 6                | 14.                          | 20.                           | 20.                           | 16                            | 5.7                           | 0.0                             | 1.07                              | 4.3                           | 8.9                           | 0.1                             | 0.00                              | 1.36                                        | <b>2.12</b>                                 |
|                                                                |                  |                   |                  |                   |                  | 05                           | 35                            | 35                            | 8.7                           | 4E-07                         | 018                             | E-06                              | 1E-07                         | 5E-05                         | 965                             | 013                               | E-                                          | <b>E-</b>                                   |
|                                                                |                  |                   |                  |                   |                  | 7                            | 1                             | 1                             | 7                             | 07                            | 86                              |                                   | 07                            | 05                            | 15                              | 4                                 | 11                                          | <b>09</b>                                   |
|                                                                |                  |                   |                  |                   |                  | 97                           |                               |                               | 14.                           | 3.7                           | 0.9                             |                                   | 0.0                           | 7.7                           | 0.9                             |                                   | 1.84                                        | <b>2.30</b>                                 |
| BRAF                                                           | 0                | 13                | 0                | 0                 | 1                | 6.6                          | 0                             | 0                             | 44                            | 3E-08                         | 544                             | 1.62                              | 58                            | 4E-06                         | 976                             | 2.52                              | E-                                          | <b>E-</b>                                   |
|                                                                |                  |                   |                  |                   |                  | 39                           |                               |                               | 91                            | 08                            | 79                              | E-07                              | 56                            | 06                            | 8                               | E-05                              | 07                                          | <b>05</b>                                   |
|                                                                |                  |                   |                  |                   |                  | 3                            |                               |                               | 2                             |                               |                                 |                                   |                               |                               |                                 |                                   |                                             |                                             |
| MAP2K1                                                         | 0                | 0                 | 0                | 1                 | 4                | 0                            | 20                            | 20                            | 11                            | 0.9                           | 0.0                             | 0.01                              | 3.1                           | 0.9                           | 0.3                             | 0.42                              | 7.60                                        | <b>0.00</b>                                 |
|                                                                |                  |                   |                  |                   |                  |                              | 49.                           | 49.                           | 2.5                           | 23                            | 046                             | 566                               | 2E-05                         | 91                            | 160                             | 425                               | E-                                          | <b>078</b>                                  |
|                                                                |                  |                   |                  |                   |                  |                              | 18                            | 18                            | 12                            | 42                            | 76                              | 3                                 | 05                            | 02                            | 6                               | 7                                 | 06                                          | <b>9</b>                                    |
|                                                                |                  |                   |                  |                   |                  |                              | 6                             | 6                             | 4                             | 4                             |                                 |                                   | 8                             | 8                             |                                 |                                   |                                             |                                             |
| MEK12                                                          | 0                | 5                 | 3                | 0                 | 4                | 18                           | 10                            | 10                            | 20.                           | 0.0                           | 0.0                             | 0.00                              | 0.0                           | 0.2                           | 0.0                             | 0.03                              | 3.60                                        | <b>0.00</b>                                 |
|                                                                |                  |                   |                  |                   |                  | 7.0                          | 62.                           | 62.                           | 32                            | 07                            | 001                             | 045                               | 05                            | 54                            | 308                             | 577                               | E-                                          | <b>320</b>                                  |
|                                                                |                  |                   |                  |                   |                  | 87                           | 38                            | 38                            | 55                            | 28                            | 48                              | 9                                 | 66                            | 73                            | 34                              | 3                                 | 05                                          | <b>7</b>                                    |
|                                                                |                  |                   |                  |                   |                  | 7                            | 1                             | 1                             | 5                             | 5                             |                                 |                                   | 7                             | 7                             |                                 |                                   |                                             |                                             |
|                                                                |                  |                   |                  |                   |                  | 0.4                          |                               |                               | 70.                           | 0.4                           |                                 |                                   | 0.9                           | 0.9                           | 0.99                            | 8.93                              |                                             | <b>0.00</b>                                 |
| ERBB2                                                          | 3                | 1                 | 0                | 0                 | 8                | 68                           | 0                             | 0                             | 58                            | 86                            | 511                             | 230                               | 2E-05                         | 91                            | 976                             | 988                               | E-                                          | <b>695</b>                                  |
|                                                                |                  |                   |                  |                   |                  | 03                           |                               |                               | 90                            | 58                            | 21                              | 4                                 | 05                            | 02                            | 8                               | 8                                 | 05                                          |                                             |
|                                                                |                  |                   |                  |                   |                  | 4                            |                               |                               | 2                             | 7                             |                                 |                                   | 8                             | 8                             |                                 |                                   |                                             |                                             |
|                                                                |                  |                   |                  |                   |                  | 15                           |                               |                               | 23.                           | 0.0                           | 0.0                             | 0.01                              | 0.0                           | 0.5                           | 0.3                             | 0.42                              | 0.00                                        | <b>0.05</b>                                 |
| MEK1                                                           | 0                | 1                 | 1                | 0                 | 3                | 1.2                          | 17                            | 17                            | 59                            | 75                            | 056                             | 293                               | 06                            | 74                            | 160                             | 425                               | 083                                         | <b>772</b>                                  |
|                                                                |                  |                   |                  |                   |                  | 61                           | 14.                           | 14.                           | 64                            | 23                            | 76                              | 4                                 | 17                            | 05                            | 6                               | 7                                 | 4                                           | <b>9</b>                                    |
|                                                                |                  |                   |                  |                   |                  | 3                            | 57                            | 57                            | 7                             |                               |                                 |                                   | 9                             | 8                             |                                 |                                   |                                             |                                             |

|     |   |   |   |   |   |     |     |     |     |     |     |      |     |     |     |      |      |             |
|-----|---|---|---|---|---|-----|-----|-----|-----|-----|-----|------|-----|-----|-----|------|------|-------------|
| SET |   |   |   |   |   | 55. | 58  | 58  | 25. |     |     |      | 0.0 | 0.8 |     |      |      |             |
| D2  | 0 | 1 | 1 | 0 | 6 | 85  | 6.8 | 6.8 | 92  | 0.1 | 0.0 | 0.05 | 01  | 03  | 0.4 | 0.67 | 0.00 | <b>0.05</b> |
|     |   |   |   |   |   | 4   | 24  | 24  | 39  | 88  | 181 | 705  | 61  | 24  | 526 | 619  | 094  | <b>908</b>  |
|     |   |   |   |   |   |     | 7   | 7   | 2   | 92  | 64  | 6    | 5   | 3   | 51  |      | 8    |             |
|     |   |   |   |   |   | 20  | 50  | 50  | 15. |     |     |      | 0.0 | 0.2 |     |      |      |             |
| NF1 | 0 | 4 | 1 | 0 | 4 | 7.2 | 7.7 | 7.7 | 60  | 0.0 | 0.0 | 0.01 | 10  | 54  | 0.4 | 0.42 | 0.00 | <b>0.06</b> |
|     |   |   |   |   |   | 80  | 56  | 56  | 91  | 07  | 212 | 110  | 32  | 73  | 774 | 425  | 115  | <b>544</b>  |
|     |   |   |   |   |   | 3   | 1   | 1   | 2   | 36  | 28  | 5    | 9   | 7   | 97  | 7    | 5    | <b>3</b>    |
|     |   |   |   |   |   | 69  | 15  | 15  |     | 0.0 |     |      |     | 0.0 |     |      |      |             |
| U2  | 0 | 4 | 1 | 0 | 0 | 1.3 | 62. | 62. | 0   | 00  | 0.0 | 0.00 | 1   | 20  | 0.3 | 0.01 | 0.00 | <b>0.08</b> |
| AF1 |   |   |   |   |   | 43  | 82  | 82  |     | 16  | 062 | 016  |     | 05  | 160 | 687  | 158  | <b>205</b>  |
|     |   |   |   |   |   | 5   | 4   | 4   |     | 1   | 77  | 3    |     | 9   | 6   | 5    |      | <b>2</b>    |

pGGN Cohort ( $q < 0.1$  and nonsilent mutations  $n \geq 5$ )

| gen | n  | n  | n | n  | n  | w   | wn  | ws  | wi  | pm    | ptr   | pall | pin   | qm    | qtr   | qall | pgl         | qgl         |
|-----|----|----|---|----|----|-----|-----|-----|-----|-------|-------|------|-------|-------|-------|------|-------------|-------------|
| e_n | _s | _  | _ | _s | _i | mi  | on  | pl_ | nd  | is_   | unc   | subs | d_    | is_   | unc   | subs | oba         | oba         |
| ame | n  | is | o | pl | d  | s_c | _cv | cv  | _cv | cv    | _cv   | _cv  | cv    | cv    | _cv   | _cv  | l_cv        | l_cv        |
| EG  |    |    |   |    | 1  | 37  |     |     | 41  |       | 0.9   | 2.22 | 2.1   |       | 0.9   | 1.38 | 0           | <b>0</b>    |
| FR  | 0  | 12 | 0 | 0  | 3  | 1.8 | 0   | 0   | 6.3 | 0     | 327   | E-16 | 5E-29 | 0     | 986   | E-13 |             |             |
|     |    |    |   |    |    | 76  |     |     | 93  |       | 88    |      | 29    |       | 97    |      |             |             |
|     |    |    |   |    |    | 1   |     |     | 6   |       |       |      |       |       |       |      |             |             |
| RB  |    |    |   |    | 6  | 0   | 53  | 53  | 24  | 0.7   | 2.5   | 1.40 | 3.6   | 0.9   | 1.6   | 2.18 | 0           | <b>0</b>    |
| M1  | 0  | 0  | 4 | 0  | 0  | 0   | 3.4 | 3.4 | 9.9 | 24    | 8E-09 | E-08 | 2E-13 | 51    | 1E-06 | E-06 |             |             |
| 0   |    |    |   |    |    |     | 68  | 68  | 80  | 85    | 09    |      | 13    | 32    | 06    |      |             |             |
|     |    |    |   |    |    |     | 1   | 1   | 7   | 2     |       |      | 8     | 06    |       |      |             |             |
| KR  | 0  | 7  | 0 | 0  | 0  | 69  |     |     |     | 2.9   | 0.9   | 2.86 | 1     | 9.3   | 0.9   | 8.92 | 8.55        | <b>1.78</b> |
| AS  |    |    |   |    |    | 0.5 | 0   | 0   | 0   | 9E-14 | 645   | E-13 |       | 0E-12 | 986   | E-11 | E-12        | <b>E-09</b> |
|     |    |    |   |    |    | 13  |     |     |     |       |       |      |       | 12    | 97    |      |             |             |
|     |    |    |   |    |    | 2   |     |     |     |       |       |      |       |       |       |      |             |             |
| BR  | 0  | 12 | 0 | 0  | 1  | 80. |     |     | 50. | 1.7   | 0.8   | 1.07 | 0.0   | 3.5   | 0.9   | 2.23 | 5.38        | <b>8.38</b> |
| AF  |    |    |   |    |    | 50  | 0   | 0   | 57  | 2E-19 | 476   | E-09 | 19    | 7E-08 | 986   | E-07 | E-10        | <b>E-08</b> |
|     |    |    |   |    |    | 48  |     |     | 19  | 10    | 9     |      | 5     | 08    | 97    |      |             |             |
|     |    |    |   |    |    |     |     |     | 3   |       |       |      |       |       |       |      |             |             |
| ER  | 1  | 1  | 0 | 0  | 5  | 2.1 |     |     | 15  | 0.5   | 0.7   | 0.78 | 3.6   | 0.9   | 0.9   | 0.99 | 6.46        | <b>8.04</b> |
| BB2 |    |    |   |    |    | 66  | 0   | 0   | 4.4 | 39    | 584   | 036  | 0E-10 | 51    | 986   | 996  | E-09        | <b>E-07</b> |
|     |    |    |   |    |    | 57  |     |     | 13  | 48    | 87    | 6    | 10    | 32    | 97    | 5    | 09          |             |
|     |    |    |   |    |    | 3   |     |     | 5   | 5     |       |      |       | 8     |       |      |             |             |
| MA  |    |    |   |    | 3  | 29  |     |     | 0.7 | 0.9   | 0.94  | 1.8  | 0.9   | 0.9   | 0.99  | 2.89 | <b>0.00</b> |             |
| P2K | 0  | 0  | 0 | 0  | 0  | 0   | 0   | 0   | 5.3 | 44    | 134   | 254  | 5E-32 | 51    | 986   | 996  | E-06        | <b>030</b>  |
| 1   |    |    |   |    |    |     |     |     | 45  | 13    | 51    | 9    | 07    | 32    | 97    | 5    | 06          | <b>1</b>    |
|     |    |    |   |    |    |     |     |     | 2   | 9     |       |      |       | 8     |       |      |             |             |

HGGN Cohort (q < 0.1 and nonsilent mutations n ≥ 5)

| gene_name | n_s_n | n_m_is | n_n_o_n | n_s_pl | n_i_n_d | w_mi_s_cv            | wn_on_cv             | ws_pl_cv             | wi_nd_cv             | pm_is_cv             | ptr_unc_cv       | pall_subs_cv     | pin_d_cv     | qm_is_cv             | qtr_unc_cv       | qall_subs_cv     | pgl_oba_l_cv | qgl_oba_l_cv                          |
|-----------|-------|--------|---------|--------|---------|----------------------|----------------------|----------------------|----------------------|----------------------|------------------|------------------|--------------|----------------------|------------------|------------------|--------------|---------------------------------------|
| EGFR      | 0     | 18     | 0       | 0      | 9       | 19<br>9.2<br>34<br>2 | 0                    | 0                    | 57<br>6.5<br>45      | 5.6<br>2E-04         | 0.9<br>071       | 3.95<br>E-13     | 1.6<br>2E-22 | 3.5<br>0E-11         | 0.9<br>813<br>59 | 2.46<br>E-10     | 0            | <b>0</b>                              |
| RBM10     | 0     | 0      | 5       | 1      | 2       | 0                    | 90<br>6.9<br>61<br>6 | 90<br>6.9<br>61<br>6 | 16<br>6.6<br>53<br>8 | 0.7<br>05<br>15<br>3 | 2.4<br>1E-12     | 6.70<br>E-12     | 7.1<br>6E-05 | 0.9<br>00<br>05<br>1 | 1.5<br>0E-09     | 2.09<br>E-09     | 1.74<br>E-14 | <b>5.43</b><br><b>E-12</b>            |
| ERBB2     | 1     | 0      | 0       | 0      | 4       | 0                    | 0                    | 0                    | 24<br>7.0<br>61<br>6 | 0.6<br>51<br>81<br>9 | 0.9<br>031<br>42 | 0.89<br>654      | 2.8<br>6E-09 | 0.9<br>00<br>05<br>1 | 0.9<br>813<br>59 | 0.99<br>168<br>1 | 5.33<br>E-08 | <b>1.11</b><br><b>E-05</b>            |
| MAP2K1    | 0     | 0      | 0       | 0      | 3       | 0                    | 0                    | 0                    | 59<br>0.6<br>90<br>4 | 0.8<br>13<br>73<br>5 | 0.9<br>500<br>72 | 0.97<br>072<br>1 | 2.1<br>9E-08 | 0.9<br>00<br>05<br>1 | 0.9<br>813<br>59 | 0.99<br>168<br>1 | 3.97<br>E-07 | <b>6.18</b><br><b>E-05</b>            |
| TP53      | 0     | 2      | 0       | 0      | 2       | 69.<br>33<br>35<br>8 | 0                    | 0                    | 39<br>3.7<br>93<br>6 | 0.0<br>00<br>78      | 0.9<br>473<br>24 | 0.00<br>350<br>4 | 1.2<br>9E-05 | 0.1<br>61<br>89<br>5 | 0.9<br>813<br>59 | 0.54<br>570<br>7 | 8.08<br>E-07 | <b>0.00</b><br><b>010</b><br><b>1</b> |

PSN Cohort (q < 0.1 and nonsilent mutations n ≥ 5)

| gene_name | n_s_n | n_m_is | n_n_o_n | n_s_pl | n_i_n_d | w_mi_s_cv            | wn_on_cv             | ws_pl_cv             | wi_nd_cv             | pm_is_cv             | ptr_unc_cv       | pall_subs_cv | pin_d_cv     | qm_is_cv             | qtr_unc_cv       | qall_subs_cv | pgl_oba_l_cv | qgl_oba_l_cv               |
|-----------|-------|--------|---------|--------|---------|----------------------|----------------------|----------------------|----------------------|----------------------|------------------|--------------|--------------|----------------------|------------------|--------------|--------------|----------------------------|
| EGFR      | 1     | 67     | 0       | 0      | 2       | 24<br>8.5<br>77<br>8 | 0                    | 0                    | 35<br>2.3<br>33<br>1 | 0                    | 0.8<br>279<br>62 | 0            | 5.4<br>0E-16 | 0                    | 0.9<br>947<br>75 | 0            | 0            | <b>0</b>                   |
| RBM10     | 0     | 0      | 8       | 1      | 3       | 0                    | 11<br>50.<br>85<br>7 | 11<br>50.<br>85<br>7 | 27<br>0.8<br>12<br>4 | 0.6<br>97<br>94<br>1 | 0                | 0            | 2.0<br>0E-11 | 0.8<br>94<br>47<br>1 | 0                | 0            | 0            | <b>0</b>                   |
| TP53      | 1     | 17     | 1       | 1      | 4       | 30.<br>57            | 36.<br>75            | 36.<br>75            | 19<br>6.8            | 2.9<br>4E-10         | 0.0<br>026<br>06 | 5.23<br>E-10 | 5.6<br>1E-06 | 6.1<br>2E-08         | 0.4<br>058<br>37 | 8.14<br>E-08 | 1.01<br>E-13 | <b>2.10</b><br><b>E-11</b> |

|     |   |   |   |   |   |     |     |     |     |     |     |      |     |     |      |      |             |             |  |
|-----|---|---|---|---|---|-----|-----|-----|-----|-----|-----|------|-----|-----|------|------|-------------|-------------|--|
|     |   |   |   |   |   | 67  | 93  | 93  | 96  |     |     |      |     |     |      |      |             |             |  |
|     |   |   |   |   |   | 4   | 2   | 2   | 8   |     |     |      |     |     |      |      |             |             |  |
|     |   |   |   |   |   | 38  |     |     |     |     |     |      |     |     |      |      |             |             |  |
| KR  |   |   |   |   |   | 9.8 | 0   | 0   | 0   | 2.9 | 0.9 |      |     | 9.0 | 0.9  |      | 5.65        | <b>8.79</b> |  |
| AS  | 0 | 6 | 0 | 0 | 0 | 02  | 0   | 0   | 0   | 0E- | 519 | 2.44 | 1   | 4E- | 947  | 5.07 | E-          | E-          |  |
|     |   |   |   |   |   | 2   |     |     |     | 11  | 79  | E-10 |     | 09  | 75   | E-08 | 09          | <b>07</b>   |  |
|     |   |   |   |   |   | 13. | 12  | 12  | 35. | 0.0 |     |      | 0.0 | 0.5 |      |      |             |             |  |
| ME  |   |   |   |   |   | 55  | 8.2 | 8.2 | 56  | 13  | 2.1 |      |     | 0.0 | 0.00 | 1.07 | <b>0.00</b> |             |  |
| D12 | 0 | 3 | 3 | 0 | 4 | 80  | 36  | 36  | 96  | 79  | 0E- | 3.80 | 01  | 38  | 065  | 473  | E-          | <b>013</b>  |  |
|     |   |   |   |   |   | 8   | 3   | 3   | 2   | 9   | 05  | E-05 | 59  | 95  | 5    | 5    | 06          | <b>3</b>    |  |

62 Table S5. Driver Gene Frequency Comparison between Radiologic Subtypes (Mutation Frequency >  
 63 0.02 were included)

| Fisher's Exact Test (pGGN vs. HGGN) |                 |                   |                 |                   |                 |               |                |          |           |           |
|-------------------------------------|-----------------|-------------------|-----------------|-------------------|-----------------|---------------|----------------|----------|-----------|-----------|
| Gene Symb ol                        | pGGN_ mut_ nu m | pGGN_n omut_ nu m | HGGN_ mut_ nu m | HGGN_n omut_ nu m | total_ mutfre q | pGGN_ mutfreq | HGGN _mutfr eq | mut_ dif | p_ val ue | q_ v alue |
| EGFR                                | 34              | 43                | 26              | 22                | 0.48            | 0.441558      | 0.541667       | 0.100108 | 0.357568  | 0.697462  |
| RBM10                               | 10              | 67                | 8               | 40                | 0.144           | 0.12987       | 0.166667       | 0.036797 | 0.606702  | 0.728042  |
| TP53                                | 4               | 73                | 4               | 44                | 0.064           | 0.051948      | 0.083333       | 0.031385 | 0.482073  | 0.697462  |
| ERBB2                               | 10              | 67                | 7               | 41                | 0.136           | 0.12987       | 0.145833       | 0.015963 | 0.794801  | 0.867056  |
| KRAS                                | 7               | 70                | 2               | 46                | 0.072           | 0.090909      | 0.041667       | 0.049242 | 0.480372  | 0.697462  |
| BRAF                                | 12              | 65                | 1               | 47                | 0.104           | 0.155844      | 0.020833       | 0.135011 | 0.016313  | 0.195753  |
| MAP2K1                              | 3               | 74                | 4               | 44                | 0.056           | 0.038961      | 0.083333       | 0.044372 | 0.426979  | 0.697462  |
| MED12                               | 0               | 77                | 2               | 46                | 0.016           | 0             | 0.041667       | 0.041667 | 0.145548  | 0.697462  |
| NF1                                 | 3               | 74                | 0               | 48                | 0.024           | 0.038961      | 0              | 0.038961 | 0.284645  | 0.697462  |
| MET                                 | 2               | 75                | 1               | 47                | 0.024           | 0.025974      | 0.020833       | 0.005141 | 1         | 1         |
| SETD2                               | 2               | 75                | 0               | 48                | 0.016           | 0.025974      | 0              | 0.025974 | 0.523097  | 0.697462  |
| U2AF1                               | 3               | 74                | 0               | 48                | 0.024           | 0.038961      | 0              | 0.038961 | 0.284645  | 0.697462  |

Fisher's Exact Test (pGGN vs. PSN)

| Gene Symbol | pGGN_mut_num | pGGN_nomut_num | PSN_mut_num | PSN_no_mut_num | total_mutfreq | pGGN_mutfreq | PSN_mutfreq | mut_dif  | p_value  | q_value         |
|-------------|--------------|----------------|-------------|----------------|---------------|--------------|-------------|----------|----------|-----------------|
| EGFR        | 34           | 43             | 96          | 26             | 0.653266      | 0.441558     | 0.786885    | 0.345327 | 8.37E-07 | <b>1.00E-05</b> |
| RBM10       | 10           | 67             | 22          | 100            | 0.160804      | 0.12987      | 0.180328    | 0.050458 | 0.429518 | 0.57269         |
| TP53        | 4            | 73             | 23          | 99             | 0.135678      | 0.051948     | 0.188525    | 0.136577 | 0.005651 | <b>0.016954</b> |
| ERBB2       | 10           | 67             | 1           | 121            | 0.055276      | 0.12987      | 0.008197    | 0.121673 | 0.000383 | <b>0.001534</b> |
| KRAS        | 7            | 70             | 6           | 116            | 0.065327      | 0.090909     | 0.04918     | 0.041729 | 0.255401 | 0.451031        |
| BRAF        | 12           | 65             | 0           | 122            | 0.060302      | 0.155844     | 0           | 0.155844 | 6.40E-06 | <b>3.84E-05</b> |
| MAP2K1      | 3            | 74             | 1           | 121            | 0.020101      | 0.038961     | 0.008197    | 0.030764 | 0.300688 | 0.451031        |
| MED12       | 0            | 77             | 6           | 116            | 0.030151      | 0            | 0.04918     | 0.04918  | 0.083687 | 0.20085         |
| NF1         | 3            | 74             | 5           | 117            | 0.040201      | 0.038961     | 0.040984    | 0.002023 | 1        | 1               |
| MET         | 2            | 75             | 4           | 118            | 0.030151      | 0.025974     | 0.032787    | 0.006813 | 1        | 1               |
| SETD2       | 2            | 75             | 5           | 117            | 0.035176      | 0.025974     | 0.040984    | 0.01501  | 0.708477 | 0.850172        |
| U2AF1       | 3            | 74             | 1           | 121            | 0.020101      | 0.038961     | 0.008197    | 0.030764 | 0.300688 | 0.451031        |

Fisher's Exact Test (HGGN vs. PSN)

| Gene Symbol | HGGN_mut_num | HGGN_nomut_num | PSN_mut_num | PSN_no_mut_num | total_mutfreq | HGGN_mutfreq | PSN_mutfreq | mut_dif  | p_value  | q_value        |
|-------------|--------------|----------------|-------------|----------------|---------------|--------------|-------------|----------|----------|----------------|
| EGFR        | 26           | 22             | 96          | 26             | 0.717647      | 0.541667     | 0.786885    | 0.245219 | 0.002262 | <b>0.01357</b> |
| RBM10       | 8            | 40             | 22          | 100            | 0.176471      | 0.166667     | 0.180328    | 0.013661 | 1        | 1              |



|            |   |    |    |     |              |              |              |              |              |                                       |
|------------|---|----|----|-----|--------------|--------------|--------------|--------------|--------------|---------------------------------------|
| TP53       | 4 | 44 | 23 | 99  | 0.1588<br>24 | 0.08333<br>3 | 0.18852<br>5 | 0.10519<br>1 | 0.1064<br>51 | 0.31<br>935<br>4                      |
| ERBB<br>2  | 7 | 41 | 1  | 121 | 0.0470<br>59 | 0.14583<br>3 | 0.00819<br>7 | 0.13763<br>7 | 0.0006<br>39 | <b>0.00</b><br><b>767</b><br><b>4</b> |
| KRAS       | 2 | 46 | 6  | 116 | 0.0470<br>59 | 0.04166<br>7 | 0.04918      | 0.00751<br>4 | 1            | 1                                     |
| BRAF       | 1 | 47 | 0  | 122 | 0.0058<br>82 | 0.02083<br>3 | 0            | 0.02083<br>3 | 0.2823<br>53 | 0.55<br>409<br>1                      |
| MAP2<br>K1 | 4 | 44 | 1  | 121 | 0.0294<br>12 | 0.08333<br>3 | 0.00819<br>7 | 0.07513<br>7 | 0.0228<br>25 | <b>0.09</b><br><b>130</b><br><b>1</b> |
| MED1<br>2  | 2 | 46 | 6  | 116 | 0.0470<br>59 | 0.04166<br>7 | 0.04918      | 0.00751<br>4 | 1            | 1                                     |
| NF1        | 0 | 48 | 5  | 117 | 0.0294<br>12 | 0            | 0.04098<br>4 | 0.04098<br>4 | 0.3232<br>2  | 0.55<br>409<br>1                      |
| MET        | 1 | 47 | 4  | 118 | 0.0294<br>12 | 0.02083<br>3 | 0.03278<br>7 | 0.01195<br>4 | 1            | 1                                     |
| SETD<br>2  | 0 | 48 | 5  | 117 | 0.0294<br>12 | 0            | 0.04098<br>4 | 0.04098<br>4 | 0.3232<br>2  | 0.55<br>409<br>1                      |
| U2AF<br>1  | 0 | 48 | 1  | 121 | 0.0058<br>82 | 0            | 0.00819<br>7 | 0.00819<br>7 | 1            | 1                                     |

#### Cochran-Armitage Trend Test

| Gene<br>Symb<br>ol | pGGN_<br>mut_nu<br>m | pGGN_n<br>omut_nu<br>m | HGGN_<br>mut_nu<br>m | HGGN_n<br>omut_nu<br>m | PSN_<br>mut_n<br>um | PSN_no<br>mut_nu<br>m | pGGN_<br>mutfre<br>q | HGGN<br>_mutfr<br>eq | PSN_<br>mutfr<br>eq | p_v<br>alue                           |
|--------------------|----------------------|------------------------|----------------------|------------------------|---------------------|-----------------------|----------------------|----------------------|---------------------|---------------------------------------|
| EGFR               | 34                   | 43                     | 26                   | 22                     | 96                  | 26                    | 0.44155<br>8         | 0.54166<br>7         | 0.7868<br>85        | <b>4.67</b><br><b>E-</b><br><b>07</b> |
| RBM1<br>0          | 10                   | 67                     | 8                    | 40                     | 22                  | 100                   | 0.12987              | 0.16666<br>7         | 0.1803<br>28        | 0.35<br>440<br>6                      |
| TP53               | 4                    | 73                     | 4                    | 44                     | 23                  | 99                    | 0.05194<br>8         | 0.08333<br>3         | 0.1885<br>25        | <b>0.00</b><br><b>352</b><br><b>5</b> |
| ERBB<br>2          | 10                   | 67                     | 7                    | 41                     | 1                   | 121                   | 0.12987              | 0.14583<br>3         | 0.0081<br>97        | <b>0.00</b><br><b>062</b><br><b>6</b> |

|            |    |    |   |    |   |     |              |              |              |                                       |
|------------|----|----|---|----|---|-----|--------------|--------------|--------------|---------------------------------------|
| KRAS       | 7  | 70 | 2 | 46 | 6 | 116 | 0.09090<br>9 | 0.04166<br>7 | 0.0491<br>8  | 0.25<br>784<br>9                      |
| BRAF       | 12 | 65 | 1 | 47 | 0 | 122 | 0.15584<br>4 | 0.02083<br>3 | 0            | <b>3.19</b><br><b>E-</b><br><b>06</b> |
| MAP2<br>K1 | 3  | 74 | 4 | 44 | 1 | 121 | 0.03896<br>1 | 0.08333<br>3 | 0.0081<br>97 | 0.15<br>738<br>7                      |
| MED1<br>2  | 0  | 77 | 2 | 46 | 6 | 116 | 0            | 0.04166<br>7 | 0.0491<br>8  | 0.06<br>322<br>2                      |
| NF1        | 3  | 74 | 0 | 48 | 5 | 117 | 0.03896<br>1 | 0            | 0.0409<br>84 | 0.82<br>442<br>7                      |
| MET        | 2  | 75 | 1 | 47 | 4 | 118 | 0.02597<br>4 | 0.02083<br>3 | 0.0327<br>87 | 0.75<br>188<br>1                      |
| SETD<br>2  | 2  | 75 | 0 | 48 | 5 | 117 | 0.02597<br>4 | 0            | 0.0409<br>84 | 0.45<br>179<br>5                      |
| U2AF<br>1  | 3  | 74 | 0 | 48 | 1 | 121 | 0.03896<br>1 | 0            | 0.0081<br>97 | 0.11<br>756<br>5                      |

---

Table S6. Top 20 Gene Frequency Comparison between Radiologic Subtypes (WES Cohort)

| Fisher's Exact Test (pGGN vs. HGGN) |                      |                        |                      |                        |                   |                      |                      |              |              |              |
|-------------------------------------|----------------------|------------------------|----------------------|------------------------|-------------------|----------------------|----------------------|--------------|--------------|--------------|
| Gene Symbol                         | pGGN_<br>mut_nu<br>m | pGGN_<br>nomut_<br>num | HGGN<br>_mut_n<br>um | HGGN<br>_nomut<br>_num | total_m<br>utfreq | pGGN_<br>mutfre<br>q | HGGN<br>_mutfr<br>eq | mut_di<br>f  | p_value      | q_valu<br>e  |
| EGFR                                | 18                   | 30                     | 15                   | 14                     | 0.42857<br>1      | 0.375                | 0.51724<br>1         | 0.14224<br>1 | 0.24376<br>7 | 0.71599<br>5 |
| RBM10                               | 3                    | 45                     | 7                    | 22                     | 0.12987           | 0.0625               | 0.24137<br>9         | 0.17887<br>9 | 0.03544<br>1 | 0.49952<br>2 |
| TP53                                | 3                    | 45                     | 5                    | 24                     | 0.10389<br>6      | 0.0625               | 0.17241<br>4         | 0.10991<br>4 | 0.14477<br>5 | 0.5791       |
| RYR1                                | 1                    | 47                     | 2                    | 27                     | 0.03896<br>1      | 0.02083<br>3         | 0.06896<br>6         | 0.04813<br>2 | 0.55280<br>9 | 1            |
| STK11                               | 4                    | 44                     | 1                    | 28                     | 0.06493<br>5      | 0.08333<br>3         | 0.03448<br>3         | 0.04885<br>1 | 0.64458<br>7 | 1            |
| BIRC6                               | 3                    | 45                     | 2                    | 27                     | 0.06493<br>5      | 0.0625               | 0.06896<br>6         | 0.00646<br>6 | 1            | 1            |
| MUC4                                | 2                    | 46                     | 1                    | 28                     | 0.03896<br>1      | 0.04166<br>7         | 0.03448<br>3         | 0.00718<br>4 | 1            | 1            |
| CHD2                                | 3                    | 45                     | 0                    | 29                     | 0.03896<br>1      | 0.0625               | 0                    | 0.0625       | 0.28639<br>8 | 0.71599<br>5 |
| KRAS                                | 2                    | 46                     | 2                    | 27                     | 0.05194<br>8      | 0.04166<br>7         | 0.06896<br>6         | 0.02729<br>9 | 0.62935<br>5 | 1            |
| ARID1<br>B                          | 0                    | 48                     | 2                    | 27                     | 0.02597<br>4      | 0                    | 0.06896<br>6         | 0.06896<br>6 | 0.13875<br>6 | 0.5791       |
| CCDC1<br>68                         | 3                    | 45                     | 1                    | 28                     | 0.05194<br>8      | 0.0625               | 0.03448<br>3         | 0.02801<br>7 | 1            | 1            |
| CPXM2                               | 1                    | 47                     | 1                    | 28                     | 0.02597<br>4      | 0.02083<br>3         | 0.03448<br>3         | 0.01364<br>9 | 1            | 1            |
| FLG                                 | 3                    | 45                     | 0                    | 29                     | 0.03896<br>1      | 0.0625               | 0                    | 0.0625       | 0.28639<br>8 | 0.71599<br>5 |
| FRG1                                | 1                    | 47                     | 0                    | 29                     | 0.01298<br>7      | 0.02083<br>3         | 0                    | 0.02083<br>3 | 1            | 1            |
| HMCN<br>1                           | 0                    | 48                     | 0                    | 29                     | 0                 | 0                    | 0                    | 0            | 1            | 1            |
| MUC16                               | 1                    | 47                     | 1                    | 28                     | 0.02597<br>4      | 0.02083<br>3         | 0.03448<br>3         | 0.01364<br>9 | 1            | 1            |
| PPP2R5<br>A                         | 0                    | 48                     | 3                    | 26                     | 0.03896<br>1      | 0                    | 0.10344<br>8         | 0.10344<br>8 | 0.04995<br>2 | 0.49952<br>2 |
| RIMS2                               | 0                    | 48                     | 2                    | 27                     | 0.02597<br>4      | 0                    | 0.06896<br>6         | 0.06896<br>6 | 0.13875<br>6 | 0.5791       |
| RSPO1                               | 1                    | 47                     | 1                    | 28                     | 0.02597<br>4      | 0.02083<br>3         | 0.03448<br>3         | 0.01364<br>9 | 1            | 1            |

|     |   |    |   |    |              |              |              |              |              |   |
|-----|---|----|---|----|--------------|--------------|--------------|--------------|--------------|---|
| TTN | 1 | 47 | 2 | 27 | 0.03896<br>1 | 0.02083<br>3 | 0.06896<br>6 | 0.04813<br>2 | 0.55280<br>9 | 1 |
|-----|---|----|---|----|--------------|--------------|--------------|--------------|--------------|---|

Fisher's Exact Test (pGGN vs. PSN)

| Gene Symbol | pGGN_mut_num | pGGN_nomut_num | PSN_mut_num | PSN_nomut_num | total_mutfreq | pGGN_mutfreq | PSN_mutfreq  | mut_diff     | p_value      | q_value                    |
|-------------|--------------|----------------|-------------|---------------|---------------|--------------|--------------|--------------|--------------|----------------------------|
| EGFR        | 18           | 30             | 34          | 14            | 0.54166<br>7  | 0.375        | 0.70833<br>3 | 0.33333<br>3 | 0.00195<br>9 | <b>0.03917</b><br><b>6</b> |
| RBM10       | 3            | 45             | 13          | 35            | 0.16666<br>7  | 0.0625       | 0.27083<br>3 | 0.20833<br>3 | 0.01188<br>6 | 0.11885<br>7               |
| TP53        | 3            | 45             | 11          | 37            | 0.14583<br>3  | 0.0625       | 0.22916<br>7 | 0.16666<br>7 | 0.04004<br>5 | 0.26696<br>9               |
| RYR1        | 1            | 47             | 5           | 43            | 0.0625        | 0.02083<br>3 | 0.10416<br>7 | 0.08333<br>3 | 0.20379<br>1 | 0.69172<br>9               |
| STK11       | 4            | 44             | 3           | 45            | 0.07291<br>7  | 0.08333<br>3 | 0.0625       | 0.02083<br>3 | 1            | 1                          |
| BIRC6       | 3            | 45             | 2           | 46            | 0.05208<br>3  | 0.0625       | 0.04166<br>7 | 0.02083<br>3 | 1            | 1                          |
| MUC4        | 2            | 46             | 4           | 44            | 0.0625        | 0.04166<br>7 | 0.08333<br>3 | 0.04166<br>7 | 0.67730<br>7 | 0.96758<br>2               |
| CHD2        | 3            | 45             | 3           | 45            | 0.0625        | 0.0625       | 0.0625       | 0            | 1            | 1                          |
| KRAS        | 2            | 46             | 2           | 46            | 0.04166<br>7  | 0.04166<br>7 | 0.04166<br>7 | 0            | 1            | 1                          |
| ARID1B      | 0            | 48             | 3           | 45            | 0.03125       | 0            | 0.0625       | 0.0625       | 0.24210<br>5 | 0.69172<br>9               |
| CCDC168     | 3            | 45             | 1           | 47            | 0.04166<br>7  | 0.0625       | 0.02083<br>3 | 0.04166<br>7 | 0.61697<br>8 | 0.94919<br>7               |
| CPXM2       | 1            | 47             | 3           | 45            | 0.04166<br>7  | 0.02083<br>3 | 0.0625       | 0.04166<br>7 | 0.61697<br>8 | 0.94919<br>7               |
| FLG         | 3            | 45             | 2           | 46            | 0.05208<br>3  | 0.0625       | 0.04166<br>7 | 0.02083<br>3 | 1            | 1                          |
| FRG1        | 1            | 47             | 4           | 44            | 0.05208<br>3  | 0.02083<br>3 | 0.08333<br>3 | 0.0625       | 0.36163      | 0.90407<br>5               |
| HMCN1       | 0            | 48             | 5           | 43            | 0.05208<br>3  | 0            | 0.10416<br>7 | 0.10416<br>7 | 0.05602<br>7 | 0.28013<br>6               |
| MUC16       | 1            | 47             | 3           | 45            | 0.04166<br>7  | 0.02083<br>3 | 0.0625       | 0.04166<br>7 | 0.61697<br>8 | 0.94919<br>7               |
| PPP2R5A     | 0            | 48             | 2           | 46            | 0.02083<br>3  | 0            | 0.04166<br>7 | 0.04166<br>7 | 0.49473<br>7 | 0.94919<br>7               |
| RIMS2       | 0            | 48             | 3           | 45            | 0.03125       | 0            | 0.0625       | 0.0625       | 0.24210<br>5 | 0.69172<br>9               |
| RSPO1       | 1            | 47             | 3           | 45            | 0.04166<br>7  | 0.02083<br>3 | 0.0625       | 0.04166<br>7 | 0.61697<br>8 | 0.94919<br>7               |

|     |   |    |   |    |         |              |              |              |   |   |
|-----|---|----|---|----|---------|--------------|--------------|--------------|---|---|
| TTN | 1 | 47 | 2 | 46 | 0.03125 | 0.02083<br>3 | 0.04166<br>7 | 0.02083<br>3 | 1 | 1 |
|-----|---|----|---|----|---------|--------------|--------------|--------------|---|---|

**Fisher's Exact Test (HGGN vs. PSN)**

| Gene Symbol | HGGN<br>_mut_n<br>um | HGGN<br>_nomut<br>_num | PSN_m<br>ut_num | PSN_n<br>omut_n<br>um | total_m<br>utfreq | HGGN<br>_mutfr<br>eq | PSN_m<br>utfreq | mut_di<br>f  | p_value      | q_valu<br>e |
|-------------|----------------------|------------------------|-----------------|-----------------------|-------------------|----------------------|-----------------|--------------|--------------|-------------|
| EGFR        | 15                   | 14                     | 34              | 14                    | 0.63636<br>4      | 0.51724<br>1         | 0.70833<br>3    | 0.19109<br>2 | 0.14171<br>5 | 1           |
| RBM10       | 7                    | 22                     | 13              | 35                    | 0.25974           | 0.24137<br>9         | 0.27083<br>3    | 0.02945<br>4 | 1            | 1           |
| TP53        | 5                    | 24                     | 11              | 37                    | 0.20779<br>2      | 0.17241<br>4         | 0.22916<br>7    | 0.05675<br>3 | 0.77272<br>8 | 1           |
| RYR1        | 2                    | 27                     | 5               | 43                    | 0.09090<br>9      | 0.06896<br>6         | 0.10416<br>7    | 0.03520<br>1 | 0.70434<br>4 | 1           |
| STK11       | 1                    | 28                     | 3               | 45                    | 0.05194<br>8      | 0.03448<br>3         | 0.0625          | 0.02801<br>7 | 1            | 1           |
| BIRC6       | 2                    | 27                     | 2               | 46                    | 0.05194<br>8      | 0.06896<br>6         | 0.04166<br>7    | 0.02729<br>9 | 0.62935<br>5 | 1           |
| MUC4        | 1                    | 28                     | 4               | 44                    | 0.06493<br>5      | 0.03448<br>3         | 0.08333<br>3    | 0.04885<br>1 | 0.64458<br>7 | 1           |
| CHD2        | 0                    | 29                     | 3               | 45                    | 0.03896<br>1      | 0                    | 0.0625          | 0.0625       | 0.28639<br>8 | 1           |
| KRAS        | 2                    | 27                     | 2               | 46                    | 0.05194<br>8      | 0.06896<br>6         | 0.04166<br>7    | 0.02729<br>9 | 0.62935<br>5 | 1           |
| ARID1<br>B  | 2                    | 27                     | 3               | 45                    | 0.06493<br>5      | 0.06896<br>6         | 0.0625          | 0.00646<br>6 | 1            | 1           |
| CCDC1<br>68 | 1                    | 28                     | 1               | 47                    | 0.02597<br>4      | 0.03448<br>3         | 0.02083<br>3    | 0.01364<br>9 | 1            | 1           |
| CPXM2       | 1                    | 28                     | 3               | 45                    | 0.05194<br>8      | 0.03448<br>3         | 0.0625          | 0.02801<br>7 | 1            | 1           |
| FLG         | 0                    | 29                     | 2               | 46                    | 0.02597<br>4      | 0                    | 0.04166<br>7    | 0.04166<br>7 | 0.52426<br>5 | 1           |
| FRG1        | 0                    | 29                     | 4               | 44                    | 0.05194<br>8      | 0                    | 0.08333<br>3    | 0.08333<br>3 | 0.29094<br>1 | 1           |
| HMCN<br>1   | 0                    | 29                     | 5               | 43                    | 0.06493<br>5      | 0                    | 0.10416<br>7    | 0.10416<br>7 | 0.15037<br>6 | 1           |
| MUC16       | 1                    | 28                     | 3               | 45                    | 0.05194<br>8      | 0.03448<br>3         | 0.0625          | 0.02801<br>7 | 1            | 1           |
| PPP2R5<br>A | 3                    | 26                     | 2               | 46                    | 0.06493<br>5      | 0.10344<br>8         | 0.04166<br>7    | 0.06178<br>2 | 0.35898<br>8 | 1           |

|       |   |    |   |    |              |              |              |              |              |   |
|-------|---|----|---|----|--------------|--------------|--------------|--------------|--------------|---|
| RIMS2 | 2 | 27 | 3 | 45 | 0.06493<br>5 | 0.06896<br>6 | 0.0625       | 0.00646<br>6 | 1            | 1 |
| RSPO1 | 1 | 28 | 3 | 45 | 0.05194<br>8 | 0.03448<br>3 | 0.0625       | 0.02801<br>7 | 1            | 1 |
| TTN   | 2 | 27 | 2 | 46 | 0.05194<br>8 | 0.06896<br>6 | 0.04166<br>7 | 0.02729<br>9 | 0.62935<br>5 | 1 |

**Cochran-Armitage Trend Test**

| Gene Symbol | pGGN_mut_num | pGGN_nomut_num | HGGN_mut_num | HGGN_nomut_num | PSN_mut_num | PSN_nomut_num | pGGN_mutfreq | HGGN_mutfreq | PSN_mutfreq  | p_value                    |
|-------------|--------------|----------------|--------------|----------------|-------------|---------------|--------------|--------------|--------------|----------------------------|
| EGFR        | 18           | 30             | 15           | 14             | 34          | 14            | 0.375        | 0.51724<br>1 | 0.70833<br>3 | <b>0.00105</b><br><b>9</b> |
| RBM10       | 3            | 45             | 7            | 22             | 13          | 35            | 0.0625       | 0.24137<br>9 | 0.27083<br>3 | <b>0.00843</b><br><b>9</b> |
| TP53        | 3            | 45             | 5            | 24             | 11          | 37            | 0.0625       | 0.17241<br>4 | 0.22916<br>7 | <b>0.02295</b><br><b>2</b> |
| RYR1        | 1            | 47             | 2            | 27             | 5           | 43            | 0.02083<br>3 | 0.06896<br>6 | 0.10416<br>7 | 0.09531<br>5               |
| STK11       | 4            | 44             | 1            | 28             | 3           | 45            | 0.08333<br>3 | 0.03448<br>3 | 0.0625       | 0.67667<br>8               |
| BIRC6       | 3            | 45             | 2            | 27             | 2           | 46            | 0.0625       | 0.06896<br>6 | 0.04166<br>7 | 0.65711<br>5               |
| MUC4        | 2            | 46             | 1            | 28             | 4           | 44            | 0.04166<br>7 | 0.03448<br>3 | 0.08333<br>3 | 0.37464<br>9               |
| CHD2        | 3            | 45             | 0            | 29             | 3           | 45            | 0.0625       | 0            | 0.0625       | 1                          |
| KRAS        | 2            | 46             | 2            | 27             | 2           | 46            | 0.04166<br>7 | 0.06896<br>6 | 0.04166<br>7 | 1                          |
| ARID1B      | 0            | 48             | 2            | 27             | 3           | 45            | 0            | 0.06896<br>6 | 0.0625       | 0.11817                    |
| CCDC168     | 3            | 45             | 1            | 28             | 1           | 47            | 0.0625       | 0.03448<br>3 | 0.02083<br>3 | 0.29756<br>6               |
| CPXM2       | 1            | 47             | 1            | 28             | 3           | 45            | 0.02083<br>3 | 0.03448<br>3 | 0.0625       | 0.29756<br>6               |
| FLG         | 3            | 45             | 0            | 29             | 2           | 46            | 0.0625       | 0            | 0.04166<br>7 | 0.60248<br>3               |
| FRG1        | 1            | 47             | 0            | 29             | 4           | 44            | 0.02083<br>3 | 0            | 0.08333<br>3 | 0.11817                    |
| HMCN1       | 0            | 48             | 0            | 29             | 5           | 43            | 0            | 0            | 0.10416<br>7 | <b>0.00921</b>             |
| MUC16       | 1            | 47             | 1            | 28             | 3           | 45            | 0.02083<br>3 | 0.03448<br>3 | 0.0625       | 0.29756<br>6               |
| PPP2R5A     | 0            | 48             | 3            | 26             | 2           | 46            | 0            | 0.10344<br>8 | 0.04166<br>7 | 0.29756<br>6               |

|       |   |    |   |    |   |    |              |              |              |              |
|-------|---|----|---|----|---|----|--------------|--------------|--------------|--------------|
| RIMS2 | 0 | 48 | 2 | 27 | 3 | 45 | 0            | 0.06896<br>6 | 0.0625       | 0.11817      |
| RSPO1 | 1 | 47 | 1 | 28 | 3 | 45 | 0.02083<br>3 | 0.03448<br>3 | 0.0625       | 0.29756<br>6 |
| TTN   | 1 | 47 | 2 | 27 | 2 | 46 | 0.02083<br>3 | 0.06896<br>6 | 0.04166<br>7 | 0.60248<br>3 |

---

Table S7. Driver Gene Frequency Comparison between Radiologic Subtypes (IAC)

| Fisher's Exact Test (pGGN vs. HGGN) |                 |                    |                 |                    |                 |                |                |                |                |           |
|-------------------------------------|-----------------|--------------------|-----------------|--------------------|-----------------|----------------|----------------|----------------|----------------|-----------|
| Gene Symb ol                        | pGGN_ mut_ nu m | pGGN_ n omut_ nu m | HGGN_ mut_ nu m | HGGN_ n omut_ nu m | total_ mutfre q | pGGN_ mutfreq  | HGGN_ mutfr eq | mut_ di f      | p_ val ue      | q_ va lue |
| EGFR                                | 21              | 10                 | 21              | 10                 | 0.6774<br>1935  | 0.67741<br>935 | 0.67741<br>935 | 0              | 1              | 1         |
| RBM 10                              | 6               | 25                 | 6               | 25                 | 0.1935<br>4839  | 0.19354<br>839 | 0.19354<br>839 | 0              | 1              | 1         |
| TP53                                | 2               | 29                 | 4               | 27                 | 0.0967<br>7419  | 0.06451<br>613 | 0.12903<br>226 | 0.06451<br>613 | 0.6713<br>2683 | 1         |
| ERBB 2                              | 1               | 30                 | 2               | 29                 | 0.0483<br>871   | 0.03225<br>806 | 0.06451<br>613 | 0.03225<br>806 | 1              | 1         |
| KRAS                                | 6               | 25                 | 2               | 29                 | 0.1290<br>3226  | 0.19354<br>839 | 0.06451<br>613 | 0.12903<br>226 | 0.2554<br>0587 | 1         |
| BRAF                                | 1               | 30                 | 1               | 30                 | 0.0322<br>5806  | 0.03225<br>806 | 0.03225<br>806 | 0              | 1              | 1         |
| MAP2 K1                             | 1               | 30                 | 1               | 30                 | 0.0322<br>5806  | 0.03225<br>806 | 0.03225<br>806 | 0              | 1              | 1         |
| MED 12                              | 0               | 31                 | 1               | 30                 | 0.0161<br>2903  | 0<br>0         | 0.03225<br>806 | 0.03225<br>806 | 1              | 1         |
| NF1                                 | 1               | 30                 | 0               | 31                 | 0.0161<br>2903  | 0.03225<br>806 | 0              | 0.03225<br>806 | 1              | 1         |
| MET                                 | 0               | 31                 | 0               | 31                 | 0<br>0          | 0<br>0         | 0<br>0         | 0<br>0         | 1              | 1         |
| SETD 2                              | 1               | 30                 | 0               | 31                 | 0.0161<br>2903  | 0.03225<br>806 | 0              | 0.03225<br>806 | 1              | 1         |
| U2AF 1                              | 3               | 28                 | 0               | 31                 | 0.0483<br>871   | 0.09677<br>419 | 0              | 0.09677<br>419 | 0.2377<br>0492 | 1         |

| Fisher's Exact Test (pGGN vs. PSN) |                 |                    |                |                  |                 |                |                |                |                |                    |
|------------------------------------|-----------------|--------------------|----------------|------------------|-----------------|----------------|----------------|----------------|----------------|--------------------|
| Gene Symb ol                       | pGGN_ mut_ nu m | pGGN_ n omut_ nu m | PSN_ m ut_ num | PSN_ no mut_ num | total_ mutfre q | pGGN_ mutfreq  | PSN_ m utfreq  | mut_ di f      | p_ val ue      | q_ va lue          |
| EGFR                               | 21              | 10                 | 94             | 21               | 0.7876<br>7123  | 0.67741<br>935 | 0.81739<br>13  | 0.13997<br>195 | 0.1351<br>5397 | 0.405<br>4619<br>1 |
| RBM 10                             | 6               | 25                 | 20             | 95               | 0.1780<br>8219  | 0.19354<br>839 | 0.17391<br>304 | 0.01963<br>534 | 0.7945<br>9189 | 1                  |
| TP53                               | 2               | 29                 | 23             | 92               | 0.1712<br>3288  | 0.06451<br>613 | 0.2            | 0.13548<br>387 | 0.1058<br>5    | 0.405<br>4619<br>1 |
| ERBB 2                             | 1               | 30                 | 1              | 114              | 0.0136<br>9863  | 0.03225<br>806 | 0.00869<br>565 | 0.02356<br>241 | 0.3807<br>2744 | 0.652<br>6756<br>2 |



|            |   |    |   |     |                |                |                |                |                              |                    |
|------------|---|----|---|-----|----------------|----------------|----------------|----------------|------------------------------|--------------------|
| KRAS       | 6 | 25 | 6 | 109 | 0.0821<br>9178 | 0.19354<br>839 | 0.05217<br>391 | 0.14137<br>447 | <b>0.0205</b><br><b>9624</b> | 0.181<br>1476<br>2 |
| BRAF       | 1 | 30 | 0 | 115 | 0.0068<br>4932 | 0.03225<br>806 | 0              | 0.03225<br>806 | 0.2123<br>2877               | 0.509<br>5890<br>4 |
| MAP2<br>K1 | 1 | 30 | 1 | 114 | 0.0136<br>9863 | 0.03225<br>806 | 0.00869<br>565 | 0.02356<br>241 | 0.3807<br>2744               | 0.652<br>6756<br>2 |
| MED<br>12  | 0 | 31 | 4 | 111 | 0.0273<br>9726 | 0              | 0.03478<br>261 | 0.03478<br>261 | 0.5786<br>1077               | 0.867<br>9161<br>5 |
| NF1        | 1 | 30 | 5 | 110 | 0.0410<br>9589 | 0.03225<br>806 | 0.04347<br>826 | 0.01122<br>02  | 1                            | 1                  |
| MET        | 0 | 31 | 3 | 112 | 0.0205<br>4795 | 0              | 0.02608<br>696 | 0.02608<br>696 | 1                            | 1                  |
| SETD<br>2  | 1 | 30 | 5 | 110 | 0.0410<br>9589 | 0.03225<br>806 | 0.04347<br>826 | 0.01122<br>02  | 1                            | 1                  |
| U2AF<br>1  | 3 | 28 | 1 | 114 | 0.0273<br>9726 | 0.09677<br>419 | 0.00869<br>565 | 0.08807<br>854 | <b>0.0301</b><br><b>9127</b> | 0.181<br>1476<br>2 |

#### Fisher's Exact Test (HGGN vs. PSN)

| Gene<br>Symbol | HGGN_<br>mut_num | HGGN_n<br>omut_num | PSN_m<br>ut_num | PSN_no<br>mut_num | total_<br>mutfreq<br>q | HGGN_<br>mutfreq | PSN_m<br>utfreq | mut_di<br>f    | p_val<br>ue    | q_va<br>lue        |
|----------------|------------------|--------------------|-----------------|-------------------|------------------------|------------------|-----------------|----------------|----------------|--------------------|
| EGFR           | 21               | 10                 | 94              | 21                | 0.7876<br>7123         | 0.67741<br>935   | 0.81739<br>13   | 0.13997<br>195 | 0.1351<br>5397 | 0.810<br>9238<br>1 |
| RBM<br>10      | 6                | 25                 | 20              | 95                | 0.1780<br>8219         | 0.19354<br>839   | 0.17391<br>304  | 0.01963<br>534 | 0.7945<br>9189 | 1                  |
| TP53           | 4                | 27                 | 23              | 92                | 0.1849<br>3151         | 0.12903<br>226   | 0.2             | 0.07096<br>774 | 0.4441<br>45   | 1                  |
| ERBB<br>2      | 2                | 29                 | 1               | 114               | 0.0205<br>4795         | 0.06451<br>613   | 0.00869<br>565  | 0.05582<br>048 | 0.1140<br>9621 | 0.810<br>9238<br>1 |
| KRAS           | 2                | 29                 | 6               | 109               | 0.0547<br>9452         | 0.06451<br>613   | 0.05217<br>391  | 0.01234<br>222 | 0.6775<br>79   | 1                  |
| BRAF           | 1                | 30                 | 0               | 115               | 0.0068<br>4932         | 0.03225<br>806   | 0               | 0.03225<br>806 | 0.2123<br>2877 | 0.849<br>3150<br>7 |
| MAP2<br>K1     | 1                | 30                 | 1               | 114               | 0.0136<br>9863         | 0.03225<br>806   | 0.00869<br>565  | 0.02356<br>241 | 0.3807<br>2744 | 1                  |

|           |   |    |   |     |                |                |                |                |                |   |
|-----------|---|----|---|-----|----------------|----------------|----------------|----------------|----------------|---|
| MED<br>12 | 1 | 30 | 4 | 111 | 0.0342<br>4658 | 0.03225<br>806 | 0.03478<br>261 | 0.00252<br>454 | 1              | 1 |
| NF1       | 0 | 31 | 5 | 110 | 0.0342<br>4658 | 0              | 0.04347<br>826 | 0.04347<br>826 | 0.5845<br>4583 | 1 |
| MET       | 0 | 31 | 3 | 112 | 0.0205<br>4795 | 0              | 0.02608<br>696 | 0.02608<br>696 | 1              | 1 |
| SETD<br>2 | 0 | 31 | 5 | 110 | 0.0342<br>4658 | 0              | 0.04347<br>826 | 0.04347<br>826 | 0.5845<br>4583 | 1 |
| U2AF<br>1 | 0 | 31 | 1 | 114 | 0.0068<br>4932 | 0              | 0.00869<br>565 | 0.00869<br>565 | 1              | 1 |

### Cochran-Armitage Trend Test

| Gene<br>Symb<br>ol | pGGN_<br>mut_nu<br>m | pGGN_n<br>omut_nu<br>m | HGGN_<br>mut_nu<br>m | HGGN_n<br>omut_nu<br>m | PSN_<br>mut_n<br>um | PSN_no<br>mut_nu<br>m | pGGN_<br>mutfre<br>q | HGGN<br>_mutfr<br>eq | PSN_<br>mutfr<br>eq | p_va<br>lue                             |
|--------------------|----------------------|------------------------|----------------------|------------------------|---------------------|-----------------------|----------------------|----------------------|---------------------|-----------------------------------------|
| EGFR               | 21                   | 10                     | 21                   | 10                     | 94                  | 21                    | 0.67741<br>935       | 0.67741<br>935       | 0.8173<br>913       | 0.051<br>6617<br>1                      |
| RBM<br>10          | 6                    | 25                     | 6                    | 25                     | 20                  | 95                    | 0.19354<br>839       | 0.19354<br>839       | 0.1739<br>1304      | 0.764<br>7516                           |
| TP53               | 2                    | 29                     | 4                    | 27                     | 23                  | 92                    | 0.06451<br>613       | 0.12903<br>226       | 0.2                 | 0.057<br>7003<br>8                      |
| ERBB<br>2          | 1                    | 30                     | 2                    | 29                     | 1                   | 114                   | 0.03225<br>806       | 0.06451<br>613       | 0.0086<br>9565      | 0.215<br>0450<br>8                      |
| KRAS               | 6                    | 25                     | 2                    | 29                     | 6                   | 109                   | 0.19354<br>839       | 0.06451<br>613       | 0.0521<br>7391      | <b>0.016</b><br><b>8683</b><br><b>1</b> |
| BRAF               | 1                    | 30                     | 1                    | 30                     | 0                   | 115                   | 0.03225<br>806       | 0.03225<br>806       | 0                   | 0.073<br>4529<br>1                      |
| MAP2<br>K1         | 1                    | 30                     | 1                    | 30                     | 1                   | 114                   | 0.03225<br>806       | 0.03225<br>806       | 0.0086<br>9565      | 0.284<br>3409<br>8                      |
| MED<br>12          | 0                    | 31                     | 1                    | 30                     | 4                   | 111                   | 0                    | 0.03225<br>806       | 0.0347<br>8261      | 0.340<br>4568<br>3                      |
| NF1                | 1                    | 30                     | 0                    | 31                     | 5                   | 110                   | 0.03225<br>806       | 0                    | 0.0434<br>7826      | 0.536<br>4463<br>6                      |
| MET                | 0                    | 31                     | 0                    | 31                     | 3                   | 112                   | 0                    | 0                    | 0.0260<br>8696      | 0.235<br>8879<br>1                      |

|      |   |    |   |    |   |     |         |   |        |              |
|------|---|----|---|----|---|-----|---------|---|--------|--------------|
| SETD |   |    |   |    |   |     |         |   |        |              |
| 2    | 1 | 30 | 0 | 31 | 5 | 110 | 0.03225 | 0 | 0.0434 | 0.536        |
|      |   |    |   |    |   |     | 806     |   | 7826   | 4463         |
|      |   |    |   |    |   |     |         |   |        | 6            |
| U2AF |   |    |   |    |   |     |         |   |        | <b>0.010</b> |
| 1    | 3 | 28 | 0 | 31 | 1 | 114 | 0.09677 | 0 | 0.0086 | <b>8952</b>  |
|      |   |    |   |    |   |     | 419     |   | 9565   | <b>2</b>     |

---

Table S8. Co-occurrence and Mutual Exclusivity of Driver Gene in the Entire Cohort

| gene1  | gene2 | pValue   | oddsRatio | 0  | 1 | 1  | 10 | Event              | pair         | event_ratio |
|--------|-------|----------|-----------|----|---|----|----|--------------------|--------------|-------------|
| KRAS   | EGFR  | 1.42E-07 | 0         | 76 | 0 | 15 | 15 | Mutually_Exclusive | EGFR, KRAS   | 0/171       |
| EGFR   | BRAF  | 1.29E-06 | 0         | 78 | 0 | 13 | 15 | Mutually_Exclusive | BRAF, EGFR   | 0/169       |
| ERBB2  | EGFR  | 3.44E-06 | 0.061524  | 75 | 2 | 15 | 16 | Mutually_Exclusive | EGFR, ERBB2  | 2/170       |
| MET    | EGFR  | 0.000792 | 0         | 84 | 0 | 15 | 7  | Mutually_Exclusive | EGFR, MET    | 0/163       |
| MAP2K1 | EGFR  | 0.004398 | 0.078145  | 84 | 1 | 15 | 7  | Mutually_Exclusive | EGFR, MAP2K1 | 1/162       |
| RBM10  | EGFR  | 0.00668  | 3.205901  | 84 | 3 | 12 | 7  | Co_Occurence       | EGFR, RBM10  | 33/130      |
| NF1    | KRAS  | 0.078037 | 5.713022  | 22 | 2 | 13 | 6  | Co_Occurence       | KRAS, NF1    | 2/19        |
| EGFR   | TP53  | 0.110057 | 2.17553   | 84 | 2 | 7  | 13 | Co_Occurence       | EGFR, TP53   | 24/139      |
| NF1    | RBM10 | 0.122839 | 3.253973  | 20 | 3 | 37 | 5  | Co_Occurence       | NF1, RBM10   | 3/42        |
| EGFR   | MED12 | 0.148543 | 0.338828  | 86 | 3 | 5  | 15 | Mutually_Exclusive | EGFR, MED12  | 3/158       |
| EGFR   | NF1   | 0.148543 | 0.338828  | 86 | 3 | 5  | 15 | Mutually_Exclusive | EGFR, NF1    | 3/158       |
| MET    | MED12 | 0.20814  | 5.465339  | 23 | 1 | 7  | 6  | Co_Occurence       | MED12, MET   | 1/13        |
| MET    | NF1   | 0.20814  | 5.465339  | 23 | 1 | 7  | 6  | Co_Occurence       | MET, NF1     | 1/13        |
| SETD2  | NF1   | 0.20814  | 5.465339  | 23 | 1 | 7  | 6  | Co_Occurence       | NF1, SETD2   | 1/13        |
| SETD2  | TP53  | 0.214574 | 2.892558  | 21 | 2 | 29 | 5  | Co_Occurence       | SETD2, TP53  | 2/34        |
| SETD2  | EGFR  | 0.26593  | 3.585399  | 90 | 6 | 15 | 1  | Co_Occurence       | EGFR, SETD2  | 6/151       |
| SETD2  | RBM10 | 0.316738 | 2.118239  | 20 | 2 | 38 | 5  | Co_Occurence       | RBM10, SETD2 | 2/43        |
| MED12  | ERBB2 | 0.459053 | 1.859618  | 22 | 1 | 17 | 7  | Co_Occurence       | ERBB2, MED12 | 1/24        |
| RBM10  | U2AF1 | 0.509054 | 1.73893   | 20 | 1 | 3  | 39 | Co_Occurence       | RBM10, U2AF1 | 1/42        |
| BRAF   | KRAS  | 0.566394 | 1.307931  | 22 | 1 | 14 | 12 | Co_Occurence       | BRAF, KRAS   | 1/26        |

|        |        |          |          |     |   |     |    |                    |               |       |
|--------|--------|----------|----------|-----|---|-----|----|--------------------|---------------|-------|
| TP53   | MAP2K1 | 0.600849 | 0        | 208 | 0 | 8   | 31 | Mutually_Exclusive | MAP2K1, TP53  | 0/39  |
| TP53   | MET    | 0.600849 | 0        | 209 | 0 | 7   | 31 | Mutually_Exclusive | MET, TP53     | 0/38  |
| RBM10  | MET    | 0.602259 | 0        | 200 | 0 | 7   | 40 | Mutually_Exclusive | MET, RBM10    | 0/47  |
| BRAF   | ERBB2  | 0.607008 | 0        | 216 | 0 | 18  | 13 | Mutually_Exclusive | BRAF, ERBB2   | 0/31  |
| ERBB2  | KRAS   | 0.610172 | 0        | 214 | 0 | 15  | 18 | Mutually_Exclusive | ERBB2, KRAS   | 0/33  |
| MED12  | RBM10  | 0.619305 | 1.758363 | 201 | 2 | 38  | 6  | Co_Occurence       | MED12, RBM10  | 2/44  |
| U2AF1  | EGFR   | 0.626844 | 0.579298 | 89  | 2 | 154 | 2  | Mutually_Exclusive | EGFR, U2AF1   | 2/156 |
| ERBB2  | TP53   | 0.708773 | 0.391283 | 199 | 1 | 30  | 17 | Mutually_Exclusive | ERBB2, TP53   | 1/47  |
| ERBB2  | RBM10  | 0.745559 | 0.629327 | 191 | 2 | 38  | 16 | Mutually_Exclusive | ERBB2, RBM10  | 2/54  |
| TP53   | RBM10  | 0.795342 | 0.741583 | 180 | 4 | 36  | 27 | Mutually_Exclusive | RBM10, TP53   | 4/63  |
| MET    | ERBB2  | 1        | 0        | 222 | 0 | 18  | 7  | Mutually_Exclusive | ERBB2, MET    | 0/25  |
| SETD2  | ERBB2  | 1        | 0        | 222 | 0 | 18  | 7  | Mutually_Exclusive | ERBB2, SETD2  | 0/25  |
| U2AF1  | ERBB2  | 1        | 0        | 225 | 0 | 18  | 4  | Mutually_Exclusive | ERBB2, U2AF1  | 0/22  |
| MAP2K1 | KRAS   | 1        | 0        | 224 | 0 | 15  | 8  | Mutually_Exclusive | KRAS, MAP2K1  | 0/23  |
| MED12  | KRAS   | 1        | 0        | 224 | 0 | 15  | 8  | Mutually_Exclusive | KRAS, MED12   | 0/23  |
| RBM10  | BRAF   | 1        | 0.938014 | 196 | 2 | 11  | 38 | Mutually_Exclusive | BRAF, RBM10   | 2/49  |
| MET    | BRAF   | 1        | 0        | 227 | 0 | 13  | 7  | Mutually_Exclusive | BRAF, MET     | 0/20  |
| SETD2  | BRAF   | 1        | 0        | 227 | 0 | 13  | 7  | Mutually_Exclusive | BRAF, SETD2   | 0/20  |
| MED12  | MAP2K1 | 1        | 0        | 231 | 0 | 8   | 8  | Mutually_Exclusive | MAP2K1, MED12 | 0/16  |
| NF1    | MAP2K1 | 1        | 0        | 231 | 0 | 8   | 8  | Mutually_Exclusive | MAP2K1, NF1   | 0/16  |
| U2AF1  | MAP2K1 | 1        | 0        | 235 | 0 | 8   | 4  | Mutually_Exclusive | MAP2K1, U2AF1 | 0/12  |
| NF1    | MED12  | 1        | 0        | 231 | 0 | 8   | 8  | Mutually_Exclusive | MED12, NF1    | 0/16  |

|        |        |   |          |    |   |    |    |                    |               |      |
|--------|--------|---|----------|----|---|----|----|--------------------|---------------|------|
| U2AF1  | MED12  | 1 | 0        | 23 | 0 | 8  | 4  | Mutually_Exclusive | MED12, U2AF1  | 0/12 |
| U2AF1  | NF1    | 1 | 0        | 23 | 0 | 8  | 4  | Mutually_Exclusive | NF1, U2AF1    | 0/12 |
| TP53   | U2AF1  | 1 | 0        | 21 | 0 | 4  | 31 | Mutually_Exclusive | TP53, U2AF1   | 0/35 |
| BRAF   | U2AF1  | 1 | 0        | 23 | 0 | 4  | 13 | Mutually_Exclusive | BRAF, U2AF1   | 0/17 |
| KRAS   | RBM10  | 1 | 0.786141 | 19 | 2 | 38 | 13 | Mutually_Exclusive | KRAS, RBM10   | 2/51 |
| MAP2K1 | RBM10  | 1 | 0.733437 | 20 | 1 | 39 | 7  | Mutually_Exclusive | MAP2K1, RBM10 | 1/46 |
| KRAS   | TP53   | 1 | 1.076611 | 20 | 2 | 29 | 13 | Co_Occurence       | KRAS, TP53    | 2/42 |
| BRAF   | TP53   | 1 | 0.567743 | 20 | 1 | 30 | 12 | Mutually_Exclusive | BRAF, TP53    | 1/42 |
| MED12  | TP53   | 1 | 0.995257 | 20 | 1 | 30 | 7  | Mutually_Exclusive | MED12, TP53   | 1/37 |
| NF1    | TP53   | 1 | 0.995257 | 20 | 1 | 30 | 7  | Mutually_Exclusive | NF1, TP53     | 1/37 |
| MAP2K1 | ERBB2  | 1 | 0        | 22 | 0 | 18 | 8  | Mutually_Exclusive | ERBB2, MAP2K1 | 0/26 |
| NF1    | ERBB2  | 1 | 0        | 22 | 0 | 18 | 8  | Mutually_Exclusive | ERBB2, NF1    | 0/26 |
| MET    | KRAS   | 1 | 0        | 22 | 0 | 15 | 7  | Mutually_Exclusive | KRAS, MET     | 0/22 |
| SETD2  | KRAS   | 1 | 0        | 22 | 0 | 15 | 7  | Mutually_Exclusive | KRAS, SETD2   | 0/22 |
| U2AF1  | KRAS   | 1 | 0        | 22 | 0 | 15 | 4  | Mutually_Exclusive | KRAS, U2AF1   | 0/19 |
| MAP2K1 | BRAF   | 1 | 0        | 22 | 0 | 13 | 8  | Mutually_Exclusive | BRAF, MAP2K1  | 0/21 |
| MED12  | BRAF   | 1 | 0        | 22 | 0 | 13 | 8  | Mutually_Exclusive | BRAF, MED12   | 0/21 |
| NF1    | BRAF   | 1 | 0        | 22 | 0 | 13 | 8  | Mutually_Exclusive | BRAF, NF1     | 0/21 |
| MET    | MAP2K1 | 1 | 0        | 23 | 0 | 8  | 7  | Mutually_Exclusive | MAP2K1, MET   | 0/15 |
| SETD2  | MAP2K1 | 1 | 0        | 23 | 0 | 8  | 7  | Mutually_Exclusive | MAP2K1, SETD2 | 0/15 |
| SETD2  | MED12  | 1 | 0        | 23 | 0 | 8  | 7  | Mutually_Exclusive | MED12, SETD2  | 0/15 |
| SETD2  | MET    | 1 | 0        | 23 | 0 | 7  | 7  | Mutually_Exclusive | MET, SETD2    | 0/14 |

|       |       |   |   |         |   |   |   |                        |              |      |
|-------|-------|---|---|---------|---|---|---|------------------------|--------------|------|
| U2AF1 | MET   | 1 | 0 | 23<br>6 | 0 | 7 | 4 | Mutually_Exclus<br>ive | MET, U2AF1   | 0/11 |
| U2AF1 | SETD2 | 1 | 0 | 23<br>6 | 0 | 7 | 4 | Mutually_Exclus<br>ive | SETD2, U2AF1 | 0/11 |

---

Table S9. Co-occurrence and Mutual Exclusivity of Driver Gene in pGGN Cohort

| gene1  | gene2 | pValue   | oddsRatio | 0 | 1 | 1 | 1 | Event              | pair               | event_ratio        |              |      |
|--------|-------|----------|-----------|---|---|---|---|--------------------|--------------------|--------------------|--------------|------|
| EGFR   | BRAF  | 0.000767 | 0         | 3 | 0 | 1 | 3 | Mutually_Exclusive | BRAF, EGFR         | 0/46               |              |      |
| RBM10  | SETD2 | 0.015379 | Inf       | 6 | 7 | 2 | 0 | 8                  | Co_Occurence       | RBM10, SETD2       | 2/8          |      |
| KRAS   | EGFR  | 0.015637 | 0         | 3 | 6 | 0 | 3 | 7                  | Mutually_Exclusive | EGFR, KRAS         | 0/41         |      |
| NF1    | SETD2 | 0.076897 | 30.00147  | 7 | 3 | 1 | 1 | 2                  | Co_Occurence       | NF1, SETD2         | 1/3          |      |
| RBM10  | EGFR  | 0.096867 | 3.401013  | 4 | 0 | 7 | 2 | 7                  | 3                  | Co_Occurence       | EGFR, RBM10  | 7/30 |
| ERBB2  | EGFR  | 0.171024 | 0.277594  | 3 | 5 | 2 | 3 | 2                  | 8                  | Mutually_Exclusive | EGFR, ERBB2  | 2/40 |
| SETD2  | EGFR  | 0.191729 | Inf       | 4 | 3 | 2 | 3 | 2                  | 0                  | Co_Occurence       | EGFR, SETD2  | 2/32 |
| MAP2K1 | EGFR  | 0.250513 | 0         | 4 | 0 | 0 | 3 | 4                  | 3                  | Mutually_Exclusive | EGFR, MAP2K1 | 0/37 |
| KRAS   | NF1   | 0.251675 | 5.438548  | 6 | 8 | 1 | 2 | 6                  | 6                  | Co_Occurence       | KRAS, NF1    | 1/8  |
| TP53   | KRAS  | 0.322462 | 3.622946  | 6 | 7 | 1 | 6 | 3                  | 3                  | Co_Occurence       | KRAS, TP53   | 1/9  |
| NF1    | RBM10 | 0.345113 | 3.522404  | 6 | 5 | 1 | 9 | 2                  | 2                  | Co_Occurence       | NF1, RBM10   | 1/11 |
| U2AF1  | RBM10 | 0.345113 | 3.522404  | 6 | 5 | 1 | 9 | 2                  | 2                  | Co_Occurence       | RBM10, U2AF1 | 1/11 |
| BRAF   | ERBB2 | 0.346643 | 0         | 5 | 5 | 0 | 1 | 0                  | 2                  | Mutually_Exclusive | BRAF, ERBB2  | 0/22 |
| RBM10  | TP53  | 0.433611 | 2.33571   | 6 | 4 | 1 | 3 | 9                  | 9                  | Co_Occurence       | RBM10, TP53  | 1/12 |
| TP53   | BRAF  | 0.499703 | 1.860275  | 6 | 2 | 1 | 1 | 3                  | 3                  | Co_Occurence       | BRAF, TP53   | 1/14 |
| MET    | EGFR  | 0.500342 | 0         | 4 | 1 | 0 | 3 | 4                  | 2                  | Mutually_Exclusive | EGFR, MET    | 0/36 |
| KRAS   | ERBB2 | 0.585016 | 0         | 6 | 0 | 0 | 1 | 0                  | 7                  | Mutually_Exclusive | ERBB2, KRAS  | 0/17 |
| EGFR   | TP53  | 0.625661 | 0.408402  | 4 | 0 | 1 | 3 | 3                  | 3                  | Mutually_Exclusive | EGFR, TP53   | 1/36 |
| BRAF   | RBM10 | 0.650316 | 1.417855  | 5 | 7 | 2 | 8 | 1                  | 0                  | Co_Occurence       | BRAF, RBM10  | 2/18 |
| NF1    | EGFR  | 1        | 0.624913  | 4 | 1 | 1 | 3 | 2                  | 3                  | Mutually_Exclusive | EGFR, NF1    | 1/35 |



|        |        |   |          |        |   |        |        |                    |               |      |
|--------|--------|---|----------|--------|---|--------|--------|--------------------|---------------|------|
| U2AF1  | EGFR   | 1 | 0.624913 | 4<br>1 | 1 | 3<br>3 | 2      | Mutually_Exclusive | EGFR, U2AF1   | 1/35 |
| MAP2K1 | TP53   | 1 | 0        | 7<br>0 | 0 | 4      | 3      | Mutually_Exclusive | MAP2K1, TP53  | 0/7  |
| NF1    | TP53   | 1 | 0        | 7<br>0 | 0 | 4      | 3      | Mutually_Exclusive | NF1, TP53     | 0/7  |
| U2AF1  | TP53   | 1 | 0        | 7<br>0 | 0 | 4      | 3      | Mutually_Exclusive | TP53, U2AF1   | 0/7  |
| RBM10  | KRAS   | 1 | 1.127811 | 6<br>1 | 1 | 6      | 9      | Co_Occurence       | KRAS, RBM10   | 1/15 |
| BRAF   | KRAS   | 1 | 0.895201 | 5<br>9 | 1 | 6      | 1      | Mutually_Exclusive | BRAF, KRAS    | 1/17 |
| KRAS   | MAP2K1 | 1 | 0        | 6<br>7 | 0 | 3      | 7      | Mutually_Exclusive | KRAS, MAP2K1  | 0/10 |
| BRAF   | MAP2K1 | 1 | 0        | 6<br>2 | 0 | 3      | 2      | Mutually_Exclusive | BRAF, MAP2K1  | 0/15 |
| BRAF   | NF1    | 1 | 0        | 6<br>2 | 0 | 3      | 2      | Mutually_Exclusive | BRAF, NF1     | 0/15 |
| KRAS   | MET    | 1 | 0        | 6<br>8 | 0 | 2      | 7      | Mutually_Exclusive | KRAS, MET     | 0/9  |
| MAP2K1 | MET    | 1 | 0        | 7<br>2 | 0 | 2      | 3      | Mutually_Exclusive | MAP2K1, MET   | 0/5  |
| NF1    | MET    | 1 | 0        | 7<br>2 | 0 | 2      | 3      | Mutually_Exclusive | MET, NF1      | 0/5  |
| U2AF1  | MET    | 1 | 0        | 7<br>2 | 0 | 2      | 3      | Mutually_Exclusive | MET, U2AF1    | 0/5  |
| KRAS   | SETD2  | 1 | 0        | 6<br>8 | 0 | 2      | 7      | Mutually_Exclusive | KRAS, SETD2   | 0/9  |
| MAP2K1 | SETD2  | 1 | 0        | 7<br>2 | 0 | 2      | 3      | Mutually_Exclusive | MAP2K1, SETD2 | 0/5  |
| U2AF1  | SETD2  | 1 | 0        | 7<br>2 | 0 | 2      | 3      | Mutually_Exclusive | SETD2, U2AF1  | 0/5  |
| KRAS   | U2AF1  | 1 | 0        | 6<br>7 | 0 | 3      | 7      | Mutually_Exclusive | KRAS, U2AF1   | 0/10 |
| BRAF   | U2AF1  | 1 | 0        | 6<br>2 | 0 | 3      | 2      | Mutually_Exclusive | BRAF, U2AF1   | 0/15 |
| ERBB2  | RBM10  | 1 | 0.718886 | 5<br>8 | 1 | 9      | 9      | Mutually_Exclusive | ERBB2, RBM10  | 1/18 |
| MAP2K1 | RBM10  | 1 | 0        | 6<br>4 | 0 | 1<br>0 | 3      | Mutually_Exclusive | MAP2K1, RBM10 | 0/13 |
| MET    | RBM10  | 1 | 0        | 6<br>5 | 0 | 1<br>0 | 2      | Mutually_Exclusive | MET, RBM10    | 0/12 |
| ERBB2  | TP53   | 1 | 0        | 6<br>3 | 0 | 4      | 1<br>0 | Mutually_Exclusive | ERBB2, TP53   | 0/14 |

|            |            |   |   |        |   |        |   |                        |                  |      |
|------------|------------|---|---|--------|---|--------|---|------------------------|------------------|------|
| MET        | TP53       | 1 | 0 | 7<br>1 | 0 | 4      | 2 | Mutually_Exclusi<br>ve | MET, TP53        | 0/6  |
| SETD2      | TP53       | 1 | 0 | 7<br>1 | 0 | 4      | 2 | Mutually_Exclusi<br>ve | SETD2, TP53      | 0/6  |
| MAP2K<br>1 | ERBB2      | 1 | 0 | 6<br>4 | 0 | 1<br>0 | 3 | Mutually_Exclusi<br>ve | ERBB2,<br>MAP2K1 | 0/13 |
| NF1        | ERBB2      | 1 | 0 | 6<br>4 | 0 | 1<br>0 | 3 | Mutually_Exclusi<br>ve | ERBB2, NF1       | 0/13 |
| MET        | ERBB2      | 1 | 0 | 6<br>5 | 0 | 1<br>0 | 2 | Mutually_Exclusi<br>ve | ERBB2, MET       | 0/12 |
| SETD2      | ERBB2      | 1 | 0 | 6<br>5 | 0 | 1<br>0 | 2 | Mutually_Exclusi<br>ve | ERBB2, SETD2     | 0/12 |
| U2AF1      | ERBB2      | 1 | 0 | 6<br>4 | 0 | 1<br>0 | 3 | Mutually_Exclusi<br>ve | ERBB2, U2AF1     | 0/13 |
| MET        | BRAF       | 1 | 0 | 6<br>3 | 0 | 1<br>2 | 2 | Mutually_Exclusi<br>ve | BRAF, MET        | 0/14 |
| SETD2      | BRAF       | 1 | 0 | 6<br>3 | 0 | 1<br>2 | 2 | Mutually_Exclusi<br>ve | BRAF, SETD2      | 0/14 |
| NF1        | MAP2K<br>1 | 1 | 0 | 7<br>1 | 0 | 3      | 3 | Mutually_Exclusi<br>ve | MAP2K1, NF1      | 0/6  |
| U2AF1      | MAP2K<br>1 | 1 | 0 | 7<br>1 | 0 | 3      | 3 | Mutually_Exclusi<br>ve | MAP2K1,<br>U2AF1 | 0/6  |
| U2AF1      | NF1        | 1 | 0 | 7<br>1 | 0 | 3      | 3 | Mutually_Exclusi<br>ve | NF1, U2AF1       | 0/6  |
| SETD2      | MET        | 1 | 0 | 7<br>3 | 0 | 2      | 2 | Mutually_Exclusi<br>ve | MET, SETD2       | 0/4  |

---

Table S10. Co-occurrence and Mutual Exclusivity of Driver Gene in HGGN Cohort.

| gene1 | gene2  | pValue   | oddsRatio | 0  | 1  | 1  | 1  | Event              | pair          | event_ratio |
|-------|--------|----------|-----------|----|----|----|----|--------------------|---------------|-------------|
| ERBB2 | EGFR   | 0.002316 | 0         | 15 | 06 | 26 | 77 | Mutually_Exclusive | EGFR, ERBB2   | 0/33        |
| EGFR  | MAP2K1 | 0.037594 | 0         | 18 | 04 | 26 | 66 | Mutually_Exclusive | EGFR, MAP2K1  | 0/30        |
| EGFR  | KRAS   | 0.204787 | 0         | 20 | 02 | 26 | 66 | Mutually_Exclusive | EGFR, KRAS    | 0/28        |
| RBM10 | EGFR   | 0.26029  | 2.935722  | 20 | 66 | 20 | 22 | Co_Occurence       | EGFR, RBM10   | 6/22        |
| MED12 | ERBB2  | 0.27305  | 6.248816  | 40 | 16 | 61 | 16 | Co_Occurence       | ERBB2, MED12  | 1/7         |
| MED12 | RBM10  | 0.308511 | 5.278088  | 39 | 17 | 71 | 16 | Co_Occurence       | MED12, RBM10  | 1/8         |
| EGFR  | BRAF   | 0.458333 | 0         | 21 | 01 | 16 | 26 | Mutually_Exclusive | BRAF, EGFR    | 0/27        |
| EGFR  | MET    | 0.458333 | 0         | 21 | 01 | 16 | 26 | Mutually_Exclusive | EGFR, MET     | 0/27        |
| TP53  | ERBB2  | 0.479546 | 2.070908  | 38 | 16 | 63 | 33 | Co_Occurence       | ERBB2, TP53   | 1/9         |
| RBM10 | TP53   | 0.530322 | 1.737862  | 37 | 13 | 37 | 77 | Co_Occurence       | RBM10, TP53   | 1/10        |
| TP53  | EGFR   | 0.614169 | 2.686965  | 21 | 33 | 23 | 13 | Co_Occurence       | EGFR, TP53    | 3/24        |
| MED12 | KRAS   | 1        | 0         | 44 | 02 | 22 | 22 | Mutually_Exclusive | KRAS, MED12   | 0/4         |
| ERBB2 | BRAF   | 1        | 0         | 40 | 01 | 77 | 77 | Mutually_Exclusive | BRAF, ERBB2   | 0/8         |
| RBM10 | MAP2K1 | 1        | 0         | 36 | 04 | 88 | 88 | Mutually_Exclusive | MAP2K1, RBM10 | 0/12        |
| ERBB2 | MET    | 1        | 0         | 40 | 01 | 77 | 77 | Mutually_Exclusive | ERBB2, MET    | 0/8         |
| MED12 | EGFR   | 1        | 0.843073  | 21 | 15 | 21 | 15 | Mutually_Exclusive | EGFR, MED12   | 1/26        |
| ERBB2 | RBM10  | 1        | 0.812919  | 34 | 17 | 76 | 66 | Mutually_Exclusive | ERBB2, RBM10  | 1/13        |
| KRAS  | RBM10  | 1        | 0         | 38 | 08 | 82 | 22 | Mutually_Exclusive | KRAS, RBM10   | 0/10        |
| BRAF  | RBM10  | 1        | 0         | 39 | 08 | 81 | 16 | Mutually_Exclusive | BRAF, RBM10   | 0/9         |
| MET   | RBM10  | 1        | 0         | 39 | 08 | 81 | 16 | Mutually_Exclusive | MET, RBM10    | 0/9         |

|        |        |   |   |        |   |   |   |                    |               |      |
|--------|--------|---|---|--------|---|---|---|--------------------|---------------|------|
| KRAS   | TP53   | 1 | 0 | 4<br>2 | 0 | 4 | 2 | Mutually_Exclusive | KRAS, TP53    | 0/6  |
| BRAF   | TP53   | 1 | 0 | 4<br>3 | 0 | 4 | 1 | Mutually_Exclusive | BRAF, TP53    | 0/5  |
| MAP2K1 | TP53   | 1 | 0 | 4<br>0 | 0 | 4 | 4 | Mutually_Exclusive | MAP2K1, TP53  | 0/8  |
| MED12  | TP53   | 1 | 0 | 4<br>2 | 0 | 4 | 2 | Mutually_Exclusive | MED12, TP53   | 0/6  |
| MET    | TP53   | 1 | 0 | 4<br>3 | 0 | 4 | 1 | Mutually_Exclusive | MET, TP53     | 0/5  |
| KRAS   | ERBB2  | 1 | 0 | 3<br>9 | 0 | 7 | 2 | Mutually_Exclusive | ERBB2, KRAS   | 0/9  |
| MAP2K1 | ERBB2  | 1 | 0 | 3<br>7 | 0 | 7 | 4 | Mutually_Exclusive | ERBB2, MAP2K1 | 0/11 |
| BRAF   | KRAS   | 1 | 0 | 4<br>5 | 0 | 2 | 1 | Mutually_Exclusive | BRAF, KRAS    | 0/3  |
| MAP2K1 | KRAS   | 1 | 0 | 4<br>2 | 0 | 2 | 4 | Mutually_Exclusive | KRAS, MAP2K1  | 0/6  |
| MET    | KRAS   | 1 | 0 | 4<br>5 | 0 | 2 | 1 | Mutually_Exclusive | KRAS, MET     | 0/3  |
| MAP2K1 | BRAF   | 1 | 0 | 4<br>3 | 0 | 1 | 4 | Mutually_Exclusive | BRAF, MAP2K1  | 0/5  |
| MED12  | BRAF   | 1 | 0 | 4<br>5 | 0 | 1 | 2 | Mutually_Exclusive | BRAF, MED12   | 0/3  |
| MET    | BRAF   | 1 | 0 | 4<br>6 | 0 | 1 | 1 | Mutually_Exclusive | BRAF, MET     | 0/2  |
| MED12  | MAP2K1 | 1 | 0 | 4<br>2 | 0 | 4 | 2 | Mutually_Exclusive | MAP2K1, MED12 | 0/6  |
| MET    | MAP2K1 | 1 | 0 | 4<br>3 | 0 | 4 | 1 | Mutually_Exclusive | MAP2K1, MET   | 0/5  |
| MET    | MED12  | 1 | 0 | 4<br>5 | 0 | 2 | 1 | Mutually_Exclusive | MED12, MET    | 0/3  |

Table S11. Co-occurrence and Mutual Exclusivity of Driver Gene in PSN Cohort.

| gene1  | gene2 | pValue   | oddsRatio | 0  | 1 | 1 | 1 | Event              | pair               | event_ratio   |       |
|--------|-------|----------|-----------|----|---|---|---|--------------------|--------------------|---------------|-------|
| KRAS   | EGFR  | 5.70E-05 | 0         | 20 | 0 | 9 | 6 | Mutually_Exclusive | EGFR, KRAS         | 0/102         |       |
| MET    | EGFR  | 0.001702 | 0         | 22 | 0 | 9 | 4 | Mutually_Exclusive | EGFR, MET          | 0/100         |       |
| EGFR   | MED12 | 0.018485 | 0.119935  | 22 | 2 | 4 | 9 | Mutually_Exclusive | EGFR, MED12        | 2/98          |       |
| EGFR   | NF1   | 0.064437 | 0.166494  | 23 | 2 | 3 | 9 | Mutually_Exclusive | EGFR, NF1          | 2/97          |       |
| MET    | NF1   | 0.15594  | 9.061337  | 11 | 4 | 1 | 4 | 3                  | Co_Occurence       | MET, NF1      | 1/7   |
| RBM10  | EGFR  | 0.156564 | 3.134555  | 24 | 0 | 2 | 7 | 2                  | Co_Occurence       | EGFR, RBM10   | 20/78 |
| MAP2K1 | RBM10 | 0.180328 | Inf       | 10 | 0 | 1 | 2 | 0                  | Co_Occurence       | MAP2K1, RBM10 | 1/21  |
| MED12  | MET   | 0.184797 | 7.255076  | 11 | 3 | 1 | 3 | 5                  | Co_Occurence       | MED12, MET    | 1/8   |
| EGFR   | ERBB2 | 0.213115 | 0         | 25 | 0 | 1 | 9 | 6                  | Mutually_Exclusive | EGFR, ERBB2   | 0/97  |
| NF1    | RBM10 | 0.220628 | 3.191895  | 97 | 2 | 2 | 0 | 3                  | Co_Occurence       | NF1, RBM10    | 2/23  |
| NF1    | KRAS  | 0.226248 | 5.4435    | 11 | 2 | 1 | 5 | 4                  | Co_Occurence       | KRAS, NF1     | 1/9   |
| SETD2  | TP53  | 0.237275 | 3.011054  | 96 | 2 | 2 | 1 | 3                  | Co_Occurence       | SETD2, TP53   | 2/24  |
| TP53   | RBM10 | 0.243292 | 0.378628  | 79 | 2 | 2 | 0 | 2                  | Mutually_Exclusive | RBM10, TP53   | 2/41  |
| EGFR   | TP53  | 0.399779 | 2.007438  | 23 | 0 | 2 | 3 | 7                  | Co_Occurence       | EGFR, TP53    | 20/79 |
| RBM10  | SETD2 | 0.58383  | 0         | 95 | 0 | 5 | 2 | 2                  | Mutually_Exclusive | RBM10, SETD2  | 0/27  |
| MAP2K1 | EGFR  | 1        | Inf       | 26 | 1 | 9 | 5 | 0                  | Co_Occurence       | EGFR, MAP2K1  | 1/95  |
| SETD2  | EGFR  | 1        | 1.08623   | 25 | 4 | 9 | 2 | 1                  | Co_Occurence       | EGFR, SETD2   | 4/93  |
| U2AF1  | EGFR  | 1        | Inf       | 26 | 1 | 9 | 5 | 0                  | Co_Occurence       | EGFR, U2AF1   | 1/95  |
| NF1    | TP53  | 1        | 1.078867  | 95 | 1 | 2 | 2 | 4                  | Co_Occurence       | NF1, TP53     | 1/26  |
| TP53   | KRAS  | 1        | 0.855599  | 94 | 1 | 5 | 2 | 2                  | Mutually_Exclusive | KRAS, TP53    | 1/27  |

|        |       |   |          |     |   |    |   |                    |               |      |
|--------|-------|---|----------|-----|---|----|---|--------------------|---------------|------|
| TP53   | MED12 | 1 | 0.855599 | 94  | 1 | 5  | 2 | Mutually_Exclusive | MED12, TP53   | 1/27 |
| KRAS   | MET   | 1 | 0        | 112 | 0 | 4  | 6 | Mutually_Exclusive | KRAS, MET     | 0/10 |
| MET    | SETD2 | 1 | 0        | 113 | 0 | 5  | 4 | Mutually_Exclusive | MET, SETD2    | 0/9  |
| ERBB2  | RBM10 | 1 | 0        | 99  | 0 | 22 | 1 | Mutually_Exclusive | ERBB2, RBM10  | 0/23 |
| KRAS   | RBM10 | 1 | 0.905483 | 95  | 1 | 21 | 5 | Mutually_Exclusive | KRAS, RBM10   | 1/26 |
| MED12  | RBM10 | 1 | 0.905483 | 95  | 1 | 21 | 5 | Mutually_Exclusive | MED12, RBM10  | 1/26 |
| MET    | RBM10 | 1 | 0        | 96  | 0 | 22 | 4 | Mutually_Exclusive | MET, RBM10    | 0/26 |
| U2AF1  | RBM10 | 1 | 0        | 99  | 0 | 22 | 1 | Mutually_Exclusive | RBM10, U2AF1  | 0/23 |
| ERBB2  | TP53  | 1 | 0        | 98  | 0 | 23 | 1 | Mutually_Exclusive | ERBB2, TP53   | 0/24 |
| MAP2K1 | TP53  | 1 | 0        | 98  | 0 | 23 | 1 | Mutually_Exclusive | MAP2K1, TP53  | 0/24 |
| MET    | TP53  | 1 | 0        | 95  | 0 | 23 | 4 | Mutually_Exclusive | MET, TP53     | 0/27 |
| U2AF1  | TP53  | 1 | 0        | 98  | 0 | 23 | 1 | Mutually_Exclusive | TP53, U2AF1   | 0/24 |
| KRAS   | ERBB2 | 1 | 0        | 115 | 0 | 1  | 6 | Mutually_Exclusive | ERBB2, KRAS   | 0/7  |
| MAP2K1 | ERBB2 | 1 | 0        | 120 | 0 | 1  | 1 | Mutually_Exclusive | ERBB2, MAP2K1 | 0/2  |
| MED12  | ERBB2 | 1 | 0        | 115 | 0 | 1  | 6 | Mutually_Exclusive | ERBB2, MED12  | 0/7  |
| NF1    | ERBB2 | 1 | 0        | 116 | 0 | 1  | 5 | Mutually_Exclusive | ERBB2, NF1    | 0/6  |
| MET    | ERBB2 | 1 | 0        | 117 | 0 | 1  | 4 | Mutually_Exclusive | ERBB2, MET    | 0/5  |
| SETD2  | ERBB2 | 1 | 0        | 116 | 0 | 1  | 5 | Mutually_Exclusive | ERBB2, SETD2  | 0/6  |
| U2AF1  | ERBB2 | 1 | 0        | 120 | 0 | 1  | 1 | Mutually_Exclusive | ERBB2, U2AF1  | 0/2  |
| MAP2K1 | KRAS  | 1 | 0        | 115 | 0 | 6  | 1 | Mutually_Exclusive | KRAS, MAP2K1  | 0/7  |
| MED12  | KRAS  | 1 | 0        | 110 | 0 | 6  | 6 | Mutually_Exclusive | KRAS, MED12   | 0/12 |
| SETD2  | KRAS  | 1 | 0        | 111 | 0 | 6  | 5 | Mutually_Exclusive | KRAS, SETD2   | 0/11 |

|       |            |   |   |         |   |   |   |                        |                  |      |
|-------|------------|---|---|---------|---|---|---|------------------------|------------------|------|
| U2AF1 | KRAS       | 1 | 0 | 11<br>5 | 0 | 6 | 1 | Mutually_Exclusi<br>ve | KRAS, U2AF1      | 0/7  |
| MED12 | MAP2K<br>1 | 1 | 0 | 11<br>5 | 0 | 1 | 6 | Mutually_Exclusi<br>ve | MAP2K1,<br>MED12 | 0/7  |
| NF1   | MAP2K<br>1 | 1 | 0 | 11<br>6 | 0 | 1 | 5 | Mutually_Exclusi<br>ve | MAP2K1, NF1      | 0/6  |
| MET   | MAP2K<br>1 | 1 | 0 | 11<br>7 | 0 | 1 | 4 | Mutually_Exclusi<br>ve | MAP2K1, MET      | 0/5  |
| SETD2 | MAP2K<br>1 | 1 | 0 | 11<br>6 | 0 | 1 | 5 | Mutually_Exclusi<br>ve | MAP2K1,<br>SETD2 | 0/6  |
| U2AF1 | MAP2K<br>1 | 1 | 0 | 12<br>0 | 0 | 1 | 1 | Mutually_Exclusi<br>ve | MAP2K1,<br>U2AF1 | 0/2  |
| NF1   | MED12      | 1 | 0 | 11<br>1 | 0 | 6 | 5 | Mutually_Exclusi<br>ve | MED12, NF1       | 0/11 |
| SETD2 | MED12      | 1 | 0 | 11<br>1 | 0 | 6 | 5 | Mutually_Exclusi<br>ve | MED12, SETD2     | 0/11 |
| U2AF1 | MED12      | 1 | 0 | 11<br>5 | 0 | 6 | 1 | Mutually_Exclusi<br>ve | MED12, U2AF1     | 0/7  |
| SETD2 | NF1        | 1 | 0 | 11<br>2 | 0 | 5 | 5 | Mutually_Exclusi<br>ve | NF1, SETD2       | 0/10 |
| U2AF1 | NF1        | 1 | 0 | 11<br>6 | 0 | 5 | 1 | Mutually_Exclusi<br>ve | NF1, U2AF1       | 0/6  |
| U2AF1 | MET        | 1 | 0 | 11<br>7 | 0 | 4 | 1 | Mutually_Exclusi<br>ve | MET, U2AF1       | 0/5  |
| U2AF1 | SETD2      | 1 | 0 | 11<br>6 | 0 | 5 | 1 | Mutually_Exclusi<br>ve | SETD2, U2AF1     | 0/6  |

---

77 Table S12. Pathway Alteration Comparison between Radiologic Subtypes (Alteration Frequency >  
 78 0.01 were included).

| Fisher's Exact Test (pGGN vs. HGGN) |              |                |              |                |               |              |              |              |              |         |
|-------------------------------------|--------------|----------------|--------------|----------------|---------------|--------------|--------------|--------------|--------------|---------|
| Pathway                             | pGGN_mut_num | pGGN_nomut_num | HGGN_mut_num | HGGN_nomut_num | total_mutfreq | pGGN_mutfreq | HGGN_mutfreq | mut_diff     | p_value      | q_value |
| RTK_RAS                             | 50           | 27             | 37           | 11             | 0.696         | 0.64935<br>1 | 0.77083<br>3 | 0.1214<br>83 | 0.167<br>217 | 1       |
| p53                                 | 6            | 71             | 3            | 45             | 0.072         | 0.07792<br>2 | 0.0625       | 0.0154<br>22 | 1            | 1       |
| RNA_splicing                        | 9            | 68             | 4            | 44             | 0.104         | 0.11688<br>3 | 0.08333<br>3 | 0.0335<br>5  | 0.764<br>694 | 1       |
| PI3K                                | 5            | 72             | 3            | 45             | 0.064         | 0.06493<br>5 | 0.0625       | 0.0024<br>35 | 1            | 1       |
| Cell_cycle                          | 2            | 75             | 1            | 47             | 0.024         | 0.02597<br>4 | 0.02083<br>3 | 0.0051<br>41 | 1            | 1       |
| Myc                                 | 3            | 74             | 2            | 46             | 0.04          | 0.03896<br>1 | 0.04166<br>7 | 0.0027<br>06 | 1            | 1       |
| Wnt                                 | 0            | 77             | 1            | 47             | 0.008         | 0            | 0.02083<br>3 | 0.0208<br>33 | 0.384        | 1       |
| Hippo                               | 0            | 77             | 0            | 48             | 0             | 0            | 0            | 0            | 1            | 1       |
| Notch                               | 2            | 75             | 0            | 48             | 0.016         | 0.02597<br>4 | 0            | 0.0259<br>74 | 0.523<br>097 | 1       |
| TGFB                                | 0            | 77             | 0            | 48             | 0             | 0            | 0            | 0            | 1            | 1       |

| Fisher's Exact Test (pGGN vs. PSN) |              |                |             |               |               |              |              |              |              |                                       |
|------------------------------------|--------------|----------------|-------------|---------------|---------------|--------------|--------------|--------------|--------------|---------------------------------------|
| Pathway                            | pGGN_mut_num | pGGN_nomut_num | PSN_mut_num | PSN_nomut_num | total_mutfreq | pGGN_mutfreq | PSN_mutfreq  | mut_diff     | p_value      | q_value                               |
| RTK_RAS                            | 50           | 27             | 93          | 29            | 0.7185<br>93  | 0.64935<br>1 | 0.76229<br>5 | 0.1129<br>44 | 0.105<br>526 | 0.31<br>981<br>3                      |
| p53                                | 6            | 71             | 31          | 91            | 0.1859<br>3   | 0.07792<br>2 | 0.25409<br>8 | 0.1761<br>76 | 0.002<br>397 | <b>0.02</b><br><b>397</b><br><b>1</b> |
| RNA_splicing                       | 9            | 68             | 18          | 104           | 0.1356<br>78  | 0.11688<br>3 | 0.14754<br>1 | 0.0306<br>58 | 0.671<br>835 | 0.67<br>849<br>2                      |
| PI3K                               | 5            | 72             | 11          | 111           | 0.0804<br>02  | 0.06493<br>5 | 0.09016<br>4 | 0.0252<br>29 | 0.601<br>549 | 0.67<br>849<br>2                      |



|           |   |    |    |     |          |          |          |          |          |          |
|-----------|---|----|----|-----|----------|----------|----------|----------|----------|----------|
| Cell_ycle | 2 | 75 | 12 | 110 | 0.070352 | 0.025974 | 0.098361 | 0.072387 | 0.084428 | 0.319813 |
| Myc       | 3 | 74 | 3  | 119 | 0.030151 | 0.038961 | 0.02459  | 0.014371 | 0.678492 | 0.678492 |
| Wnt       | 0 | 77 | 4  | 118 | 0.020101 | 0        | 0.032787 | 0.032787 | 0.159906 | 0.319813 |
| Hippo     | 0 | 77 | 3  | 119 | 0.015075 | 0        | 0.02459  | 0.02459  | 0.284757 | 0.474595 |
| Notch     | 2 | 75 | 0  | 122 | 0.01005  | 0.025974 | 0        | 0.025974 | 0.14852  | 0.319813 |
| TGFB      | 0 | 77 | 2  | 120 | 0.01005  | 0        | 0.016393 | 0.016393 | 0.523171 | 0.678492 |

#### Fisher's Exact Test (HGGN vs. PSN)

| Pathway      | HGGN_mut_num | HGGN_nomut_num | PSN_mut_num | PSN_nomut_num | total_mutfreq | HGGN_mutfreq | PSN_mutfreq | mut_diff | p_value  | q_value         |
|--------------|--------------|----------------|-------------|---------------|---------------|--------------|-------------|----------|----------|-----------------|
| RTK_RAS      | 37           | 11             | 93          | 29            | 0.764706      | 0.770833     | 0.762295    | 0.008538 | 1        | 1               |
| p53          | 3            | 45             | 31          | 91            | 0.2           | 0.0625       | 0.254098    | 0.191598 | 0.004964 | <b>0.049642</b> |
| RNA_splicing | 4            | 44             | 18          | 104           | 0.129412      | 0.083333     | 0.147541    | 0.064208 | 0.318674 | 1               |
| PI3K         | 3            | 45             | 11          | 111           | 0.082353      | 0.0625       | 0.090164    | 0.027664 | 0.759329 | 1               |
| Cell_ycle    | 1            | 47             | 12          | 110           | 0.076471      | 0.020833     | 0.098361    | 0.077527 | 0.113279 | 0.566395        |
| Myc          | 2            | 46             | 3           | 119           | 0.029412      | 0.041667     | 0.02459     | 0.017077 | 0.621893 | 1               |
| Wnt          | 1            | 47             | 4           | 118           | 0.029412      | 0.020833     | 0.032787    | 0.011954 | 1        | 1               |
| Hippo        | 0            | 48             | 3           | 119           | 0.017647      | 0            | 0.02459     | 0.02459  | 0.559584 | 1               |
| Notch        | 0            | 48             | 0           | 122           | 0             | 0            | 0           | 0        | 1        | 1               |

|      |   |    |   |     |              |   |              |              |   |   |
|------|---|----|---|-----|--------------|---|--------------|--------------|---|---|
| TGFB | 0 | 48 | 2 | 120 | 0.0117<br>65 | 0 | 0.01639<br>3 | 0.0163<br>93 | 1 | 1 |
|------|---|----|---|-----|--------------|---|--------------|--------------|---|---|

**Cochran-Armitage Trend Test**

| Pathway          | pGGN_<br>mut_num | pGGN_<br>no<br>mut_num | HGGN_<br>mut_num | HGGN_<br>n<br>mut_num | PSN_<br>mut_num | PSN_<br>no<br>mut_num | pGGN_<br>mutfreq | HGGN_<br>mutfreq | PSN_<br>mutfreq | p_value                   |
|------------------|------------------|------------------------|------------------|-----------------------|-----------------|-----------------------|------------------|------------------|-----------------|---------------------------|
| RTK_<br>RAS      | 50               | 27                     | 37               | 11                    | 93              | 29                    | 0.64935<br>1     | 0.7708<br>33     | 0.762<br>295    | 0.09<br>653               |
| p53              | 6                | 71                     | 3                | 45                    | 31              | 91                    | 0.07792<br>2     | 0.0625           | 0.254<br>098    | <b>0.00<br/>05</b>        |
| RNA_<br>splicing | 9                | 68                     | 4                | 44                    | 18              | 104                   | 0.11688<br>3     | 0.0833<br>33     | 0.147<br>541    | 0.46<br>383<br>9          |
| PI3K             | 5                | 72                     | 3                | 45                    | 11              | 111                   | 0.06493<br>5     | 0.0625           | 0.090<br>164    | 0.49<br>041<br>1          |
| Cell_<br>cycle   | 2                | 75                     | 1                | 47                    | 12              | 110                   | 0.02597<br>4     | 0.0208<br>33     | 0.098<br>361    | <b>0.02<br/>760<br/>6</b> |
| Myc              | 3                | 74                     | 2                | 46                    | 3               | 119                   | 0.03896<br>1     | 0.0416<br>67     | 0.024<br>59     | 0.55<br>115<br>6          |
| Wnt              | 0                | 77                     | 1                | 47                    | 4               | 118                   | 0                | 0.0208<br>33     | 0.032<br>787    | 0.11<br>229<br>4          |
| Hippo            | 0                | 77                     | 0                | 48                    | 3               | 119                   | 0                | 0                | 0.024<br>59     | 0.10<br>490<br>3          |
| Notch            | 2                | 75                     | 0                | 48                    | 0               | 122                   | 0.02597<br>4     | 0                | 0               | 0.05<br>613<br>9          |
| TGFB             | 0                | 77                     | 0                | 48                    | 2               | 120                   | 0                | 0                | 0.016<br>393    | 0.18<br>641<br>1          |

Table S13. Pathway Alteration Comparison between Radiologic Subtypes (WES Cohort).

| Fisher's Exact Test (pGGN vs. HGGN) |              |                |              |                |               |              |              |              |              |                  |
|-------------------------------------|--------------|----------------|--------------|----------------|---------------|--------------|--------------|--------------|--------------|------------------|
| Pathway                             | pGGN_mut_num | pGGN_nomut_num | HGGN_mut_num | HGGN_nomut_num | total_mutfreq | pGGN_mutfreq | HGGN_mutfreq | mut_dif      | p_value      | q_value          |
| RTK_RAS                             | 25           | 23             | 16           | 13             | 0.5324<br>68  | 0.52083<br>3 | 0.55172<br>4 | 0.03089<br>1 | 0.8179<br>45 | 0.81<br>794<br>5 |
| RNA_splicing                        | 3            | 45             | 7            | 22             | 0.1298<br>7   | 0.0625       | 0.24137<br>9 | 0.17887<br>9 | 0.0354<br>41 | 0.14<br>176<br>3 |
| p53                                 | 3            | 45             | 5            | 24             | 0.1038<br>96  | 0.0625       | 0.17241<br>4 | 0.10991<br>4 | 0.1447<br>75 | 0.28<br>955      |
| PI3K                                | 5            | 43             | 1            | 28             | 0.0779<br>22  | 0.10416<br>7 | 0.03448<br>3 | 0.06968<br>4 | 0.4002<br>41 | 0.53<br>365<br>5 |

| Fisher's Exact Test (pGGN vs. PSN) |              |                |             |               |               |              |              |              |              |                                       |
|------------------------------------|--------------|----------------|-------------|---------------|---------------|--------------|--------------|--------------|--------------|---------------------------------------|
| Pathway                            | pGGN_mut_num | pGGN_nomut_num | PSN_mut_num | PSN_nomut_num | total_mutfreq | pGGN_mutfreq | PSN_mutfreq  | mut_dif      | p_value      | q_value                               |
| RTK_RAS                            | 25           | 23             | 37          | 11            | 0.6458<br>33  | 0.52083<br>3 | 0.77083<br>3 | 0.25         | 0.0182<br>61 | <b>0.02</b><br><b>434</b><br><b>8</b> |
| RNA_splicing                       | 3            | 45             | 13          | 35            | 0.1666<br>67  | 0.0625       | 0.27083<br>3 | 0.20833<br>3 | 0.0118<br>86 | <b>0.02</b><br><b>377</b><br><b>1</b> |
| p53                                | 3            | 45             | 13          | 35            | 0.1666<br>67  | 0.0625       | 0.27083<br>3 | 0.20833<br>3 | 0.0118<br>86 | <b>0.02</b><br><b>377</b><br><b>1</b> |
| PI3K                               | 5            | 43             | 3           | 45            | 0.0833<br>33  | 0.10416<br>7 | 0.0625       | 0.04166<br>7 | 0.7144<br>71 | 0.71<br>447<br>1                      |

| Fisher's Exact Test (HGGN vs. PSN) |              |                |             |               |               |              |              |              |              |                  |
|------------------------------------|--------------|----------------|-------------|---------------|---------------|--------------|--------------|--------------|--------------|------------------|
| Pathway                            | HGGN_mut_num | HGGN_nomut_num | PSN_mut_num | PSN_nomut_num | total_mutfreq | HGGN_mutfreq | PSN_mutfreq  | mut_dif      | p_value      | q_value          |
| RTK_RAS                            | 16           | 13             | 37          | 11            | 0.6883<br>12  | 0.55172<br>4 | 0.77083<br>3 | 0.21910<br>9 | 0.0742<br>15 | 0.29<br>686<br>2 |
| RNA_splicing                       | 7            | 22             | 13          | 35            | 0.2597<br>4   | 0.24137<br>9 | 0.27083<br>3 | 0.02945<br>4 | 1            | 1                |

|      |   |    |    |    |              |              |              |              |              |                  |
|------|---|----|----|----|--------------|--------------|--------------|--------------|--------------|------------------|
| p53  | 5 | 24 | 13 | 35 | 0.2337<br>66 | 0.17241<br>4 | 0.27083<br>3 | 0.09842      | 0.4102<br>37 | 0.82<br>047<br>3 |
| PI3K | 1 | 28 | 3  | 45 | 0.0519<br>48 | 0.03448<br>3 | 0.0625       | 0.02801<br>7 | 1            | 1                |

**Cochran-Armitage Trend Test**

| Pathway          | pGGN_<br>mut_num | pGGN_<br>nmut_num | HGGN_<br>mut_num | HGGN_<br>nmut_num | PSN_<br>mut_num | PSN_<br>nmut_num | pGGN_<br>mutfreq | HGGN_<br>mutfreq | PSN_<br>mutfreq | p_value                   |
|------------------|------------------|-------------------|------------------|-------------------|-----------------|------------------|------------------|------------------|-----------------|---------------------------|
| RTK_<br>RAS      | 25               | 23                | 16               | 13                | 37              | 11               | 0.52083<br>3     | 0.55172<br>4     | 0.7708<br>33    | <b>0.01<br/>145<br/>6</b> |
| RNA_<br>splicing | 3                | 45                | 7                | 22                | 13              | 35               | 0.0625           | 0.24137<br>9     | 0.2708<br>33    | <b>0.00<br/>843<br/>9</b> |
| p53              | 3                | 45                | 5                | 24                | 13              | 35               | 0.0625           | 0.17241<br>4     | 0.2708<br>33    | <b>0.00<br/>633<br/>5</b> |
| PI3K             | 5                | 43                | 1                | 28                | 3               | 45               | 0.10416<br>7     | 0.03448<br>3     | 0.0625          | 0.42<br>971<br>1          |

Table S14. Pathway Alteration Comparison between Radiologic Subtypes (IAC).

| Fisher's Exact Test (pGGN vs. HGGN) |              |               |              |               |               |              |              |            |            |         |
|-------------------------------------|--------------|---------------|--------------|---------------|---------------|--------------|--------------|------------|------------|---------|
| Pathway                             | pGGN_mut_num | pGGN_omut_num | HGGN_mut_num | HGGN_omut_num | total_mutfreq | pGGN_mutfreq | HGGN_mutfreq | mut_diff   | p_value    | q_value |
| RTK_RAS                             | 22           | 9             | 25           | 6             | 0.75806452    | 0.70967742   | 0.80645161   | 0.09677419 | 0.55414549 | 1       |
| p53                                 | 4            | 27            | 3            | 28            | 0.11290323    | 0.12903226   | 0.09677419   | 0.03225806 | 1          | 1       |
| RNA_splicing                        | 6            | 25            | 3            | 28            | 0.14516129    | 0.19354839   | 0.09677419   | 0.09677419 | 0.47292775 | 1       |
| PI3K                                | 2            | 29            | 2            | 29            | 0.06451613    | 0.06451613   | 0.06451613   | 0          | 1          | 1       |
| Cell_cycle                          | 1            | 30            | 1            | 30            | 0.03225806    | 0.03225806   | 0.03225806   | 0          | 1          | 1       |
| Myc                                 | 2            | 29            | 1            | 30            | 0.0483871     | 0.06451613   | 0.03225806   | 0.03225806 | 1          | 1       |
| Wnt                                 | 0            | 31            | 1            | 30            | 0.01612903    | 0            | 0.03225806   | 0.03225806 | 1          | 1       |
| Hippo                               | 0            | 31            | 0            | 31            | 0             | 0            | 0            | 0          | 1          | 1       |

| Fisher's Exact Test (pGGN vs. PSN) |              |               |             |              |               |              |             |            |            |            |
|------------------------------------|--------------|---------------|-------------|--------------|---------------|--------------|-------------|------------|------------|------------|
| Pathway                            | pGGN_mut_num | pGGN_omut_num | PSN_mut_num | PSN_omut_num | total_mutfreq | pGGN_mutfreq | PSN_mutfreq | mut_diff   | p_value    | q_value    |
| RTK_RAS                            | 22           | 9             | 90          | 25           | 0.76712329    | 0.70967742   | 0.7826087   | 0.07293128 | 0.472834   | 0.77148103 |
| p53                                | 4            | 27            | 31          | 84           | 0.23972603    | 0.12903226   | 0.26956522  | 0.14053296 | 0.15370098 | 0.77148103 |
| RNA_splicing                       | 6            | 25            | 16          | 99           | 0.15068493    | 0.19354839   | 0.13913043  | 0.05441795 | 0.57112231 | 0.77148103 |
| PI3K                               | 2            | 29            | 10          | 105          | 0.08219178    | 0.06451613   | 0.08695652  | 0.02244039 | 1          | 1          |
| Cell_cycle                         | 1            | 30            | 11          | 104          | 0.08219178    | 0.03225806   | 0.09565217  | 0.06339411 | 0.46158636 | 0.77148103 |
| Myc                                | 2            | 29            | 2           | 113          | 0.02739726    | 0.06451613   | 0.0173913   | 0.04712482 | 0.19800114 | 0.77148103 |

|       |   |    |   |     |                |   |                |                |                |                    |
|-------|---|----|---|-----|----------------|---|----------------|----------------|----------------|--------------------|
| Wnt   | 0 | 31 | 4 | 111 | 0.0273<br>9726 | 0 | 0.03478<br>261 | 0.0347<br>8261 | 0.578<br>61077 | 0.771<br>4810<br>3 |
| Hippo | 0 | 31 | 3 | 112 | 0.0205<br>4795 | 0 | 0.02608<br>696 | 0.0260<br>8696 | 1              | 1                  |

**Fisher's Exact Test (HGGN vs. PSN)**

| Pathway      | HGGN_mut_num | HGGN_nomut_num | PSN_mut_num | PSN_nomut_num | total_mutfreq  | HGGN_mutfreq   | PSN_mutfreq    | mut_diff       | p_value        | q_value            |
|--------------|--------------|----------------|-------------|---------------|----------------|----------------|----------------|----------------|----------------|--------------------|
| RTK_RAS      | 25           | 6              | 90          | 25            | 0.7876<br>7123 | 0.80645<br>161 | 0.78260<br>87  | 0.0238<br>4292 | 1              | 1                  |
| p53          | 3            | 28             | 31          | 84            | 0.2328<br>7671 | 0.09677<br>419 | 0.26956<br>522 | 0.1727<br>9102 | 0.054<br>72575 | 0.437<br>8060<br>2 |
| RNA_splicing | 3            | 28             | 16          | 99            | 0.1301<br>3699 | 0.09677<br>419 | 0.13913<br>043 | 0.0423<br>5624 | 0.764<br>78113 | 1                  |
| PI3K         | 2            | 29             | 10          | 105           | 0.0821<br>9178 | 0.06451<br>613 | 0.08695<br>652 | 0.0224<br>4039 | 1              | 1                  |
| Cell_cycle   | 1            | 30             | 11          | 104           | 0.0821<br>9178 | 0.03225<br>806 | 0.09565<br>217 | 0.0633<br>9411 | 0.461<br>58636 | 1                  |
| Myc          | 1            | 30             | 2           | 113           | 0.0205<br>4795 | 0.03225<br>806 | 0.01739<br>13  | 0.0148<br>6676 | 0.514<br>04306 | 1                  |
| Wnt          | 1            | 30             | 4           | 111           | 0.0342<br>4658 | 0.03225<br>806 | 0.03478<br>261 | 0.0025<br>2454 | 1              | 1                  |
| Hippo        | 0            | 31             | 3           | 112           | 0.0205<br>4795 | 0              | 0.02608<br>696 | 0.0260<br>8696 | 1              | 1                  |

**Cochran-Armitage Trend Test**

| Pathway      | pGGN_mut_num | pGGN_nomut_num | HGGN_mut_num | HGGN_nomut_num | PSN_mut_num | PSN_nomut_num | pGGN_mutfreq   | HGGN_mutfreq   | PSN_mutfreq    | p_value                                 |
|--------------|--------------|----------------|--------------|----------------|-------------|---------------|----------------|----------------|----------------|-----------------------------------------|
| RTK_RAS      | 22           | 9              | 25           | 6              | 90          | 25            | 0.70967<br>742 | 0.8064<br>5161 | 0.782<br>6087  | 0.488<br>7301<br>5                      |
| p53          | 4            | 27             | 3            | 28             | 31          | 84            | 0.12903<br>226 | 0.0967<br>7419 | 0.269<br>56522 | <b>0.034</b><br><b>0425</b><br><b>6</b> |
| RNA_splicing | 6            | 25             | 3            | 28             | 16          | 99            | 0.19354<br>839 | 0.0967<br>7419 | 0.139<br>13043 | 0.603<br>3236<br>5                      |

|                |   |    |   |    |    |     |                |                |                |                    |
|----------------|---|----|---|----|----|-----|----------------|----------------|----------------|--------------------|
| PI3K           | 2 | 29 | 2 | 29 | 10 | 105 | 0.06451<br>613 | 0.0645<br>1613 | 0.086<br>95652 | 0.625<br>7861<br>1 |
| Cell_c<br>ycle | 1 | 30 | 1 | 30 | 11 | 104 | 0.03225<br>806 | 0.0322<br>5806 | 0.095<br>65217 | 0.154<br>0711<br>8 |
| Myc            | 2 | 29 | 1 | 30 | 2  | 113 | 0.06451<br>613 | 0.0322<br>5806 | 0.017<br>3913  | 0.164<br>4756<br>8 |
| Wnt            | 0 | 31 | 1 | 30 | 4  | 111 | 0              | 0.0322<br>5806 | 0.034<br>78261 | 0.340<br>4568<br>3 |
| Hippo          | 0 | 31 | 0 | 31 | 3  | 112 | 0              | 0              | 0.026<br>08696 | 0.235<br>8879<br>1 |

---

Table S15. Co-occurrence and Mutual Exclusivity of Oncogenic Pathway in the Entire Cohort.

| pathway1     | pathway2     | pValue   | oddsRatio | 0/0 | 1/1 | 0/1  | 1/0 | Event              | pair                     | event_ratio |
|--------------|--------------|----------|-----------|-----|-----|------|-----|--------------------|--------------------------|-------------|
| PI3K         | Myc          | 7.63E-05 | 25.79558  | 225 | 53  | 314  |     | Co_Occurence       | Myc, PI3K                | 5/17        |
| Cell_cycle   | PI3K         | 0.000298 | 10.98951  | 219 | 613 | 99   |     | Co_Occurence       | Cell_cycle, PI3K         | 6/22        |
| Myc          | Cell_cycle   | 0.008508 | 11.07481  | 227 | 312 | 55   |     | Co_Occurence       | Cell_cycle, Myc          | 3/17        |
| RNA_splicing | RTK_RAS      | 0.017801 | 3.9134564 | 648 | 28  | 153  | 3   | Co_Occurence       | RNA_splicing, RTK_RAS    | 28/155      |
| Cell_cycle   | p53          | 0.020257 | 3.852358  | 198 | 634 | 98   |     | Co_Occurence       | Cell_cycle, p53          | 6/43        |
| RTK_RAS      | TGFB         | 0.072776 | 0         | 650 | 02  | 180  |     | Mutually_Exclusive | RTK_RAS, TGFB            | 0/182       |
| Myc          | RTK_RAS      | 0.112083 | Inf       | 678 | 82  | 170  |     | Co_Occurence       | Myc, RTK_RAS             | 8/172       |
| PI3K         | Notch        | 0.148218 | 12.30189  | 227 | 11  | 118  |     | Co_Occurence       | Notch, PI3K              | 1/19        |
| Myc          | RNA_splicing | 0.264468 | 2.402286  | 210 | 229 | 66   |     | Co_Occurence       | Myc, RNA_splicing        | 2/35        |
| RTK_RAS      | PI3K         | 0.295941 | 2.076047  | 646 | 13  | 164  |     | Co_Occurence       | PI3K, RTK_RAS            | 16/167      |
| RNA_splicing | p53          | 0.301813 | 1.613885  | 183 | 733 | 2424 |     | Co_Occurence       | p53, RNA_splicing        | 7/57        |
| PI3K         | Wnt          | 0.332109 | 3.088759  | 224 | 14  | 1818 |     | Co_Occurence       | PI3K, Wnt                | 1/22        |
| RNA_splicing | Hippo        | 0.332413 | 3.538596  | 214 | 12  | 3030 |     | Co_Occurence       | Hippo, RNA_splicing      | 1/32        |
| Myc          | p53          | 0.360773 | 0         | 199 | 040 | 88   |     | Mutually_Exclusive | Myc, p53                 | 0/48        |
| RTK_RAS      | Cell_cycle   | 0.367573 | 2.522365  | 653 | 12  | 167  |     | Co_Occurence       | Cell_cycle, RTK_RAS      | 13/169      |
| p53          | Hippo        | 0.41279  | 2.614574  | 205 | 12  | 3939 |     | Co_Occurence       | Hippo, p53               | 1/41        |
| RTK_RAS      | Notch        | 0.469734 | 0.370464  | 661 | 11  | 179  |     | Mutually_Exclusive | Notch, RTK_RAS           | 1/180       |
| Hippo        | RTK_RAS      | 0.564966 | Inf       | 673 | 37  | 170  |     | Co_Occurence       | Hippo, RTK_RAS           | 3/177       |
| Wnt          | p53          | 0.589868 | 1.299773  | 203 | 139 | 44   |     | Co_Occurence       | p53, Wnt                 | 1/43        |
| Cell_cycle   | RNA_splicing | 0.701108 | 0.482072  | 202 | 130 | 1414 |     | Mutually_Exclusive | Cell_cycle, RNA_splicing | 1/44        |



|            |              |   |          |     |    |    |    |                    |                     |        |
|------------|--------------|---|----------|-----|----|----|----|--------------------|---------------------|--------|
| RTK_RAS    | p53          | 1 | 0.977794 | 56  | 29 | 11 | 15 | Mutually_Exclusive | p53, RTK_RAS        | 29/162 |
| Notch      | p53          | 1 | 0        | 205 | 0  | 40 | 2  | Mutually_Exclusive | Notch, p53          | 0/42   |
| TGFB       | p53          | 1 | 0        | 205 | 0  | 40 | 2  | Mutually_Exclusive | p53, TGFB           | 0/42   |
| Hippo      | PI3K         | 1 | 0        | 225 | 0  | 19 | 3  | Mutually_Exclusive | Hippo, PI3K         | 0/22   |
| TGFB       | PI3K         | 1 | 0        | 226 | 0  | 19 | 2  | Mutually_Exclusive | PI3K, TGFB          | 0/21   |
| Wnt        | Myc          | 1 | 0        | 234 | 0  | 8  | 5  | Mutually_Exclusive | Myc, Wnt            | 0/13   |
| Cell_cycle | Wnt          | 1 | 0        | 227 | 0  | 5  | 15 | Mutually_Exclusive | Cell_cycle, Wnt     | 0/20   |
| Hippo      | Wnt          | 1 | 0        | 239 | 0  | 5  | 3  | Mutually_Exclusive | Hippo, Wnt          | 0/8    |
| Notch      | Hippo        | 1 | 0        | 242 | 0  | 3  | 2  | Mutually_Exclusive | Hippo, Notch        | 0/5    |
| TGFB       | Hippo        | 1 | 0        | 242 | 0  | 3  | 2  | Mutually_Exclusive | Hippo, TGFB         | 0/5    |
| Wnt        | RTK_RAS      | 1 | 1.497834 | 66  | 46 | 17 | 1  | Co_Occurence       | RTK_RAS, Wnt        | 4/177  |
| PI3K       | p53          | 1 | 0.968024 | 191 | 3  | 37 | 16 | Mutually_Exclusive | p53, PI3K           | 3/53   |
| PI3K       | RNA_splicing | 1 | 0.807956 | 199 | 2  | 29 | 17 | Mutually_Exclusive | PI3K, RNA_splicing  | 2/46   |
| Wnt        | RNA_splicing | 1 | 0        | 211 | 0  | 31 | 5  | Mutually_Exclusive | RNA_splicing, Wnt   | 0/36   |
| Notch      | RNA_splicing | 1 | 0        | 214 | 0  | 31 | 2  | Mutually_Exclusive | Notch, RNA_splicing | 0/33   |
| TGFB       | RNA_splicing | 1 | 0        | 214 | 0  | 31 | 2  | Mutually_Exclusive | RNA_splicing, TGFB  | 0/33   |
| Hippo      | Cell_cycle   | 1 | 0        | 229 | 0  | 15 | 3  | Mutually_Exclusive | Cell_cycle, Hippo   | 0/18   |
| Notch      | Cell_cycle   | 1 | 0        | 230 | 0  | 15 | 2  | Mutually_Exclusive | Cell_cycle, Notch   | 0/17   |
| TGFB       | Cell_cycle   | 1 | 0        | 230 | 0  | 15 | 2  | Mutually_Exclusive | Cell_cycle, TGFB    | 0/17   |
| Hippo      | Myc          | 1 | 0        | 236 | 0  | 8  | 3  | Mutually_Exclusive | Hippo, Myc          | 0/11   |
| Notch      | Myc          | 1 | 0        | 237 | 0  | 8  | 2  | Mutually_Exclusive | Myc, Notch          | 0/10   |
| TGFB       | Myc          | 1 | 0        | 237 | 0  | 8  | 2  | Mutually_Exclusive | Myc, TGFB           | 0/10   |

|       |       |   |   |         |   |   |   |                        |             |     |
|-------|-------|---|---|---------|---|---|---|------------------------|-------------|-----|
| Notch | Wnt   | 1 | 0 | 24<br>0 | 0 | 5 | 2 | Mutually_Excl<br>usive | Notch, Wnt  | 0/7 |
| TGFB  | Wnt   | 1 | 0 | 24<br>0 | 0 | 5 | 2 | Mutually_Excl<br>usive | TGFB, Wnt   | 0/7 |
| TGFB  | Notch | 1 | 0 | 24<br>3 | 0 | 2 | 2 | Mutually_Excl<br>usive | Notch, TGFB | 0/4 |

---

Table S16. Co-occurrence and Mutual Exclusivity of Oncogenic Pathway in pGGN Cohort.

| pathway1     | pathway2     | pValue       | oddsRatio    | 0/0    | 1/1 | 0/1    | 1/0 | Event              | pair                  | event_ratio |
|--------------|--------------|--------------|--------------|--------|-----|--------|-----|--------------------|-----------------------|-------------|
| Cell_cycle   | PI3K         | 0.0034<br>18 | Inf          | 7<br>2 | 2   | 3      | 0   | Co_Occurence       | Cell_cycle, PI3K      | 2/3         |
| Myc          | Cell_cycle   | 0.0768<br>97 | 30.0014<br>7 | 7<br>3 | 1   | 1      | 2   | Co_Occurence       | Cell_cycle, Myc       | 1/3         |
| Notch        | PI3K         | 0.1264<br>52 | 15.9926<br>5 | 7<br>1 | 1   | 4      | 1   | Co_Occurence       | Notch, PI3K           | 1/5         |
| RNA_splicing | p53          | 0.1426<br>58 | 4.43267<br>6 | 6<br>4 | 2   | 4      | 7   | Co_Occurence       | p53, RNA_splicing     | 2/11        |
| RNA_splicing | RTK_RAS      | 0.1488<br>1  | 4.87412<br>9 | 2<br>6 | 8   | 4<br>2 | 1   | Co_Occurence       | RNA_splicing, RTK_RAS | 8/43        |
| PI3K         | Myc          | 0.1846<br>89 | 8.21345<br>5 | 7<br>0 | 1   | 2      | 4   | Co_Occurence       | Myc, PI3K             | 1/6         |
| Myc          | RNA_splicing | 0.3148<br>87 | 4.00748<br>9 | 6<br>6 | 1   | 8      | 2   | Co_Occurence       | Myc, RNA_splicing     | 1/10        |
| Cell_cycle   | RTK_RAS      | 0.5386<br>19 | Inf          | 2<br>7 | 2   | 4<br>8 | 0   | Co_Occurence       | Cell_cycle, RTK_RAS   | 2/48        |
| Myc          | RTK_RAS      | 0.5478<br>47 | Inf          | 2<br>7 | 3   | 4<br>7 | 0   | Co_Occurence       | Myc, RTK_RAS          | 3/47        |
| PI3K         | RNA_splicing | 1            | 0            | 6<br>3 | 0   | 9      | 5   | Mutually_Exclusive | PI3K, RNA_splicing    | 0/14        |
| Myc          | Notch        | 1            | 0            | 7<br>2 | 0   | 2      | 3   | Mutually_Exclusive | Myc, Notch            | 0/5         |
| p53          | RTK_RAS      | 1            | 1.08580<br>4 | 2<br>5 | 4   | 4<br>6 | 2   | Co_Occurence       | p53, RTK_RAS          | 4/48        |
| PI3K         | RTK_RAS      | 1            | 0.80029<br>6 | 2<br>5 | 3   | 4<br>7 | 2   | Mutually_Exclusive | PI3K, RTK_RAS         | 3/49        |
| Wnt          | RTK_RAS      | 1            | 0            | 2<br>7 | 0   | 5<br>0 | 0   | Mutually_Exclusive | RTK_RAS, Wnt          | 0/50        |
| Hippo        | RTK_RAS      | 1            | 0            | 2<br>7 | 0   | 5<br>0 | 0   | Mutually_Exclusive | Hippo, RTK_RAS        | 0/50        |
| Notch        | RTK_RAS      | 1            | 0.53526<br>6 | 2<br>6 | 1   | 4<br>9 | 1   | Mutually_Exclusive | Notch, RTK_RAS        | 1/50        |
| TGFB         | RTK_RAS      | 1            | 0            | 2<br>7 | 0   | 5<br>0 | 0   | Mutually_Exclusive | RTK_RAS, TGFB         | 0/50        |
| PI3K         | p53          | 1            | 0            | 6<br>6 | 0   | 6      | 5   | Mutually_Exclusive | p53, PI3K             | 0/11        |
| Cell_cycle   | p53          | 1            | 0            | 6<br>9 | 0   | 6      | 2   | Mutually_Exclusive | Cell_cycle, p53       | 0/8         |
| Myc          | p53          | 1            | 0            | 6<br>8 | 0   | 6      | 3   | Mutually_Exclusive | Myc, p53              | 0/9         |

|            |              |   |   |        |   |   |   |                    |                          |      |
|------------|--------------|---|---|--------|---|---|---|--------------------|--------------------------|------|
| Wnt        | p53          | 1 | 0 | 7<br>1 | 0 | 6 | 0 | Mutually_Exclusive | p53, Wnt                 | 0/6  |
| Hippo      | p53          | 1 | 0 | 7<br>1 | 0 | 6 | 0 | Mutually_Exclusive | Hippo, p53               | 0/6  |
| Notch      | p53          | 1 | 0 | 6<br>9 | 0 | 6 | 2 | Mutually_Exclusive | Notch, p53               | 0/8  |
| TGFB       | p53          | 1 | 0 | 7<br>1 | 0 | 6 | 0 | Mutually_Exclusive | p53, TGFB                | 0/6  |
| Cell_cycle | RNA_splicing | 1 | 0 | 6<br>6 | 0 | 9 | 2 | Mutually_Exclusive | Cell_cycle, RNA_splicing | 0/11 |
| Wnt        | RNA_splicing | 1 | 0 | 6<br>8 | 0 | 9 | 0 | Mutually_Exclusive | RNA_splicing, Wnt        | 0/9  |
| Hippo      | RNA_splicing | 1 | 0 | 6<br>8 | 0 | 9 | 0 | Mutually_Exclusive | Hippo, RNA_splicing      | 0/9  |
| Notch      | RNA_splicing | 1 | 0 | 6<br>6 | 0 | 9 | 2 | Mutually_Exclusive | Notch, RNA_splicing      | 0/11 |
| TGFB       | RNA_splicing | 1 | 0 | 6<br>8 | 0 | 9 | 0 | Mutually_Exclusive | RNA_splicing, TGFB       | 0/9  |
| Wnt        | PI3K         | 1 | 0 | 7<br>2 | 0 | 5 | 0 | Mutually_Exclusive | PI3K, Wnt                | 0/5  |
| Hippo      | PI3K         | 1 | 0 | 7<br>2 | 0 | 5 | 0 | Mutually_Exclusive | Hippo, PI3K              | 0/5  |
| TGFB       | PI3K         | 1 | 0 | 7<br>2 | 0 | 5 | 0 | Mutually_Exclusive | PI3K, TGFB               | 0/5  |
| Wnt        | Cell_cycle   | 1 | 0 | 7<br>5 | 0 | 2 | 0 | Mutually_Exclusive | Cell_cycle, Wnt          | 0/2  |
| Hippo      | Cell_cycle   | 1 | 0 | 7<br>5 | 0 | 2 | 0 | Mutually_Exclusive | Cell_cycle, Hippo        | 0/2  |
| Notch      | Cell_cycle   | 1 | 0 | 7<br>3 | 0 | 2 | 2 | Mutually_Exclusive | Cell_cycle, Notch        | 0/4  |
| TGFB       | Cell_cycle   | 1 | 0 | 7<br>5 | 0 | 2 | 0 | Mutually_Exclusive | Cell_cycle, TGFB         | 0/2  |
| Wnt        | Myc          | 1 | 0 | 7<br>4 | 0 | 3 | 0 | Mutually_Exclusive | Myc, Wnt                 | 0/3  |
| Hippo      | Myc          | 1 | 0 | 7<br>4 | 0 | 3 | 0 | Mutually_Exclusive | Hippo, Myc               | 0/3  |
| TGFB       | Myc          | 1 | 0 | 7<br>4 | 0 | 3 | 0 | Mutually_Exclusive | Myc, TGFB                | 0/3  |
| Hippo      | Wnt          | 1 | 0 | 7<br>7 | 0 | 0 | 0 | Mutually_Exclusive | Hippo, Wnt               | 0/0  |
| Notch      | Wnt          | 1 | 0 | 7<br>5 | 0 | 0 | 2 | Mutually_Exclusive | Notch, Wnt               | 0/2  |
| TGFB       | Wnt          | 1 | 0 | 7<br>7 | 0 | 0 | 0 | Mutually_Exclusive | TGFB, Wnt                | 0/0  |

|       |       |   |   |        |   |   |   |                        |              |     |
|-------|-------|---|---|--------|---|---|---|------------------------|--------------|-----|
| Notch | Hippo | 1 | 0 | 7<br>5 | 0 | 0 | 2 | Mutually_Excl<br>usive | Hippo, Notch | 0/2 |
| TGFB  | Hippo | 1 | 0 | 7<br>7 | 0 | 0 | 0 | Mutually_Excl<br>usive | Hippo, TGFB  | 0/0 |
| TGFB  | Notch | 1 | 0 | 7<br>5 | 0 | 2 | 0 | Mutually_Excl<br>usive | Notch, TGFB  | 0/2 |

---

Table S17. Co-occurrence and Mutual Exclusivity of Oncogenic Pathway in HGGN Cohort.

| pathway1     | pathway2     | pValue   | oddsRatio | 0/0 | 1/1 | 0/1 | 1/0 | Event              | pair                     | event_ratio |
|--------------|--------------|----------|-----------|-----|-----|-----|-----|--------------------|--------------------------|-------------|
| PI3K         | Myc          | 0.00266  | Inf       | 45  | 2   | 0   | 1   | Co_Occurence       | Myc, PI3K                | 2/1         |
| p53          | RTK_RAS      | 0.550763 | 0.579013  | 10  | 2   | 35  | 1   | Mutually_Exclusive | p53, RTK_RAS             | 2/36        |
| RNA_splicing | RTK_RAS      | 0.560746 | Inf       | 11  | 4   | 33  | 0   | Co_Occurence       | RNA_splicing, RTK_RAS    | 4/33        |
| p53          | Myc          | 1        | 0         | 43  | 0   | 2   | 3   | Mutually_Exclusive | Myc, p53                 | 0/5         |
| PI3K         | RTK_RAS      | 1        | Inf       | 11  | 3   | 34  | 0   | Co_Occurence       | PI3K, RTK_RAS            | 3/34        |
| Cell_cycle   | RTK_RAS      | 1        | Inf       | 11  | 1   | 36  | 0   | Co_Occurence       | Cell_cycle, RTK_RAS      | 1/36        |
| Myc          | RTK_RAS      | 1        | Inf       | 11  | 2   | 35  | 0   | Co_Occurence       | Myc, RTK_RAS             | 2/35        |
| Wnt          | RTK_RAS      | 1        | Inf       | 11  | 1   | 36  | 0   | Co_Occurence       | RTK_RAS, Wnt             | 1/36        |
| Hippo        | RTK_RAS      | 1        | 0         | 11  | 0   | 37  | 0   | Mutually_Exclusive | Hippo, RTK_RAS           | 0/37        |
| Notch        | RTK_RAS      | 1        | 0         | 11  | 0   | 37  | 0   | Mutually_Exclusive | Notch, RTK_RAS           | 0/37        |
| TGFB         | RTK_RAS      | 1        | 0         | 11  | 0   | 37  | 0   | Mutually_Exclusive | RTK_RAS, TGFB            | 0/37        |
| RNA_splicing | p53          | 1        | 0         | 41  | 0   | 34  | 4   | Mutually_Exclusive | p53, RNA_splicing        | 0/7         |
| PI3K         | p53          | 1        | 0         | 42  | 0   | 33  | 3   | Mutually_Exclusive | p53, PI3K                | 0/6         |
| Cell_cycle   | p53          | 1        | 0         | 44  | 0   | 31  | 1   | Mutually_Exclusive | Cell_cycle, p53          | 0/4         |
| Wnt          | p53          | 1        | 0         | 44  | 0   | 31  | 1   | Mutually_Exclusive | p53, Wnt                 | 0/4         |
| Hippo        | p53          | 1        | 0         | 45  | 0   | 30  | 0   | Mutually_Exclusive | Hippo, p53               | 0/3         |
| Notch        | p53          | 1        | 0         | 45  | 0   | 30  | 0   | Mutually_Exclusive | Notch, p53               | 0/3         |
| TGFB         | p53          | 1        | 0         | 45  | 0   | 30  | 0   | Mutually_Exclusive | p53, TGFB                | 0/3         |
| PI3K         | RNA_splicing | 1        | 0         | 41  | 0   | 43  | 3   | Mutually_Exclusive | PI3K, RNA_splicing       | 0/7         |
| Cell_cycle   | RNA_splicing | 1        | 0         | 43  | 0   | 41  | 1   | Mutually_Exclusive | Cell_cycle, RNA_splicing | 0/5         |

|            |                 |   |   |        |   |   |   |                        |                        |     |
|------------|-----------------|---|---|--------|---|---|---|------------------------|------------------------|-----|
| Myc        | RNA_spl<br>cing | 1 | 0 | 4<br>2 | 0 | 4 | 2 | Mutually_Excl<br>usive | Myc, RNA_splicing      | 0/6 |
| Wnt        | RNA_spl<br>cing | 1 | 0 | 4<br>3 | 0 | 4 | 1 | Mutually_Excl<br>usive | RNA_splicing, Wnt      | 0/5 |
| Hippo      | RNA_spl<br>cing | 1 | 0 | 4<br>4 | 0 | 4 | 0 | Mutually_Excl<br>usive | Hippo,<br>RNA_splicing | 0/4 |
| Notch      | RNA_spl<br>cing | 1 | 0 | 4<br>4 | 0 | 4 | 0 | Mutually_Excl<br>usive | Notch,<br>RNA_splicing | 0/4 |
| TGFB       | RNA_spl<br>cing | 1 | 0 | 4<br>4 | 0 | 4 | 0 | Mutually_Excl<br>usive | RNA_splicing,<br>TGFB  | 0/4 |
| Cell_cycle | PI3K            | 1 | 0 | 4<br>4 | 0 | 3 | 1 | Mutually_Excl<br>usive | Cell_cycle, PI3K       | 0/4 |
| Wnt        | PI3K            | 1 | 0 | 4<br>4 | 0 | 3 | 1 | Mutually_Excl<br>usive | PI3K, Wnt              | 0/4 |
| Hippo      | PI3K            | 1 | 0 | 4<br>5 | 0 | 3 | 0 | Mutually_Excl<br>usive | Hippo, PI3K            | 0/3 |
| Notch      | PI3K            | 1 | 0 | 4<br>5 | 0 | 3 | 0 | Mutually_Excl<br>usive | Notch, PI3K            | 0/3 |
| TGFB       | PI3K            | 1 | 0 | 4<br>5 | 0 | 3 | 0 | Mutually_Excl<br>usive | PI3K, TGFB             | 0/3 |
| Myc        | Cell_cycle      | 1 | 0 | 4<br>5 | 0 | 1 | 2 | Mutually_Excl<br>usive | Cell_cycle, Myc        | 0/3 |
| Wnt        | Cell_cycle      | 1 | 0 | 4<br>6 | 0 | 1 | 1 | Mutually_Excl<br>usive | Cell_cycle, Wnt        | 0/2 |
| Hippo      | Cell_cycle      | 1 | 0 | 4<br>7 | 0 | 1 | 0 | Mutually_Excl<br>usive | Cell_cycle, Hippo      | 0/1 |
| Notch      | Cell_cycle      | 1 | 0 | 4<br>7 | 0 | 1 | 0 | Mutually_Excl<br>usive | Cell_cycle, Notch      | 0/1 |
| TGFB       | Cell_cycle      | 1 | 0 | 4<br>7 | 0 | 1 | 0 | Mutually_Excl<br>usive | Cell_cycle, TGFB       | 0/1 |
| Wnt        | Myc             | 1 | 0 | 4<br>5 | 0 | 2 | 1 | Mutually_Excl<br>usive | Myc, Wnt               | 0/3 |
| Hippo      | Myc             | 1 | 0 | 4<br>6 | 0 | 2 | 0 | Mutually_Excl<br>usive | Hippo, Myc             | 0/2 |
| Notch      | Myc             | 1 | 0 | 4<br>6 | 0 | 2 | 0 | Mutually_Excl<br>usive | Myc, Notch             | 0/2 |
| TGFB       | Myc             | 1 | 0 | 4<br>6 | 0 | 2 | 0 | Mutually_Excl<br>usive | Myc, TGFB              | 0/2 |
| Hippo      | Wnt             | 1 | 0 | 4<br>7 | 0 | 1 | 0 | Mutually_Excl<br>usive | Hippo, Wnt             | 0/1 |
| Notch      | Wnt             | 1 | 0 | 4<br>7 | 0 | 1 | 0 | Mutually_Excl<br>usive | Notch, Wnt             | 0/1 |
| TGFB       | Wnt             | 1 | 0 | 4<br>7 | 0 | 1 | 0 | Mutually_Excl<br>usive | TGFB, Wnt              | 0/1 |

|       |       |   |   |        |   |   |   |                        |              |     |
|-------|-------|---|---|--------|---|---|---|------------------------|--------------|-----|
| Notch | Hippo | 1 | 0 | 4<br>8 | 0 | 0 | 0 | Mutually_Excl<br>usive | Hippo, Notch | 0/0 |
| TGFB  | Hippo | 1 | 0 | 4<br>8 | 0 | 0 | 0 | Mutually_Excl<br>usive | Hippo, TGFB  | 0/0 |
| TGFB  | Notch | 1 | 0 | 4<br>8 | 0 | 0 | 0 | Mutually_Excl<br>usive | Notch, TGFB  | 0/0 |

---



Table S18. Co-occurrence and Mutual Exclusivity of Oncogenic Pathway in PSN Cohort.

| pathway1     | pathway2     | pValue   | oddsRatio | 0/0 | 1/1 | 0/1 | 1/0 | Event              | pair                  | event_ratio |
|--------------|--------------|----------|-----------|-----|-----|-----|-----|--------------------|-----------------------|-------------|
| Cell_cycle   | PI3K         | 0.012518 | 7.144426  | 103 | 4   | 7   | 8   | Co_Occurence       | Cell_cycle, PI3K      | 4/15        |
| PI3K         | Myc          | 0.021237 | 22.89258  | 110 | 2   | 1   | 9   | Co_Occurence       | Myc, PI3K             | 2/10        |
| Myc          | Cell_cycle   | 0.025335 | 20.55864  | 109 | 2   | 1   | 0   | Co_Occurence       | Cell_cycle, Myc       | 2/11        |
| RTK_RAS      | TGFB         | 0.055006 | 0         | 27  | 0   | 2   | 3   | Mutually_Exclusive | RTK_RAS, TGFB         | 0/95        |
| Cell_cycle   | p53          | 0.073364 | 3.358547  | 85  | 6   | 2   | 5   | Co_Occurence       | Cell_cycle, p53       | 6/31        |
| RTK_RAS      | RNA_splicing | 0.236231 | 2.786155  | 27  | 16  | 2   | 7   | Co_Occurence       | RNA_splicing, RTK_RAS | 16/79       |
| Wnt          | PI3K         | 0.318144 | 3.540184  | 108 | 1   | 1   | 0   | Co_Occurence       | PI3K, Wnt             | 1/13        |
| RNA_splicing | Myc          | 0.3832   | 2.962658  | 102 | 1   | 2   | 1   | Co_Occurence       | Myc, RNA_splicing     | 1/19        |
| RNA_splicing | Hippo        | 0.3832   | 2.962658  | 102 | 1   | 2   | 1   | Co_Occurence       | Hippo, RNA_splicing   | 1/19        |
| PI3K         | RTK_RAS      | 0.456533 | 3.348449  | 28  | 10  | 8   | 3   | Co_Occurence       | PI3K, RTK_RAS         | 10/84       |
| Myc          | p53          | 0.570028 | 0         | 88  | 0   | 3   | 1   | Mutually_Exclusive | Myc, p53              | 0/34        |
| RNA_splicing | PI3K         | 0.665199 | 1.316203  | 95  | 2   | 9   | 1   | Co_Occurence       | PI3K, RNA_splicing    | 2/25        |
| RTK_RAS      | Cell_cycle   | 0.72924  | 1.62072   | 27  | 10  | 2   | 3   | Co_Occurence       | Cell_cycle, RTK_RAS   | 10/85       |
| p53          | RNA_splicing | 0.775571 | 1.152441  | 78  | 5   | 1   | 2   | Co_Occurence       | p53, RNA_splicing     | 5/39        |
| p53          | RTK_RAS      | 0.808558 | 0.863578  | 21  | 2   | 7   | 3   | Mutually_Exclusive | p53, RTK_RAS          | 23/78       |
| TGFB         | p53          | 1        | 0         | 89  | 0   | 3   | 1   | Mutually_Exclusive | p53, TGFB             | 0/33        |
| Hippo        | PI3K         | 1        | 0         | 108 | 0   | 1   | 1   | Mutually_Exclusive | Hippo, PI3K           | 0/14        |
| Wnt          | TGFB         | 1        | 0         | 116 | 0   | 2   | 4   | Mutually_Exclusive | TGFB, Wnt             | 0/6         |
| Myc          | RTK_RAS      | 1        | Inf       | 29  | 3   | 9   | 0   | Co_Occurence       | Myc, RTK_RAS          | 3/90        |
| Wnt          | RTK_RAS      | 1        | 0.933864  | 28  | 3   | 9   | 1   | Mutually_Exclusive | RTK_RAS, Wnt          | 3/91        |

|            |              |   |          |    |    |   |   |                    |                          |      |
|------------|--------------|---|----------|----|----|---|---|--------------------|--------------------------|------|
| Hippo      | RTK_RAS      | 1 | Inf      | 29 | 3  | 9 | 0 | Co_Occurence       | Hippo, RTK_RAS           | 3/90 |
| Notch      | RTK_RAS      | 1 |          | 0  | 29 | 0 | 9 | Mutually_Exclusive | Notch, RTK_RAS           | 0/93 |
| PI3K       | p53          | 1 | 1.110614 | 83 | 3  | 2 | 8 | Co_Occurence       | p53, PI3K                | 3/36 |
| Wnt        | p53          | 1 | 0.977948 | 88 | 1  | 3 | 0 | Mutually_Exclusive | p53, Wnt                 | 1/33 |
| Hippo      | p53          | 1 | 1.478124 | 89 | 1  | 3 | 0 | Co_Occurence       | Hippo, p53               | 1/32 |
| Notch      | p53          | 1 |          | 0  | 91 | 0 | 3 | Mutually_Exclusive | Notch, p53               | 0/31 |
| Cell_cycle | RNA_splicing | 1 | 0.499658 | 93 | 1  | 1 | 1 | Mutually_Exclusive | Cell_cycle, RNA_splicing | 1/28 |
| Wnt        | RNA_splicing | 1 |          | 0  | 10 | 0 | 1 | Mutually_Exclusive | RNA_splicing, Wnt        | 0/22 |
| Notch      | RNA_splicing | 1 |          | 0  | 10 | 0 | 1 | Mutually_Exclusive | Notch, RNA_splicing      | 0/18 |
| TGFB       | RNA_splicing | 1 |          | 0  | 10 | 0 | 1 | Mutually_Exclusive | RNA_splicing, TGFB       | 0/20 |
| Notch      | PI3K         | 1 |          | 0  | 11 | 0 | 1 | Mutually_Exclusive | Notch, PI3K              | 0/11 |
| TGFB       | PI3K         | 1 |          | 0  | 10 | 0 | 1 | Mutually_Exclusive | PI3K, TGFB               | 0/13 |
| Wnt        | Cell_cycle   | 1 |          | 0  | 10 | 0 | 1 | Mutually_Exclusive | Cell_cycle, Wnt          | 0/16 |
| Hippo      | Cell_cycle   | 1 |          | 0  | 10 | 0 | 1 | Mutually_Exclusive | Cell_cycle, Hippo        | 0/15 |
| Notch      | Cell_cycle   | 1 |          | 0  | 11 | 0 | 1 | Mutually_Exclusive | Cell_cycle, Notch        | 0/12 |
| TGFB       | Cell_cycle   | 1 |          | 0  | 10 | 0 | 1 | Mutually_Exclusive | Cell_cycle, TGFB         | 0/14 |
| Wnt        | Myc          | 1 |          | 0  | 11 | 0 | 3 | Mutually_Exclusive | Myc, Wnt                 | 0/7  |
| Hippo      | Myc          | 1 |          | 0  | 11 | 0 | 3 | Mutually_Exclusive | Hippo, Myc               | 0/6  |
| Notch      | Myc          | 1 |          | 0  | 11 | 0 | 3 | Mutually_Exclusive | Myc, Notch               | 0/3  |
| TGFB       | Myc          | 1 |          | 0  | 11 | 0 | 3 | Mutually_Exclusive | Myc, TGFB                | 0/5  |
| Hippo      | Wnt          | 1 |          | 0  | 11 | 0 | 4 | Mutually_Exclusive | Hippo, Wnt               | 0/7  |
| Notch      | Wnt          | 1 |          | 0  | 11 | 0 | 4 | Mutually_Exclusive | Notch, Wnt               | 0/4  |

|       |       |   |   |         |   |   |   |                        |              |     |
|-------|-------|---|---|---------|---|---|---|------------------------|--------------|-----|
| Notch | Hippo | 1 | 0 | 11<br>9 | 0 | 3 | 0 | Mutually_Excl<br>usive | Hippo, Notch | 0/3 |
| TGFB  | Hippo | 1 | 0 | 11<br>7 | 0 | 3 | 2 | Mutually_Excl<br>usive | Hippo, TGFB  | 0/5 |
| TGFB  | Notch | 1 | 0 | 12<br>0 | 0 | 0 | 2 | Mutually_Excl<br>usive | Notch, TGFB  | 0/2 |

---

Table S19. Mutational Signature (WES Cohort).

| Mutation Type | Denovo S1  | Denovo S2  | Denovo S3  |
|---------------|------------|------------|------------|
| A[C>A]A       | 0.00844882 | 0.01946685 | 0.00929192 |
| A[C>A]C       | 0.01058873 | 0.02122696 | 0.00821073 |
| A[C>A]G       | 0.00184669 | 0.0215169  | 1.0589E-11 |
| A[C>A]T       | 2.716E-19  | 0.01842074 | 0.00414456 |
| C[C>A]A       | 3.449E-11  | 0.05122111 | 0.02365877 |
| C[C>A]C       | 0.01045541 | 0.06708672 | 3.37E-19   |
| C[C>A]G       | 2.716E-19  | 0.04869143 | 1.1935E-10 |
| C[C>A]T       | 1.5885E-10 | 0.05732029 | 3.37E-19   |
| G[C>A]A       | 0.0190271  | 0.02630604 | 0.00080165 |
| G[C>A]C       | 0.00407225 | 0.0457637  | 0.00592003 |
| G[C>A]G       | 0.00537509 | 0.01982475 | 0.00741142 |
| G[C>A]T       | 0.017336   | 0.01516709 | 3.3332E-14 |
| T[C>A]A       | 0.01891275 | 0.02226011 | 3.37E-19   |
| T[C>A]C       | 0.01631495 | 0.04174828 | 0.00958281 |
| T[C>A]G       | 0.00627723 | 0.01445268 | 0.00518635 |
| T[C>A]T       | 0.02507557 | 0.02177685 | 0.00890603 |
| A[C>G]A       | 2.716E-19  | 0.00545611 | 0.01501579 |
| A[C>G]C       | 0.01163693 | 0.00014119 | 3.37E-19   |
| A[C>G]G       | 2.716E-19  | 0.00173828 | 0.00961364 |
| A[C>G]T       | 0.00856425 | 0.00140933 | 0.00186256 |
| C[C>G]A       | 0.00523586 | 0.00906073 | 0.00657922 |
| C[C>G]C       | 0.01169264 | 0.00277129 | 0.0038031  |
| C[C>G]G       | 0.00850836 | 0.00687692 | 1.3772E-18 |
| C[C>G]T       | 0.01323547 | 0.00616104 | 0.01131757 |
| G[C>G]A       | 2.716E-19  | 0.00724006 | 0.00152769 |
| G[C>G]C       | 4.1579E-13 | 0.00909036 | 0.00966213 |
| G[C>G]G       | 0.00408743 | 0.00755287 | 0.00114838 |
| G[C>G]T       | 0.00719203 | 0.00888754 | 0.00790054 |
| T[C>G]A       | 0.01776683 | 0.00486097 | 0.00797798 |
| T[C>G]C       | 0.00972665 | 0.00898891 | 0.01686515 |
| T[C>G]G       | 0.00159686 | 0.00420948 | 0.00585366 |
| T[C>G]T       | 0.01459438 | 0.00859953 | 0.02693444 |
| A[C>T]A       | 0.0141157  | 0.00431551 | 0.01134806 |
| A[C>T]C       | 0.01771037 | 0.00547925 | 0.01212854 |
| A[C>T]G       | 0.07405467 | 3.8591E-16 | 2.3578E-10 |
| A[C>T]T       | 0.00801849 | 0.00372638 | 0.00962502 |
| C[C>T]A       | 0.00656859 | 0.01398342 | 0.05069011 |
| C[C>T]C       | 0.01686089 | 0.01491764 | 0.03759897 |
| C[C>T]G       | 0.06407284 | 0.01414436 | 0.02044592 |
| C[C>T]T       | 0.03025947 | 0.01903944 | 0.0143036  |
| G[C>T]A       | 0.03960585 | 0.0088074  | 2.4409E-13 |
| G[C>T]C       | 0.02899051 | 0.01515088 | 0.02726619 |

|         |            |            |            |
|---------|------------|------------|------------|
| G[C>T]G | 0.05511271 | 0.01476673 | 0.04541827 |
| G[C>T]T | 0.02137418 | 0.00318731 | 0.03084419 |
| T[C>T]A | 0.0470116  | 0.00421427 | 0.02918832 |
| T[C>T]C | 0.02293701 | 0.01091017 | 0.042376   |
| T[C>T]G | 0.0566332  | 4.6588E-11 | 0.01869968 |
| T[C>T]T | 0.02618992 | 0.00676552 | 0.02849134 |
| A[T>A]A | 0.00299552 | 0.00392378 | 3.6104E-13 |
| A[T>A]C | 0.01341123 | 0.00388284 | 3.37E-19   |
| A[T>A]G | 0.0056275  | 0.01337879 | 0.00802115 |
| A[T>A]T | 0.00693047 | 0.00153862 | 0.00417338 |
| C[T>A]A | 0.007606   | 0.01735382 | 3.37E-19   |
| C[T>A]C | 2.716E-19  | 0.01270837 | 0.00975021 |
| C[T>A]G | 2.716E-19  | 0.0412509  | 0.01496448 |
| C[T>A]T | 0.00386995 | 0.01262914 | 0.00606077 |
| G[T>A]A | 0.00342073 | 0.00767632 | 0.00472554 |
| G[T>A]C | 0.00209547 | 0.01254846 | 3.37E-19   |
| G[T>A]G | 0.00396911 | 0.02108529 | 3.37E-19   |
| G[T>A]T | 0.00587019 | 5.8359E-10 | 4.5774E-12 |
| T[T>A]A | 0.00235987 | 0.00628285 | 0.00107134 |
| T[T>A]C | 0.0036265  | 0.00356112 | 0.00419744 |
| T[T>A]G | 5.0702E-17 | 0.01205714 | 0.00368671 |
| T[T>A]T | 2.716E-19  | 0.00223629 | 0.00635388 |
| A[T>C]A | 2.716E-19  | 0.00815518 | 0.03713226 |
| A[T>C]C | 0.00231934 | 0.00245345 | 0.01890427 |
| A[T>C]G | 8.7292E-07 | 0.00390926 | 0.04044552 |
| A[T>C]T | 0.00973085 | 0.00209677 | 0.03122011 |
| C[T>C]A | 2.716E-19  | 0.00573766 | 0.0099602  |
| C[T>C]C | 0.00456378 | 0.00379401 | 0.01134779 |
| C[T>C]G | 0.01721226 | 0.0137966  | 0.01457506 |
| C[T>C]T | 0.00904369 | 6.2698E-18 | 0.01828664 |
| G[T>C]A | 0.00870107 | 0.00048884 | 0.00809356 |
| G[T>C]C | 0.01806212 | 3.3476E-12 | 3.0852E-11 |
| G[T>C]G | 0.00838167 | 0.00928707 | 0.00838681 |
| G[T>C]T | 0.0099438  | 0.00647772 | 0.00845367 |
| T[T>C]A | 0.00495884 | 0.00238956 | 0.00416371 |
| T[T>C]C | 0.00543239 | 9.5927E-18 | 0.0209969  |
| T[T>C]G | 2.716E-19  | 0.00437761 | 0.00874432 |
| T[T>C]T | 0.00939367 | 2.936E-19  | 0.00487944 |
| A[T>G]A | 0.0076764  | 3.7598E-12 | 4.862E-11  |
| A[T>G]C | 9.6817E-12 | 2.936E-19  | 0.00745784 |
| A[T>G]G | 0.00149979 | 0.00138124 | 0.00707653 |
| A[T>G]T | 0.00451553 | 1.2218E-12 | 2.4834E-10 |
| C[T>G]A | 2.716E-19  | 0.00126421 | 0.0013213  |
| C[T>G]C | 0.0071664  | 0.00272902 | 0.00183172 |

|         |            |            |            |
|---------|------------|------------|------------|
| C[T>G]G | 0.0032099  | 0.0025394  | 0.03849015 |
| C[T>G]T | 0.00238831 | 0.00517183 | 0.00835264 |
| G[T>G]A | 9.4346E-12 | 2.936E-19  | 0.0047459  |
| G[T>G]C | 0.00136618 | 0.00121697 | 1.2777E-10 |
| G[T>G]G | 0.00472902 | 0.00094129 | 3.37E-19   |
| G[T>G]T | 2.4499E-11 | 2.936E-19  | 0.00813583 |
| T[T>G]A | 4.5747E-10 | 0.00108086 | 0.00694687 |
| T[T>G]C | 2.268E-11  | 2.936E-19  | 0.01084777 |
| T[T>G]G | 1.6891E-13 | 0.00389431 | 0.00859796 |
| T[T>G]T | 0.01083727 | 3.7835E-12 | 2.5454E-11 |

---
